# Supplementary material for: Multicomponent mapping of boron chemotypes furnishes selective enzyme inhibitors
Source: PubMed Central journal article supplement (PMC5701053; doi:10.1038/s41467-017-01319-4), 2017-11-24
Supplement: 41467_2017_1319_MOESM2_ESM.pdf [file 41467_2017_1319_MOESM2_ESM.pdf]

## Supplementary Methods

**General Information:** Methylene chloride (DCM), methanol (MeOH) and triethylamine were distilled from CaH<sub>2</sub> under nitrogen. Acetonitrile (MeCN) was distilled from activated 4Å MS under nitrogen. Toluene was purified via solvent purification system. Tetrahydrofuran (THF) was freshly distilled from sodium benzophenone ketyl. All other solvents were of reagent grade quality and dried over 4Å MS prior to use. All reagents were purchased from commercial sources and used as received.

**Chromatography:** Flash column chromatography was carried out using Silicycle 230-400 mesh silica gel, or ISCO Teledyne Combiflash R<sub>f</sub> 200 Flash system. Thin-layer chromatography (TLC) was performed on Macherey Nagel pre-coated glass backed TLC plates (SIL G/UV254, 0.25 mm) and visualized using a UV lamp (254 nm), KMnO<sub>4</sub> or curcumin stain (preparation: 200 mg curcumin in 100 mL ethanol). Reverse-phase chromatography was carried out using RediSep R<sub>f</sub> Gold C18 Columns.

**Nuclear Magnetic Resonance Spectroscopy:** <sup>1</sup>H NMR, <sup>13</sup>C, and 2D NMR spectra were recorded on Varian Mercury 300 MHz, 400 MHz, 500 MHz, 600 MHz or 700 MHz spectrometers. <sup>11</sup>B NMR were recorded using Bruker 400/500 MHz spectrometer at 128/160 MHz and referenced to an external standard of BF<sub>3</sub>·Et<sub>2</sub>O (δ = 0 ppm). <sup>1</sup>H NMR spectra chemical shifts (δ) are reported in parts per million (ppm) referenced to residual protonated solvent peak (CD<sub>3</sub>CN δ = 1.94, DMSO-*d*<sub>6</sub>, δ = 2.49, CD<sub>3</sub>OD δ = 3.31 center line). Spectral data is reported as follows: chemical shift, multiplicity (s = singlet, d = doublet, t = triplet, q = quartet, dd = doublet of doublets, dt = doublet of triplets, ddt = doublet of doublet of triplets, dtd = doublet of triplet of doublets, m = multiplet, br = broad), coupling constant (*J*) in Hertz (Hz), and integration. <sup>13</sup>C NMR spectra chemical shifts (δ) are reported in parts per million (ppm) were referenced to carbon resonances in the NMR solvent (CD<sub>3</sub>CN δ = 118.3, DMSO-*d*<sub>6</sub>, δ = 39.5, CD<sub>3</sub>OD δ = 49.0; center line). Carbons exhibiting significant line broadening brought about by boron substituents were not reported (quadrupolar relaxation). Rotameric peaks were resolved into single peaks using variable temperature NMR for compounds **4g-4k**.

**Mass Spectroscopy:** High resolution mass spectra were obtained on a VG 70- 250S (double focusing) mass spectrometer at 70 eV or on an ABI/Sciex Qstar mass spectrometer with ESI source, MS/MS and accurate mass capabilities. Low resolution mass spectra were obtained on an Agilent Technologies 1200 series HPLC paired to a 6130 Mass Spectrometer.

33

34 **RP-HPLC/MS:** Low-resolution mass spectra (ESI) were collected on an Agilent Technologies 1200 series  
35 HPLC paired to a 6130 Mass Spectrometer. Compounds were resolved on Phenomenex's Kinetex 2.6u  
36 C18 50x4.6mm column at room temperature with a flow of 1 mL/min. The gradient consisted of eluents  
37 A (0.1% formic acid in double distilled water) and B (0.1% formic acid in HPLC-grade acetonitrile).

38 *Method A:* A linear gradient starting from 5% of B to 95% over 15 min at a flow rate of 1.0 mL/min.

39

40

## Synthesis of parent $\alpha$ -boryl aldehyde (**1a**)

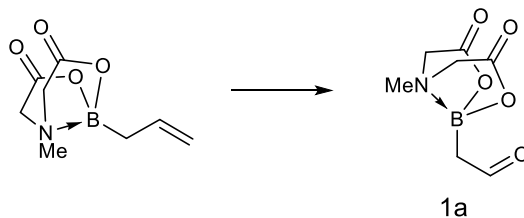

41

42 **Note:** Although the synthesis of parent boryl aldehyde (**1a**) was previously reported by the Yudin lab<sup>1</sup>,  
43 we have since improved the purification of **1a** using the procedure below.

### 44 **Step 1: Allyl-MIDA boronate**

45 Allyl-MIDA boronate was prepared according to literature<sup>1</sup>.

### 46 **Step 2: Ozonolysis**

47 In a 3-L round-bottom flask equipped with a magnetic stir bar under nitrogen atmosphere was added  
48 allyl-MIDA boronate (37 g, 188 mmol) followed by reagent grade DCM (1.4 L) and MeOH (450 mL).  
49 The mixture was stirred for 10 minutes and resulted in a clear solution. The gas diffuser was placed into  
50 the solution and attached to an ozone generator. The generator was then set to 0.55 g/min and allowed to  
51 stir at -78 °C for 3.5 hours at which time the reaction mixture started to turn blue. The ozone was then  
52 stopped and N<sub>2</sub>(g) was bubbled through the solution until colourless. A sample was then analyzed by <sup>1</sup>H  
53 NMR and showed complete consumption of starting material. The flask was then charged with Me<sub>2</sub>S  
54 (58.34 g, 69 mL, 939 mmol, 5.0 equiv) and stirred at -78 °C for one hour then warmed to room  
55 temperature overnight. After stirring overnight, a white suspension had formed. The solvent was then  
56 removed *in vacuo* to yield a white solid. DCM\* (150 mL) was introduced and the suspension was filtered  
57 to yield the product plus a minor impurity. The white solid was dissolved in MeCN and stirred overnight  
58 to solubilize the product. The impurity was filtered off, the organic layer was collected and the solvent  
59 was removed *in vacuo* to afford pure product as a white solid.

60 \*The DCM layer can be collected and re-purified by to retrieve parent boryl aldehyde **1a** that was  
61 solubilized by any remaining DMSO.

62

### General preparation of $\alpha$ -substituted boryl aldehydes (**1b-g**)

63

$\alpha$ -Substituted boryl aldehydes **1b-g** used for the synthesis of  $\beta$ -amino(MIDA)boronates were prepared

64

according to literature method<sup>2,3</sup>. List of known  $\alpha$ -substituted boryl aldehydes used:

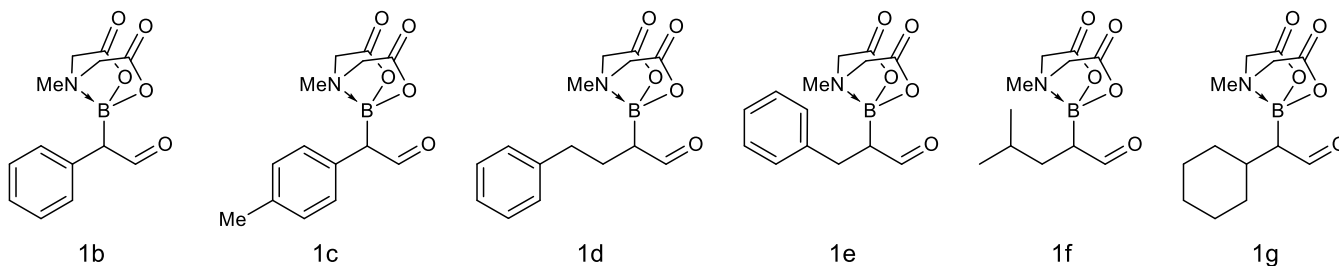

65

66

### General preparation of $\beta$ -amino(MIDA)boronates (**3**)

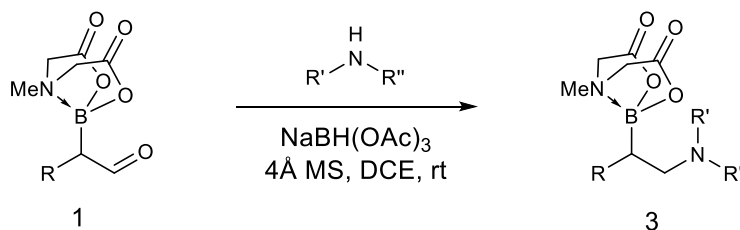

67

68

$\beta$ -amino(MIDA)boronates **3a-3k** were prepared according to literature methods<sup>4</sup>. List of known  $\beta$ -

69

amino(MIDA)boronates previously characterized:

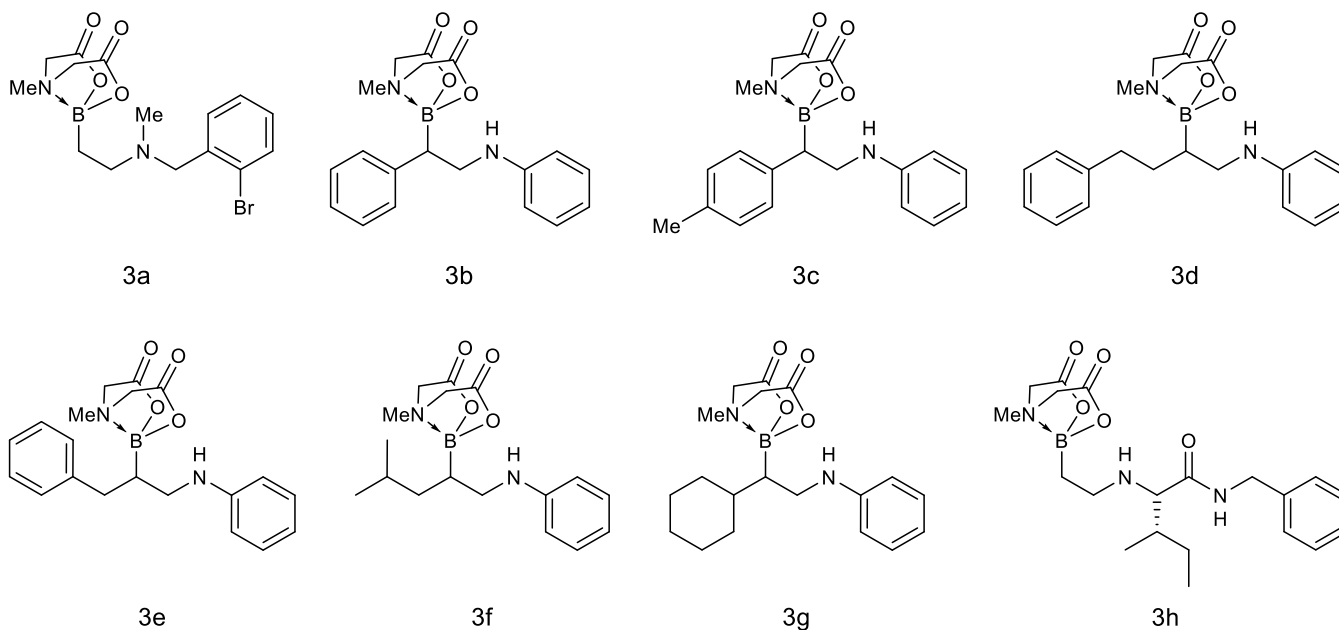

70

71

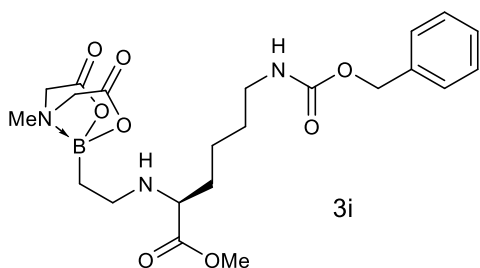

72  
73 **MIDA (2-(3,4-dihydroisoquinolin-2(1H)-yl)ethyl)boronate (3j)**

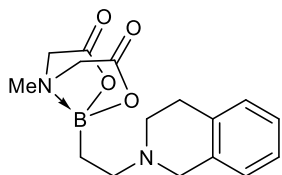

74  
75 White solid; yield = 38.2 mg, 60 %;  $R_f = 0.36$  (2:3, EtOAc:MeCN, with 1% TEA on pre-deactivated  
76 silica plate).  $^1\text{H NMR}$  (400 MHz,  $\text{CD}_3\text{CN}$ )  $\delta$  0.88 - 0.99 (m, 2H), 2.48 - 2.58 (m, 2H), 2.68 (t,  $J = 5.9$   
77 Hz, 2H), 2.84 (t,  $J = 5.9$  Hz, 2H), 2.87 (s, 3H), 3.51 - 3.61 (m, 2H), 3.81 (d,  $J = 16.8$  Hz, 2H), 3.91 (d,  $J$   
78 = 16.8 Hz, 2H), 6.98 - 7.06 (m, 1H), 7.06 - 7.15 (m, 3H);  $^{13}\text{C NMR}$  (101 MHz,  $\text{CD}_3\text{CN}$ )  $\delta$  169.2, 136.3,  
79 135.6, 129.5, 127.4, 126.9, 126.5, 62.8, 56.6, 55.0, 51.7, 46.7, 29.9;  $^{11}\text{B NMR}$  (128 MHz,  $\text{CD}_3\text{CN}$ )  $\delta$   
80 13.1; HRMS (DART-MS):  $m/z$  for  $\text{C}_{16}\text{H}_{22}\text{BN}_2\text{O}_4$ : calculated = 317.1673, found = 317.1675 [ $\text{M}+\text{H}^+$ ].

81 **MIDA (2-((4-bromophenyl)amino)ethyl)boronate (3k)**

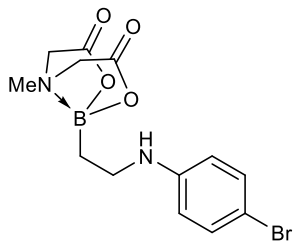

82  
83 White solid; yield = 286 mg, 81%,  $R_f = 0.69$  (1:1, EtOAc:MeCN, with 1% TEA on pre-deactivated silica  
84 plate).  $^1\text{H NMR}$  (500 MHz,  $\text{CD}_3\text{CN}$ )  $\delta$  0.90 - 1.00 (m, 2H), 2.87 (s, 3H), 3.05 - 3.15 (m, 2H), 3.81 (d,  $J =$   
85 16.9 Hz, 2H), 3.95 (d,  $J = 16.9$  Hz, 2H), 4.36 - 4.48 (m, 1H), 6.50 - 6.54 (m, 2H), 7.18 - 7.23 (m, 2H);  
86  $^{13}\text{C NMR}$  (126 MHz,  $\text{CD}_3\text{CN}$ )  $\delta$  169.1, 149.3, 132.5, 115.1, 107.9, 62.7, 46.8, 40.7;  $^{11}\text{B NMR}$  (128

87 MHz, CD<sub>3</sub>CN)  $\delta$  12.7; HRMS (DART-MS):  $m/z$  for C<sub>13</sub>H<sub>17</sub>BBrN<sub>2</sub>O<sub>4</sub>: calculated = 355.0446, found =  
88 355.0449 [M+H<sup>+</sup>].

89 **General preparation of  $\beta,\beta$ -aminocyano(MIDA)boronates (4)**

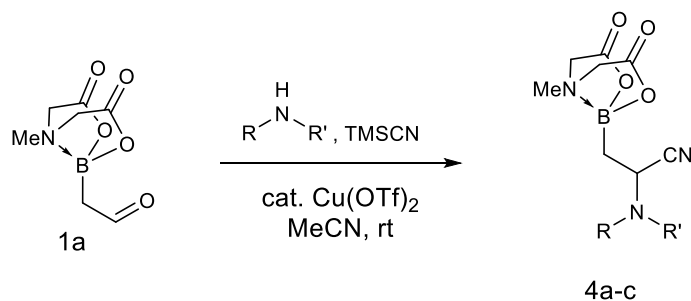

90

91 To a flame-dried, round bottom flask equipped with a magnetic stir bar under nitrogen atmosphere was  
92 added  $\alpha$ -boryl aldehyde **1a** (1.0 equiv.), copper (II) trifluoromethanesulfonic acid (0.05 equiv.) and an  
93 amine (2 equiv.) in MeCN (0.1 M). After 30 min of stirring, trimethylsilyl cyanide (2.0 equiv.) was  
94 added and then the reaction was left to stir at room temperature until completion. Another equivalent of  
95 amine and trimethylsilyl cyanide was added if the reaction did not go to completion overnight. The  
96 reaction was monitored by TLC. The solvent was removed by *in vacuo* and then extracted with ethyl  
97 acetate (x3) and brine. The organic layer was dried over Na<sub>2</sub>SO<sub>4</sub>, filtered, concentrated *in vacuo* and  
98 purified by flash chromatography or CombiFlash using hexanes:acetone to afford pure product.

99 **MIDA (2-((2-chloro-4-fluorobenzyl)amino)-2-cyanoethyl)boronate (4a)**

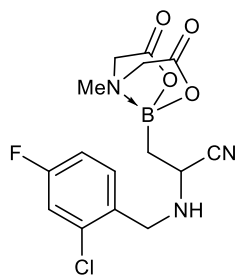

100

101 White solid; yield = 173 mg, 94 %;  $R_f$  = 0.49 (3:4, hex:ace). <sup>1</sup>H NMR (700 MHz, Acetonitrile-*d*<sub>3</sub>)  $\delta$  7.52  
102 – 7.47 (m, 1H), 7.23 (dd,  $J$  = 8.8, 2.6 Hz, 1H), 7.11 – 7.04 (m, 1H), 4.07 – 4.03 (m, 1H), 3.96 – 3.79 (m,  
103 6H), 3.69 (dd,  $J$  = 8.4, 6.6 Hz, 1H), 2.90 (s, 3H), 1.30 (dd,  $J$  = 15.1, 6.6 Hz, 1H), 1.26 (dd,  $J$  = 15.1, 8.4  
104 Hz, 1H). <sup>13</sup>C NMR (126 MHz, Acetonitrile-*d*<sub>3</sub>)  $\delta$  169.1, 168.7, 162.3 (d, <sup>1</sup> $J_{C-F}$  = 246.9 Hz), 134.8 (d, <sup>3</sup> $J_{C-F}$

105 = 10.6 Hz), 133.6 (d,  $^4J_{C-F} = 3.6$  Hz), 132.5 (d,  $^3J_{C-F} = 8.9$  Hz), 122.4, 117.2 (d,  $^2J_{C-F} = 25.0$  Hz, ), 114.8  
106 (d,  $^2J_{C-F} = 21.0$  Hz), 62.9, 62.6, 49.0, 47.3, 46.9.  $^{11}\text{B}$  NMR (128 MHz, Acetonitrile- $d_3$ ):  $\delta$  12.0.  $^{19}\text{F}$  NMR  
107 (377 MHz, Acetonitrile- $d_3$ )  $\delta$  -114.5 (q,  $J = 8.5$  Hz, 1F). HRMS (ESI, positive):  $m/z$  for  
108  $\text{C}_{15}\text{H}_{17}\text{BClFN}_3\text{O}_4$ : calcd 367.1016, observed 367.1019 [M+H].

109 **MIDA (2-((2-chlorophenyl)amino)-2-cyanoethyl)boronate (4b)**

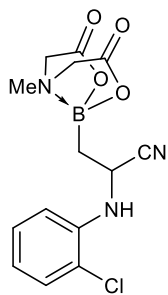

110  
111 White solid; yield = 77 mg, 45 %;  $R_f = 0.53$  (3:4, hex:ace).  $^1\text{H}$  NMR (700 MHz, Acetonitrile- $d_3$ )  $\delta$  7.35  
112 (dd,  $J = 7.9, 1.5$  Hz, 1H), 7.27 (tdd,  $J = 7.4, 1.5, 0.8$  Hz, 1H), 6.93 (dd,  $J = 8.2, 1.4$  Hz, 1H), 6.81 (ddd,  $J$   
113 = 8.0, 7.4, 1.4 Hz, 1H), 5.00 (d,  $J = 8.4$  Hz, 1H), 4.57 – 4.43 (m, 1H), 4.01 (d,  $J = 14.2$  Hz, 1H), 3.98 (d,  
114  $J = 14.1$  Hz, 1H), 3.87 (d,  $J = 13.8$  Hz, 1H), 3.84 (d,  $J = 13.7$  Hz, 1H), 2.94 (s, 3H), 1.50 (d,  $J = 3.4$  Hz,  
115 1H), 1.49 (d,  $J = 4.5$  Hz, 1H).  $^{13}\text{C}$  NMR (126 MHz, Acetonitrile- $d_3$ )  $\delta$  168.6, 168.5, 142.5, 130.3, 129.0,  
116 121.6, 120.5, 120.4, 113.8, 62.9, 62.8, 46.9, 42.9.  $^{11}\text{B}$  NMR (128 MHz, Acetonitrile- $d_3$ ):  $\delta$  11.7. HRMS  
117 (ESI, positive):  $m/z$  for  $\text{C}_{14}\text{H}_{16}\text{BClN}_3\text{O}_4$ : calcd 335.0953, observed 335.0953 [M+H].

118 **MIDA (2-((2-chlorobenzyl)(methyl)amino)-2-cyanoethyl)boronate (4c)**

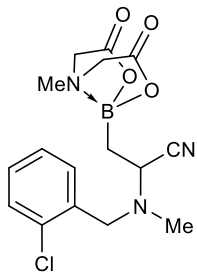

119  
120 White solid; yield = 34 mg, 19 %; LC-MS retention time = 3.71 min (Method A).  $^1\text{H}$  NMR (500 MHz,  
121 Acetonitrile- $d_3$ )  $\delta$  7.59 – 7.50 (m, 1H), 7.40 (dd,  $J = 7.8, 1.5$  Hz, 1H), 7.37 – 7.25 (m, 2H), 3.98 (d,  $J =$   
122 4.2 Hz, 1H), 3.95 (d,  $J = 4.2$  Hz, 1H), 3.88 – 3.76 (m, 4H), 3.64 (d,  $J = 13.9$  Hz, 1H), 2.87 (s, 3H), 2.25

123 (s, 3H), 1.32 (dd,  $J = 14.4, 9.4$  Hz, 1H), 1.15 (dd,  $J = 14.4, 6.0$  Hz, 1H).  $^{13}\text{C}$  NMR (126 MHz,  
124 Acetonitrile- $d_3$ )  $\delta$  168.8, 168.7, 136.4, 134.8, 132.0, 130.3, 129.7, 127.9, 118.9, 62.7, 62.7, 56.7, 54.4,  
125 46.7, 37.8.  $^{11}\text{B}$  NMR (128 MHz, Acetonitrile- $d_3$ )  $\delta$  11.7. HRMS (ESI, positive):  $m/z$  for  $\text{C}_{16}\text{H}_{20}\text{BCIN}_3\text{O}_4$ :  
126 calcd 363.1266, observed 363.1263 [M+H].

127 **General preparation of acylated  $\beta,\beta$ -aminocyano(MIDA)boronates (4d-I)**

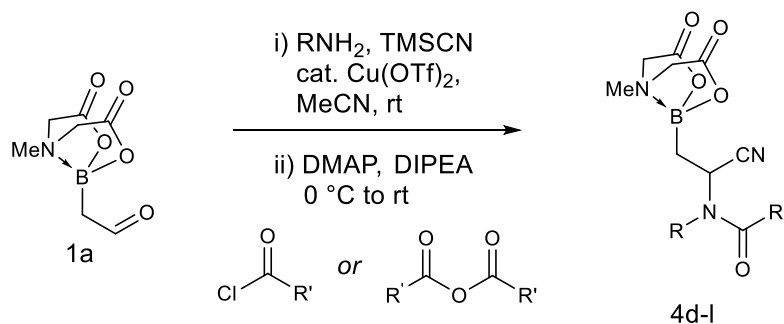

129 To a flame-dried, round bottom flask equipped with a magnetic stir bar under nitrogen atmosphere was  
130 added  $\alpha$ -boryl aldehyde **1a** (1.0 equiv.), copper (II) trifluoromethanesulfonic acid (0.05 equiv.) and an  
131 amine (2 equiv.) in MeCN (0.1 M). After 30 min of stirring, trimethylsilyl cyanide (2.0 equiv.) was  
132 added and then the reaction was left to stir at room temperature until completion. Another equivalent of  
133 amine and trimethylsilyl cyanide was added if the reaction did not go to completion overnight. The  
134 reaction was monitored by TLC. Next, catalytic 4-dimethylaminopyridine and N,N-  
135 diisopropylethylamine (5.0 equiv.) was added and the reaction was cooled to 0 °C. The corresponding  
136 acid chloride or anhydride (4.0 equiv.) was added to the solution dropwise or in 2 separate increments  
137 every 2 hours. The reaction was stirred at room temperature for 4 hours until completion. The solvent  
138 was removed by *in vacuo* and then extracted with ethyl acetate (x3) and brine. The organic layer was  
139 collected and then acidified to pH 1 using 0.1 M HCl. The aqueous layer was removed and then saturated  
140  $\text{NaHCO}_3$  was added to the organic layer until it reached pH 8-9. The organic layer was dried over  
141  $\text{Na}_2\text{SO}_4$ , filtered, concentrated *in vacuo* and purified by flash chromatography or CombiFlash using



142 hexanes:acetone to afford pure product. Compounds **4g-4k** exhibited rotamers at room temperature but  
143 this was resolved by heating the molecules to 60 °C.

144 **MIDA (2-cyano-2-(N-(4-methylbenzyl)acetamido)ethyl)boronate (4d)**

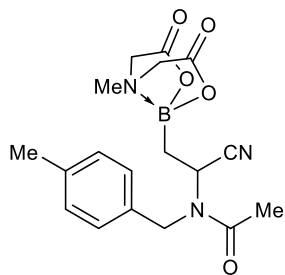

145

146 White solid; yield = 151 mg, 81 %;  $R_f = 0.18$  (3:4, hex:ace).  $^1\text{H NMR}$  (400 MHz, Acetonitrile- $d_3$ )  $\delta$  7.21  
147 (s, 4H), 5.01 (t,  $J = 8.0$  Hz, 1H), 4.70 (d,  $J = 17.2$  Hz, 1H), 4.52 (d,  $J = 17.3$  Hz, 1H), 3.97 (d,  $J = 17.1$   
148 Hz, 2H), 3.83 (d,  $J = 4.9$  Hz, 1H), 3.79 (d,  $J = 5.0$  Hz, 1H), 2.85 (s, 3H), 2.33 (s, 3H), 1.34 (d,  $J = 8.0$  Hz,  
149 2H).  $^{13}\text{C NMR}$  (126 MHz, Acetone- $d_6$ ):  $\delta$  171.7, 168.7, 168.6, 138.2, 134.9, 130.3, 127.7, 120.3, 62.8 (s,  
150 2C, methylene carbons of MIDA ligand), 51.4, 46.8, 44.7, 22.4, 21.0.  $^{11}\text{B NMR}$  (128 MHz, Acetone- $d_6$ ):  
151  $\delta$  11.4. HRMS (ESI, positive):  $m/z$  for  $\text{C}_{18}\text{H}_{23}\text{BN}_3\text{O}_5$ : calcd 371.1762, observed 371.1753 [M+H].

152 **MIDA (2-(N-(2-bromobenzyl)acetamido)-2-cyanoethyl)boronate (4e)**

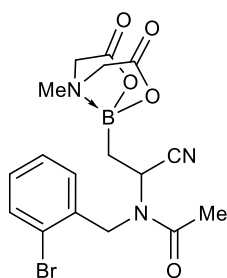

153

154 White solid; yield = 374 mg, 83 %;  $R_f = 0.23$  (4:3, hex:ace).  $^1\text{H NMR}$  (700 MHz, Acetonitrile- $d_3$ )  $\delta$  7.65  
155 (d,  $J = 7.9$  Hz, 1H), 7.42 (t,  $J = 7.6$  Hz, 1H), 7.35 (d,  $J = 7.7$  Hz, 1H), 7.26 (t,  $J = 7.7$  Hz, 1H), 5.10 (t,  $J$   
156 = 8.0 Hz, 1H), 4.83 – 4.43 (m, 2H), 3.98 (dd,  $J = 17.1, 2.9$  Hz, 2H), 3.82 (d,  $J = 17.1$  Hz, 2H), 2.86 (s,  
157 3H), 2.00 (s, 3H), 1.38 (dd,  $J = 14.2, 7.7$  Hz, 1H), 1.34 (dd,  $J = 14.4, 8.4$  Hz, 1H).  $^{13}\text{C NMR}$  (126 MHz,  
158 Acetonitrile- $d_3$ )  $\delta$  172.0, 168.6, 168.6, 136.6, 133.9, 130.3, 129.1, 128.9, 123.1, 120.1, 62.8, 62.8, 52.2,

159 46.9, 44.7, 22.2.  $^{11}\text{B}$  NMR (128 MHz, Acetonitrile- $d_3$ ):  $\delta$  11.6. HRMS (ESI, positive):  $m/z$  for  
160  $\text{C}_{17}\text{H}_{20}\text{BBrN}_3\text{O}_5$ : calcd 435.0710, observed 435.0701 [M+H].

161 **MIDA (2-(*N*-(2-chlorobenzyl)acetamido)-2-cyanoethyl)boronate (4f)**

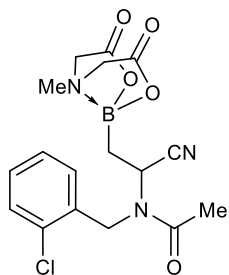

162  
163 White solid; yield = 156 mg, 79 %;  $R_f$  = 0.49 (3:4, hex:ace).  $^1\text{H}$  NMR (500 MHz, Acetonitrile- $d_3$ )  $\delta$  7.50  
164 – 7.21 (m, 4H), 5.09 (t,  $J$  = 8.0 Hz, 1H), 4.77 (d,  $J$  = 18.0 Hz, 1H), 4.69 (d,  $J$  = 18.0 Hz, 1H), 3.98 (dd,  $J$   
165 = 17.1, 1.6 Hz, 2H), 3.82 (d,  $J$  = 17.1 Hz, 2H), 2.86 (s, 3H), 2.01 (s, 3H), 1.37 (td,  $J$  = 12.3, 10.7, 8.0 Hz,  
166 2H).  $^{13}\text{C}$  NMR (126 MHz, Acetonitrile- $d_3$ )  $\delta$  171.9, 168.6, 168.6, 135.1, 133.3, 130.6, 130.1, 129.0,  
167 128.3, 120.1, 62.8, 62.8, 49.7, 46.9, 44.7, 22.2.  $^{11}\text{B}$  NMR (128 MHz, Acetonitrile- $d_3$ ):  $\delta$  11.4. HRMS  
168 (DART-TOF+):  $m/z$  for  $\text{C}_{17}\text{H}_{20}\text{BClN}_3\text{O}_5$ : calcd 392.1184, observed 392.1189 [M+H].

169 **MIDA (2-cyano-2-(*N*-(4-methylbenzyl)benzamido)ethyl)boronate (4g)**

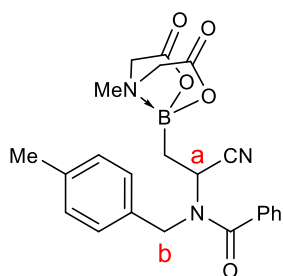

170  
171 White solid; yield = 198 mg, 91 %;  $R_f$  = 0.20 (4:3, hex:ace).  $^1\text{H}$  NMR (700 MHz, Acetonitrile- $d_3$ )  $\delta$  7.57  
172 – 7.52 (m, 2H), 7.50 – 7.40 (m, 3H), 7.18 (s, 4H), 4.80 (dd,  $J$  = 8.5, 7.3 Hz, 1H), 4.66 (d,  $J$  = 16.1 Hz,  
173 1H), 4.57 (d,  $J$  = 16.2 Hz, 1H), 3.99 (d,  $J$  = 2.1 Hz, 1H), 3.97 (d,  $J$  = 2.1 Hz, 1H), 3.84 (d,  $J$  = 6.9 Hz,  
174 1H), 3.82 (d,  $J$  = 6.9 Hz, 1H), 2.88 (s, 3H), 2.32 (s, 3H), 1.60 (dd,  $J$  = 14.4, 8.4 Hz, 1H), 1.42 (dd,  $J$  =  
175 14.3, 7.2 Hz, 1H).  $^{13}\text{C}$  NMR (126 MHz, Acetonitrile- $d_3$ )  $\delta$  172.2, 168.8, 168.5, 138.4, 136.8, 134.4,

176 130.8, 130.1, 129.4, 128.4, 127.7, 120.1, 62.8, 62.7, 46.8, 21.0.  $^{11}\text{B}$  NMR (128 MHz, Acetonitrile- $d_3$ ):  $\delta$   
177 11.5. HRMS (ESI, positive):  $m/z$  for  $\text{C}_{23}\text{H}_{25}\text{BN}_3\text{O}_5$ : calcd 433.1918, observed 433.1907 [M+H].  
178 \*Both  $\text{sp}^3$  carbons next to the nitrogen were not observed in the  $^{13}\text{C}$  NMR. This case is similar to  
179 compounds **4h-4k**.

180 **MIDA (2-(N-(2-chlorobenzyl)benzamido)-2-cyanoethyl)boronate (4h)**

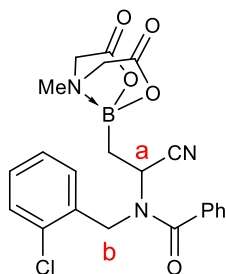

182 White solid; yield = 212 mg, 92 %;  $R_f$  = 0.47 (3:4, hex:ace)  $^1\text{H}$  NMR (400 MHz, Acetonitrile- $d_3$ )  $\delta$  7.60  
183 – 7.53 (m, 2H), 7.53 – 7.26 (m, 7H), 4.76 (m, 3H), 4.00 (dd,  $J$  = 17.1, 1.4 Hz, 2H), 3.84 (dd,  $J$  = 17.1, 4.1  
184 Hz, 2H), 2.87 (s, 3H), 1.67 (s, 1H), 1.37 (dd,  $J$  = 14.2, 6.7 Hz, 1H).  $^{13}\text{C}$  NMR (126 MHz, Acetonitrile- $d_3$ )  
185  $\delta$  172.4, 168.8, 4j168.5, 136.5, 134.7, 134.0, 131.0, 130.6, 130.3, 129.3, 128.2, 127.9 (s, 2C), 119.9,  
186 62.8, 62.7, 46.9.  $^{11}\text{B}$  NMR (128 MHz, Acetonitrile- $d_3$ ):  $\delta$  11.5. HRMS (ESI, positive):  $m/z$  for  
187  $\text{C}_{22}\text{H}_{22}\text{BCIN}_3\text{O}_5$ : calcd 453.1372, observed 453.1358 [M+H].

188 \*Both  $\text{sp}^3$  carbons next to the nitrogen were not observed in the  $^{13}\text{C}$  NMR. A cosy at 60 °C showed the  
189 protons of **a** coupling to the  $\text{CH}_2$ . An HMBC at 60 °C showed the protons of **b** coupling to the aromatic  
190 carbons.

191 **MIDA (2-(N-(2-chloro-5-(trifluoromethyl)benzyl)benzamido)-2-cyanoethyl)boronate (4i)**

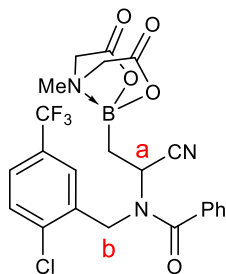

193 White solid; yield = 828 mg, 80 %;  $R_f = 0.55$  (3:4, hex:ace).  $^1\text{H}$  NMR (700 MHz, Acetonitrile- $d_3$ )  $\delta$  7.76  
194 (dt,  $J = 2.2, 0.7$  Hz, 1H), 7.61 (ddt,  $J = 8.3, 2.3, 0.7$  Hz, 1H), 7.57 (d,  $J = 8.4$  Hz, 1H), 7.55 – 7.51 (m,  
195 2H), 7.50 – 7.45 (m, 1H), 7.45 – 7.41 (m, 2H), 4.96 (dd,  $J = 8.7, 7.1$  Hz, 1H), 4.91 (d,  $J = 17.0$  Hz, 1H),  
196 4.80 (d,  $J = 16.9$  Hz, 1H), 3.99 (d,  $J = 17.0$  Hz, 2H), 3.85 (d,  $J = 10.9$  Hz, 1H), 3.83 (d,  $J = 10.9$  Hz, 1H),  
197 2.90 (s, 3H), 1.63 (t,  $J = 10.9$  Hz, 1H), 1.42 (dd,  $J = 14.3, 7.1$  Hz, 1H).  $^{13}\text{C}$  NMR (126 MHz,  
198 Acetonitrile- $d_3$ )  $\delta$  172.9, 168.7, 168.4, 131.8, 131.4, 130.3 (q,  $^2J_{\text{C-F}} = 32.9$  Hz), 129.8, 128.0, 127.4 (q,  
199  $^3J_{\text{C-F}} = 3.9$  Hz), 127.2 (q,  $^3J_{\text{C-F}} = 3.7$  Hz), 125.2 (q,  $^1J_{\text{C-F}} = 271.6$  Hz), 120.0, 63.3, 63.2, 47.2.  $^{11}\text{B}$  NMR  
200 (128 MHz, Acetonitrile- $d_3$ ):  $\delta$  11.3. HRMS (ESI, positive):  $m/z$  for  $\text{C}_{23}\text{H}_{21}\text{BClF}_3\text{N}_3\text{O}_5$ : calcd 521.1246,  
201 observed 521.1237 [M+H].

202 \*Both  $\text{sp}^3$  carbons next to the nitrogen were not observed in the  $^{13}\text{C}$  NMR. A cosy at 60 °C showed the  
203 protons of **a** coupling to the  $\text{CH}_2$ . An HMBC at 60 °C showed the protons of **b** coupling to the aromatic  
204 carbons.

205 **MIDA (2-(*N*-(2-chloro-4-fluorobenzyl)benzamido)-2-cyanoethyl)boronate (4j)**

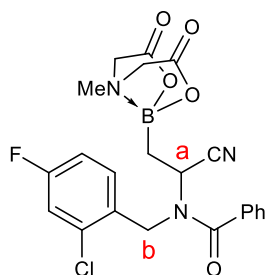

207 White solid; yield = 1073 mg, 91 %;  $R_f = 0.23$  (4:3, hex:ace).  $^1\text{H}$  NMR (700 MHz, Acetonitrile- $d_3$ )  $\delta$   
208 7.57 – 7.54 (m, 2H), 7.51 (dd,  $J = 8.7, 6.0$  Hz, 1H), 7.50 – 7.46 (m, 1H), 7.46 – 7.41 (m, 2H), 7.21 (dd,  $J$   
209 = 8.7, 2.6 Hz, 1H), 7.13 (td,  $J = 8.5, 2.6$  Hz, 1H), 4.88 (dd,  $J = 8.5, 7.2$  Hz, 1H), 4.81 (d,  $J = 16.6$  Hz,  
210 1H), 4.72 (d,  $J = 16.5$  Hz, 1H), 3.99 (dd,  $J = 17.1, 0.9$  Hz, 2H), 3.85 (d,  $J = 4.3$  Hz, 1H), 3.82 (d,  $J = 4.3$   
211 Hz, 1H), 2.89 (s, 3H), 1.61 (dd,  $J = 14.2, 8.6$  Hz, 1H), 1.41 (dd,  $J = 14.3, 7.2$  Hz, 1H).  $^{13}\text{C}$  NMR (126  
212 MHz, DMSO- $d_6$ )  $\delta$  170.6, 168.1, 167.8, 161.1 (d,  $^1J_{\text{C-F}} = 247.6$  Hz), 135.0, 133.0 (d,  $^3J_{\text{C-F}} = 10.6$  Hz),  
213 130.6 (d,  $^3J_{\text{C-F}} = 9.4$  Hz), 129.8 (d,  $^4J_{\text{C-F}} = 3.3$  Hz), 129.7, 128.1, 126.4, 118.5, 116.5 (d,  $^2J_{\text{C-F}} = 25.1$  Hz),

214 114.1 (d,  $^2J_{C-F} = 21.2$  Hz), 61.6, 61.5, 45.6.  $^{11}\text{B}$  NMR (160 MHz, Acetone- $d_6$ )  $\delta$  11.5.  $^{19}\text{F}$  NMR (377  
215 MHz, Acetone- $d_6$ )  $\delta$  -114.2. HRMS (DART-TOF+):  $m/z$  for  $\text{C}_{22}\text{H}_{21}\text{BClFN}_3\text{O}_5$ : calcd 472.1246, observed  
216 472.1257 [M+H].

217 \*Both  $\text{sp}^3$  carbons next to the nitrogen were not observed in the  $^{13}\text{C}$  NMR. A cosy at 60 °C showed the  
218 protons of **a** coupling to the  $\text{CH}_2$ . An HMBC at 60 °C showed the protons of **b** coupling to the aromatic  
219 carbons.

220 **MIDA (2-(N-(2-chlorophenethyl)benzamido)-2-cyanoethyl)boronate (4k)**

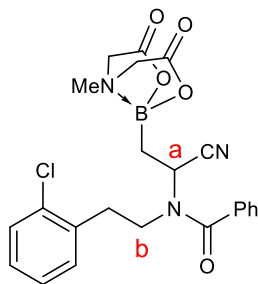

221  
222 White solid; yield = 224 mg, 96 %;  $R_f = 0.20$  (4:3, hex:ace).  $^1\text{H}$  NMR (700 MHz, Acetonitrile- $d_3$ )  $\delta$  7.49  
223 - 7.45 (m, 1H), 7.44 - 7.40 (m, 2H), 7.38 (dt,  $J = 7.0, 1.4$  Hz, 2H), 7.31 - 7.28 (m, 1H), 7.25 - 7.17 (m,  
224 3H), 5.06 (d,  $J = 8.2$  Hz, 1H), 3.99 (d,  $J = 8.0$  Hz, 1H), 3.97 (d,  $J = 8.1$  Hz, 1H), 3.86 (d,  $J = 17.5$  Hz,  
225 1H), 3.83 (d,  $J = 17.3$  Hz, 1H), 3.68 (ddd,  $J = 14.9, 9.3, 6.4$  Hz, 1H), 3.66 - 3.61 (m, 1H), 3.13 - 3.01 (m,  
226 2H), 2.92 (s, 3H), 1.56 (s, 1H), 1.49 (dd,  $J = 14.2, 7.4$  Hz, 1H).  $^{13}\text{C}$  NMR (126 MHz, Acetonitrile- $d_3$ )  $\delta$   
227 172.2, 168.8, 168.6, 136.8, 136.6, 134.6, 132.3, 130.5, 130.4, 129.4, 129.4, 128.2, 127.5, 120.8, 62.8,  
228 62.7, 46.9, 33.7.  $^{11}\text{B}$  NMR (128 MHz, Acetonitrile- $d_3$ )  $\delta$  11.6. HRMS (ESI, positive):  $m/z$  for  
229  $\text{C}_{23}\text{H}_{24}\text{BClN}_3\text{O}_5$ : calcd 467.1528, observed 467.1526 [M+H].

230 \*Both  $\text{sp}^3$  carbons next to the nitrogen were not observed in the  $^{13}\text{C}$  NMR. A cosy at 60 °C showed the  
231 protons of **a** coupling to the  $\text{CH}_2$ . An HMBC at 60 °C showed the protons of **b** coupling to the aromatic  
232 carbons.

233 **MIDA (2-(N-(2-bromobenzyl)-2,2,2-trifluoroacetamido)-2-cyanoethyl)boronate (4l)**

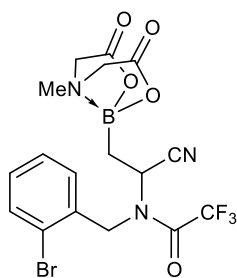

234

235 White solid; yield = 207 mg, 81 %;  $R_f = 0.34$  (4:3, hex:ace).  $^1\text{H}$  NMR (400 MHz, Acetonitrile- $d_3$ )  $\delta$  7.67  
 236 (dt,  $J = 8.1, 2.4$  Hz, 1H), 7.43 (dt,  $J = 16.7, 7.3$  Hz, 2H), 7.29 (tdd,  $J = 13.5, 8.9, 4.9$  Hz, 1H), 4.92 (d,  $J =$   
 237 17.5 Hz, 1H), 4.81 (d,  $J = 17.6$  Hz, 1H), 4.58 (t,  $J = 8.0$  Hz, 1H), 4.02 (d,  $J = 5.3$  Hz, 1H), 3.97 (d,  $J =$   
 238 5.3 Hz, 1H), 3.85 (d,  $J = 4.2$  Hz, 1H), 3.81 (d,  $J = 4.2$  Hz, 1H), 2.86 (s, 3H), 1.62 (dd,  $J = 14.1, 8.7$  Hz,  
 239 1H), 1.39 (ddd,  $J = 15.6, 10.0, 7.3$  Hz, 1H).  $^{13}\text{C}$  NMR (126 MHz, Acetone- $d_6$ )  $\delta$  168.3, 168.1, 157.6 (q,  
 240  $^2J_{\text{C-F}} = 37.1$  Hz), 135.0, 134.1, 130.8, 129.3, 129.0, 123.0, 118.3, 116.8 (q,  $^1J_{\text{C-F}} = 287.6$  Hz), 62.8, 62.7,  
 241 53.1, 48.3, 46.7.  $^{11}\text{B}$  NMR (128 MHz, Acetonitrile- $d_3$ ):  $\delta$  11.3.  $^{19}\text{F}$  NMR (377 MHz, Acetonitrile- $d_3$ )  $\delta$  -  
 242 70.2 (s, 3F). HRMS (DART-TOF+):  $m/z$  for  $\text{C}_{17}\text{H}_{17}\text{BBrF}_3\text{N}_3\text{O}_5$ : calcd 490.0396, observed 490.0390  
 243 [M+H].

244

### Synthesis of parent acylboronate (5)

245 Parent acylboronate **5** was prepared according to literature methods.<sup>4</sup>

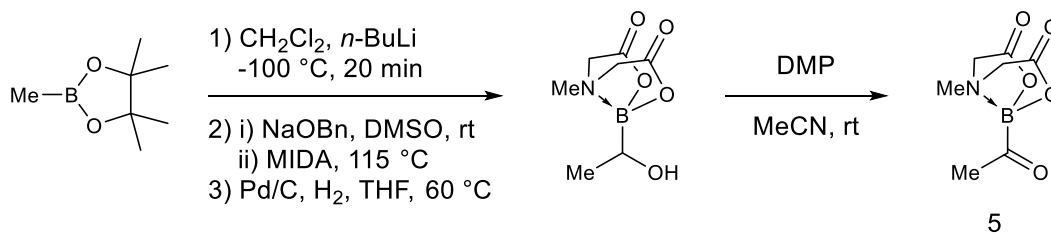

246

247

### Synthesis of $\alpha,\alpha$ -aminocyano(MIDA)boronate (7)

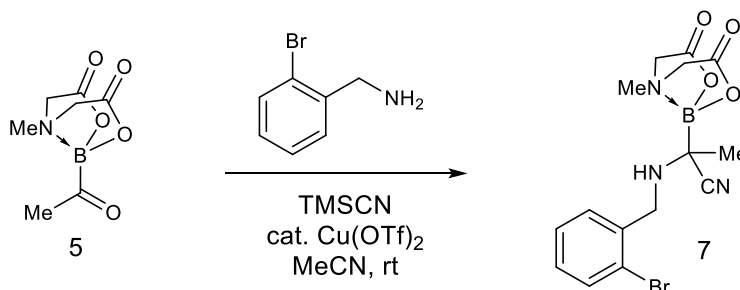

248

249 To a flame-dried, round bottom flask equipped with a magnetic stir bar under nitrogen atmosphere was  
250 added acylboronate **5** (1.0 equiv.), copper (II) trifluoromethanesulfonic acid (0.05 equiv.) and an amine  
251 (2 equiv.) in MeCN (0.1 M). After 30 min of stirring, trimethylsilyl cyanide (2.0 equiv.) was added and  
252 then the reaction was left to stir at room temperature until completion. Another equivalent of amine and  
253 trimethylsilyl cyanide was added if the reaction did not go to completion overnight. The reaction was  
254 monitored by TLC. The solvent was removed by *in vacuo* and then extracted with ethyl acetate (x3) and  
255 brine. The organic layer was dried over Na<sub>2</sub>SO<sub>4</sub>, filtered, concentrated *in vacuo* and purified by flash  
256 chromatography or CombiFlash using hexanes:acetone to afford pure product.

257 **MIDA (1-((2-bromobenzyl)amino)-1-cyanoethyl)boronate (7a)**

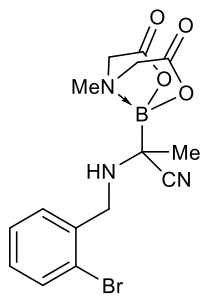

259 White solid; yield = 18 mg, 91 %; R<sub>f</sub> = 0.48 (4:3, hex:ace). <sup>1</sup>H NMR (500 MHz, Acetonitrile-*d*<sub>3</sub>) δ 7.57  
260 (dd, *J* = 8.0, 1.2 Hz, 1H), 7.47 (ddq, *J* = 7.6, 1.6, 0.5 Hz, 1H), 7.33 (td, *J* = 7.5, 1.3 Hz, 1H), 7.21 – 7.15  
261 (m, 1H), 4.13 – 3.85 (m, 7H), 3.28 (s, 3H), 1.58 (s, 3H). <sup>13</sup>C NMR (126 MHz, Acetonitrile-*d*<sub>3</sub>) δ 168.3,  
262 168.0, 139.9, 133.5, 131.9, 129.9, 128.6, 124.7, 123.9, 64.3, 64.1, 49.3, 48.3, 20.6. <sup>11</sup>B NMR (128 MHz,  
263 Acetonitrile-*d*<sub>3</sub>): δ 9.8. HRMS (ESI, positive): *m/z* for C<sub>15</sub>H<sub>18</sub>BBBrN<sub>3</sub>O<sub>4</sub>: calcd 393.0605, observed  
264 393.0606 [M+H].

265 **General preparation of α-functionalized alkyl(MIDA)boronates (8-10)**

266 α-Functionalized alkyl(MIDA)boronates **8-10** were prepared according to literature methods.<sup>5</sup> List of  
267 known α-functionalized alkyl(MIDA)boronates previously characterized:

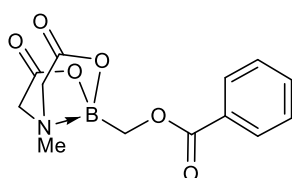

8a

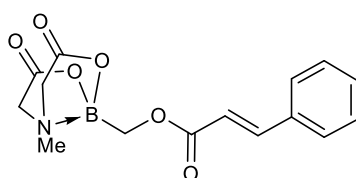

8b

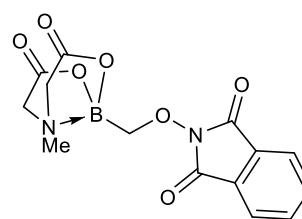

8c

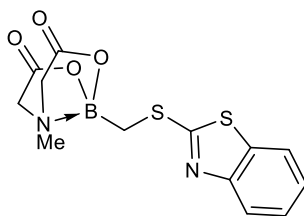

9a

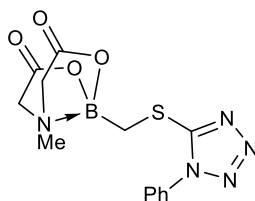

9b

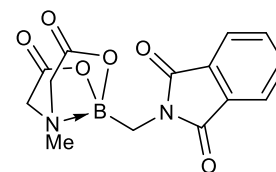

9c

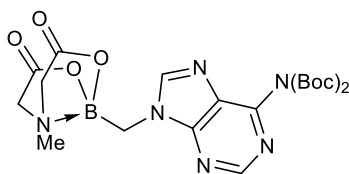

10a

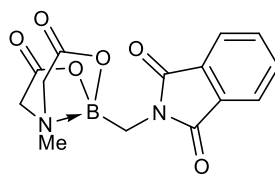

10b

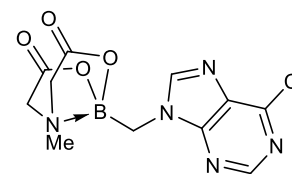

10c

268

269

### Preparation of acylated $\beta$ -amino(MIDA)boronate (11a)

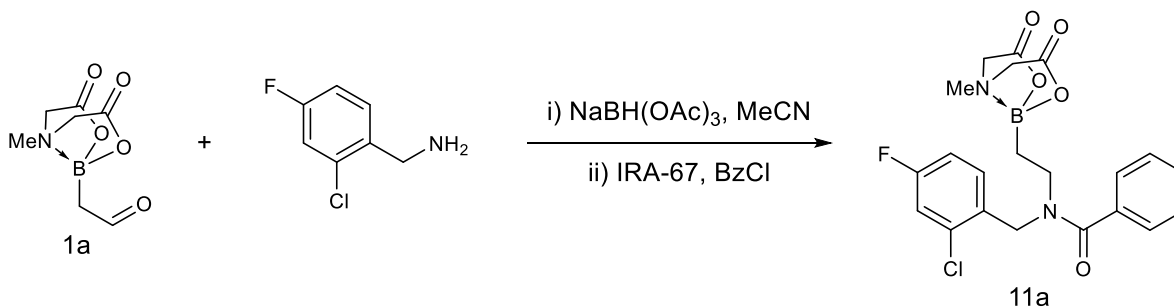

270

271 An oven-dried 50 mL round bottom flask equipped with a magnetic stir bar was charged with  $\alpha$ -boryl  
 272 acetaldehyde **1a** (80 mg, 1.0 equiv., 0.40 mmol) and (2-chloro-4-fluorophenyl)methanamine (60.6  $\mu$ L,  
 273 1.2 equiv., 0.48 mmol) in acetonitrile (8 mL, 0.05 M). The reaction was allowed to stir under a nitrogen  
 274 atmosphere for 1 hour at room temperature. Sodium tri(acetoxy)borohydride (128 mg, 1.5 equiv., 0.60  
 275 mmol) was added and the reaction was vigorously stirred for 6 hours. Amberlite IRA-67 resin (1g) was  
 276 then added to the reaction mixture and stirred for 10 minutes before the dropwise addition of benzoyl  
 277 chloride (93.4  $\mu$ L, 2.0 equiv., 0.81 mmol) to the reaction mixture. After 4 hours, Amberlite IRA-743 was



278 added to the crude mixture for the removal of borate/boronic acid by-products from NaBH(OAc)<sub>3</sub>. The  
279 solution was then stirred for approximately 5 minutes (or until the solution turned clear) and then filtered  
280 immediately through a plug of Celite while rinsing with acetonitrile. The filtrate was concentrated and  
281 adsorbed onto Celite *in vacuo* from an ethyl acetate solution. The resulting powder was subjected to  
282 reverse-phase flash-chromatography (water:acetonitrile 95:5 → 0:100, with 1% formic acid). The  
283 fractions containing product (determined by LC-MS) were pooled and lyophilized to afford **11a** (40 mg,  
284 22.3 mmol) as a white powder. Compound **11a** exhibited rotamers at room temperature but this was  
285 resolved by heating the molecules to 60 °C.

286 **MIDA (2-(N-(2-chloro-4-fluorobenzyl)benzamido)ethyl)boronate (11a)**

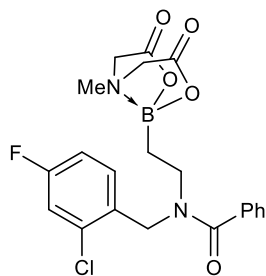

287

288 White solid; yield = 40 mg, 22 %; R<sub>f</sub> = 0.18 (4:3, hex:ace). <sup>1</sup>H NMR (400 MHz, Acetonitrile-*d*<sub>3</sub>) δ 7.45  
289 (s, 6H), 7.25 (dd, *J* = 8.7, 2.6 Hz, 1H), 7.14 (td, *J* = 8.5, 2.7 Hz, 1H), 3.90 (d, *J* = 17.0 Hz, 2H), 3.75 (d, *J*  
290 = 16.9 Hz, 2H), 3.41 (s, 2H), 2.80 (s, 3H), 0.97 (d, *J* = 26.8 Hz, 2H). <sup>13</sup>C NMR (126 MHz, DMSO-*d*<sub>6</sub>) δ  
291 170.4, 168.1 (s, 2C, carbonyls of MIDA ligand), 160.8 (d, <sup>1</sup>*J*<sub>C-F</sub> = 247.2 Hz), 136.4, 132.7 (d, <sup>3</sup>*J*<sub>C-F</sub> = 10.3  
292 Hz), 130.9, 129.9 (d, <sup>3</sup>*J*<sub>C-F</sub> = 9.1 Hz), 128.9, 128.1, 126.1, 116.4 (d, <sup>2</sup>*J*<sub>C-F</sub> = 25.1 Hz), 114.2 (d, <sup>2</sup>*J*<sub>C-F</sub> =  
293 21.1 Hz), 61.4 (s, 2C, methylene carbons of MIDA ligand), 45.3. <sup>11</sup>B NMR (128 MHz, Acetonitrile-*d*<sub>6</sub>):  
294 δ 11.9. <sup>19</sup>F NMR (377 MHz, Acetonitrile-*d*<sub>3</sub>) δ -114.9, -115.3 (major rotamer). HRMS (ESI, positive):  
295 *m/z* for C<sub>21</sub>H<sub>22</sub>BClN<sub>2</sub>O<sub>5</sub>: calcd 446.1325, observed 446.1320 [M+H].

296

### Preparation of β, β-aminocyanobenzamide (11b)

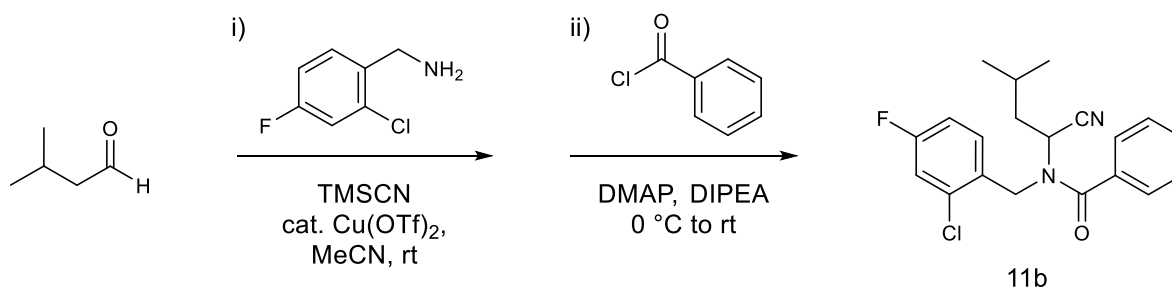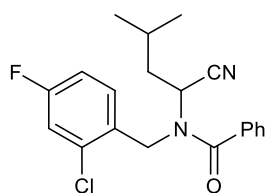

316 White solid; yield = 18 mg, 91 %;  $R_f = 0.71$  (3:1, hex:EtOAc).  $^1\text{H}$  NMR (700 MHz, Acetonitrile- $d_3$ )  $\delta$   
317 7.56 – 7.38 (m, 6H), 7.22 (dd,  $J = 8.7, 2.6$  Hz, 1H), 7.13 (tdd,  $J = 8.7, 2.6, 0.4$  Hz, 1H), 4.90 (dd,  $J = 8.7,$   
318 6.8 Hz, 1H), 4.80 (d,  $J = 16.6$  Hz, 1H), 4.72 (dt,  $J = 16.6, 0.9$  Hz, 1H), 1.94 – 1.90 (m, 1H), 1.76 (ddd,  $J$   
319 = 13.5, 7.5, 6.8 Hz, 1H), 1.70 (dp,  $J = 13.4, 6.6$  Hz, 1H), 0.91 (d,  $J = 6.6$  Hz, 3H), 0.86 (d,  $J = 6.6$  Hz,  
320 3H).  $^{13}\text{C}$  NMR (126 MHz, Acetonitrile- $d_3$ )  $\delta$  173.1, 163.3 (d,  $^1J_{\text{C-F}} = 248.2$  Hz), 136.5, 135.1 (d,  $^3J_{\text{C-F}} =$   
321 10.5 Hz), 132.2 (d,  $^3J_{\text{C-F}} = 9.1$  Hz), 131.6, 131.6, 130.0, 128.1, 118.9, 118.1 (d,  $^2J_{\text{C-F}} = 25.3$  Hz), 115.6  
322 (d,  $^2J_{\text{C-F}} = 21.4$  Hz), 48.9, 48.5, 41.2, 26.2, 22.8, 22.2.  $^{19}\text{F}$  NMR (377 MHz, Acetonitrile- $d_3$ )  $\delta$  -113.93 (s,  
323 3F). HRMS (DART-TOF+):  $m/z$  for  $\text{C}_{20}\text{H}_{21}\text{ClFN}_2\text{O}$ : calcd 359.1326, observed 359.1321 [M+H].

### 324 Synthesis of $\beta$ , $\beta$ -aminocyanoboronic acid (11c)

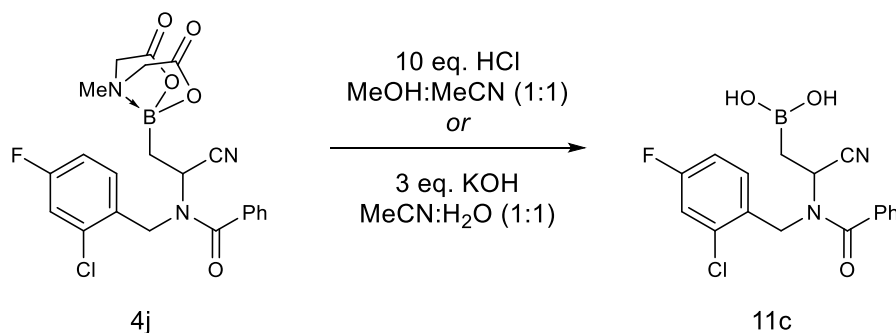

### 327 Acidic MIDA Deprotection

328 To an oven dried, scintillation vial equipped with a magnetic stir bar under nitrogen atmosphere was  
329 added MIDA boronate **4j**, hydrochloric acid (0.3 M, 10 equiv.) in MeOH:MeCN (1:1, v/v). The reaction  
330 was left to stir at room temperature overnight. The reaction was monitored by TLC and LC-MS. The  
331 solvent was removed under a stream of nitrogen. The crude mixture was purified using either of the  
332 following procedures: A) The crude mixture was triturated in MeCN and filtered through celite. The  
333 solvent was removed *in vacuo* to afford pure product. B) The crude mixture was re-dissolved in MeCN  
334 and loaded onto Celite. The reaction was purified via a short silica plug (flushed with 100% MeCN and  
335 eluted with 100% Ace) or reverse-phase HPLC (Method A) to afford pure product.

336 **Basic MIDA Deprotection**

337 To an oven dried, scintillation vial equipped with a magnetic stir bar under nitrogen atmosphere was  
338 added MIDA boronate **4j**, potassium hydroxide (3 equiv.) in MeCN:H<sub>2</sub>O (1:1, v/v). The reaction was left  
339 to stir at room temperature until completion. The reaction was monitored by TLC and LC-MS. A) The  
340 crude mixture was triturated in MeCN and filtered through celite. The solvent was removed *in vacuo* to  
341 afford pure product. B) The crude mixture was re-dissolved in MeCN and loaded onto Celite. The  
342 reaction was purified via a short silica plug (flushed with 100% MeCN and eluted with 100% Ace) or  
343 reverse-phase HPLC (Method A) to afford pure product. Compound **11c** exhibited rotamers at room  
344 temperature but this was resolved by heating the molecules to 50-55 °C. There are multiple peaks present  
345 in the <sup>19</sup>F spectrum due to the presence of rotamers and an equilibrium between multiple boron species.

346 **(2-(N-(2-chloro-4-fluorobenzyl)benzamido)-2-cyanoethyl)boronic acid (11c)**

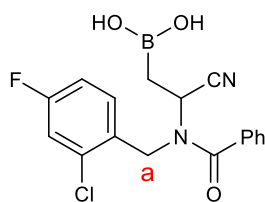

348 White solid; yield = 38 mg, quantitative; LC-MS retention time = 7.83 min (Method A). <sup>1</sup>H NMR (500  
349 MHz, CD<sub>3</sub>OD, ref: δ 3.31) δ 7.53 – 7.45 (m, 6H), 7.20 (ddd, *J* = 10.6, 8.5, 2.6 Hz, 1H), 7.15 – 7.09 (m,  
350 1H), 4.98 (t, *J* = 7.7 Hz, 1H), 4.81 (s, 2H), 1.61 (d, *J* = 7.7 Hz, 2H). <sup>13</sup>C NMR (126 MHz, Methanol-*d*<sub>4</sub>) δ  
351 174.3, 163.6 (d, <sup>1</sup>*J*<sub>C-F</sub> = 249.3 Hz), 136.4, 135.2 (d, <sup>3</sup>*J*<sub>C-F</sub> = 9.7 Hz), 132.1 (d, <sup>3</sup>*J*<sub>C-F</sub> = 8.9 Hz), 131.7, 131.4  
352 (d, <sup>4</sup>*J*<sub>C-F</sub> = 3.7 Hz), 129.8, 127.9, 119.7, 118.0 (d, <sup>2</sup>*J*<sub>C-F</sub> = 25.4 Hz), 115.4 (d, <sup>2</sup>*J*<sub>C-F</sub> = 21.6 Hz), 47.3. <sup>11</sup>B  
353 NMR (128 MHz, Acetonitrile-*d*<sub>3</sub>) δ 29.5. <sup>19</sup>F NMR (377 MHz, Methanol-*d*<sub>4</sub>) δ -113.8, -114.1, -115.5, -  
354 115.8, -117.0. LRMS (ESI, positive): *m/z* for C<sub>18</sub>H<sub>23</sub>BN<sub>3</sub>O<sub>5</sub>: observed 361.0 [M+H].

355 \*The <sup>13</sup>C of the benzyl carbon **a** can be seen in the HSQC at 55 °C overlapping with the solvent peak.

356

357

**Activity-Based Protein Profiling Experiments**

358

### 359 **Preparation of Tissue and Cell Lysates**

360 Cell lysates were prepared by lysing cell pellets in cold PBS using a probe sonicator. Mouse brains were  
361 homogenized by bead beating with a Bullet Blender (Nextadvance) according to the manufacturer  
362 specifications. Samples were fractionated by ultracentrifugation (100,000 g's, 45 min, 4 °C), flash  
363 frozen, and stored at -80 °C prior to use. The harvesting of mouse tissues was performed with the  
364 approval of the Institutional Animal Care and Use Committee at The Scripps Research Institute in  
365 accordance with the Guide for the Care and Use of Laboratory Animals.

366

### 367 **Transient Overexpression of Proteins**

368 HEK 293T cells were seeded at  $3 \times 10^5$  per well on 6 well plates and grown for 24 hours. They were then  
369 transfected with mABHD3 (pCMV-Sport6), hABHD3 (pCMV6-XL4) or control vector, by incubating  
370 0.5 µg of plasmid DNA with 3 µL of PEI MAX (1 mg/mL, Polysciences, Inc.) in serum-free DMEM for  
371 30 min, and then adding this mixture to cells. After another 48 hours cells were either treated with  
372 compound *in situ*, as described below, or harvested for *in vitro* studies.

373

### 374 ***In Vitro* Inhibitor and Probe Treatment of Tissue and Cell Lysates**

375 Proteome lysates (50 µL, 1 mg/mL), prepared as described above, were treated with either 1 µL of  
376 DMSO or inhibitor (50x final concentration, in DMSO). Following a 30 minute incubation at 37 °C,  
377 lysates were chased with FP-Rh (1 µM, 30 min) at room temperature. Samples were then quenched by  
378 adding 4x SDS-PAGE loading buffer (17 µl), resolved by SDS-PAGE, and visualized using a ChemiDoc  
379 MP (Bio-Rad). Signal intensity was quantified with ImageJ 1.45s, and IC50 values were determined with  
380 GraphPad Prism 7.

381

## 382 ***In Situ* Inhibitor Treatment of Human Cell Lines**

383 Human SW620 and HEK 293T cells were grown in SILAC-RPMI or DMEM media, respectively,  
384 supplemented with 10% FBS. SILAC SW620s were split 72 hours prior to inhibitor treatment. The  
385 media was replaced with fresh media containing either DMSO or inhibitor, and the cells were incubated  
386 for 2 hours at 37 °C. Next, cells were washed with cold PBS, harvested with a cell scraper, centrifuged,  
387 and aspirated to remove PBS. Cell pellets were flash frozen and stored at -80 prior to lysis and probe  
388 treatment. HEK 293Ts were treated similarly but also transfected after 24 hours, as described above.

389

## 390 **ABPP-SILAC Sample Preparation and Data Analysis**

391 ABPP-SILAC samples were prepared and analyzed as described previously (Cognetta et al., 2015).  
392 Briefly, isotopically heavy and light SW620 cell lysates, prepared from *in situ* treated cells as described  
393 above, were incubated with FP-biotin (6 µM, 1 h) at room temperature. Light and heavy cell lysates were  
394 combined into a solution of MeOH/CHCl<sub>3</sub> (4:1, 2.5 ml), additional cold PBS was added (1 mL), and the  
395 solution was centrifuged for 20 minutes (5,000 g, 4 °C) resulting in the precipitation of the protein  
396 fraction. The organic and aqueous layers were removed by aspiration, and the resulting pellets were then  
397 washed with 1:1 MeOH/CHCl<sub>3</sub> (1 mL, 2x), resuspended in 0.5 mL of 6 M urea in PBS, reduced using  
398 tris(2-carboxyethyl)phosphine (10 mM) for 30 min at 37 °C, and alkylated with iodoacetamide (40 mM)  
399 for 30 min at 25 °C in the dark. Biotinylated proteins were enriched with PBS-washed streptavidin beads  
400 (100 µL, Sigma-Aldrich) by rotating at room temperature for 1.5 hr in PBS (5.5 ml) with 0.2% SDS. The  
401 beads were washed sequentially with 10 mL of PBS with 0.2% SDS (3x), 10 mL of PBS (3x), and 10  
402 mL of DI H<sub>2</sub>O (3x). On-bead digestion was performed using sequencing-grade trypsin (2 µg; Promega)  
403 in 2 M urea in PBS with 2 mM CaCl<sub>2</sub> for 12–14 h at 37 °C (200 µl). Peptides obtained from this  
404 procedure were acidified using formic acid (5% final) and stored at -20 °C before analysis. Digested  
405 peptides were loaded on to a biphasic (strong cation exchange/reverse phase) capillary column and

406 analyzed by 2D LC-MS/MS on an LTQ-Orbitrap (Thermo Scientific). Samples were then searched using  
407 the ProLuCID algorithm against a human reverse-concatenated non-redundant (gene-centric) FASTA  
408 database that was assembled from the Uniprot database. SILAC ratios were quantified using in-house  
409 CIMAGE software<sup>6</sup>.

410

#### 411 **Hydrolytic Stability Study of Compound 4j**

412 Compound **4j** (4.0 mg, 8.5  $\mu\text{mol}$ ) was added to a ½ dram vial equipped with a magnetic stir and dissolved in  
413 acetonitrile (100  $\mu\text{L}$ ). A 0.1 M sodium phosphate solution in H<sub>2</sub>O buffered to pH of 7.4 (300  $\mu\text{L}$ ) was then slowly  
414 added. The resulting solution was briefly sonicated and the reaction vial was then placed in an oil bath heated to 37  
415 °C. A 30  $\mu\text{L}$  aliquot was taken out and added to a separate vial with 800  $\mu\text{L}$  of water:acetonitrile for LC-MS analysis  
416 (time = 0 h). This process was repeated over 24 hours. See Supplementary Figure 4.

417

418

419

## Supplementary Figures

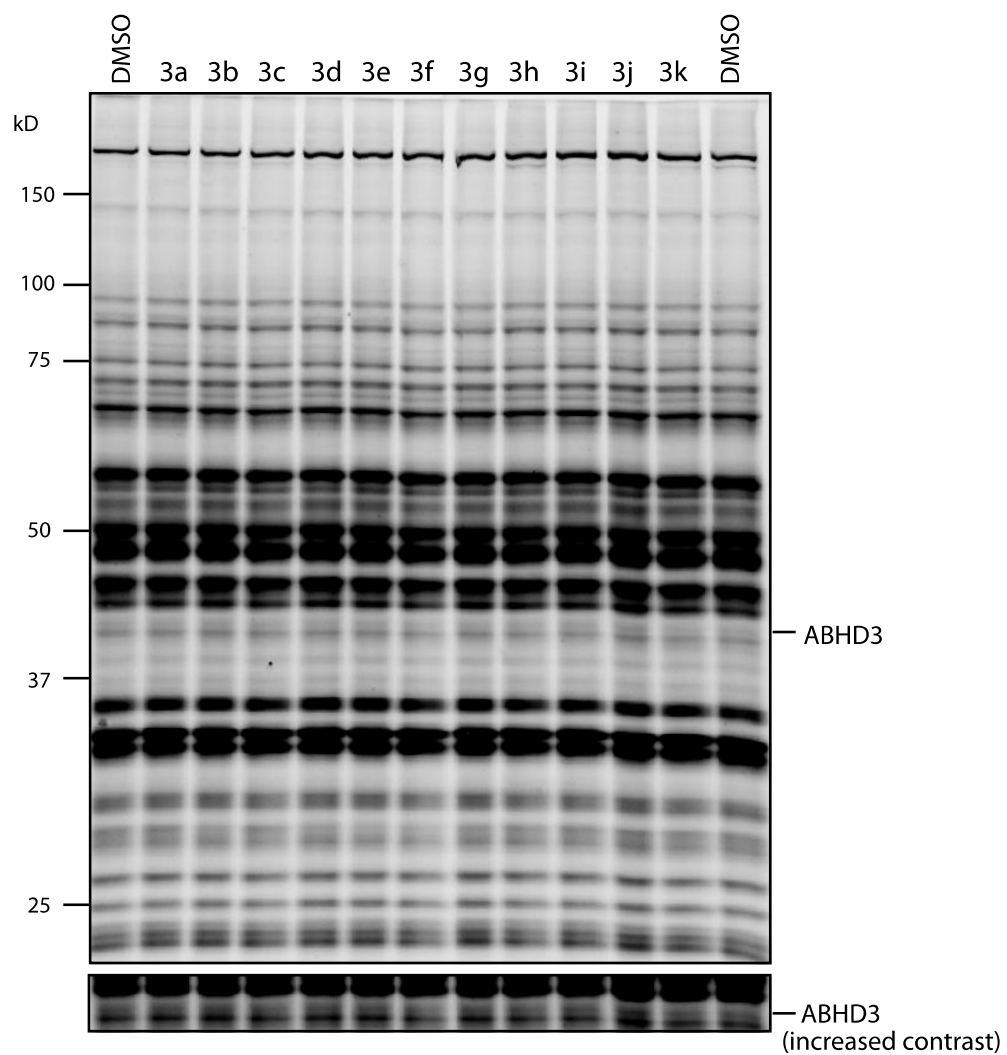

421

422 **Supplementary Figure 1.** ABPP gel of the membrane fraction of mouse brain treated with compounds  
423 **3a-3k** (20  $\mu$ M, 30 min, 37  $^{\circ}$ C) followed by the broad-spectrum, serine hydrolase-directed activity-based  
424 probe FP-rhodamine (1  $\mu$ M, 30 min, RT).



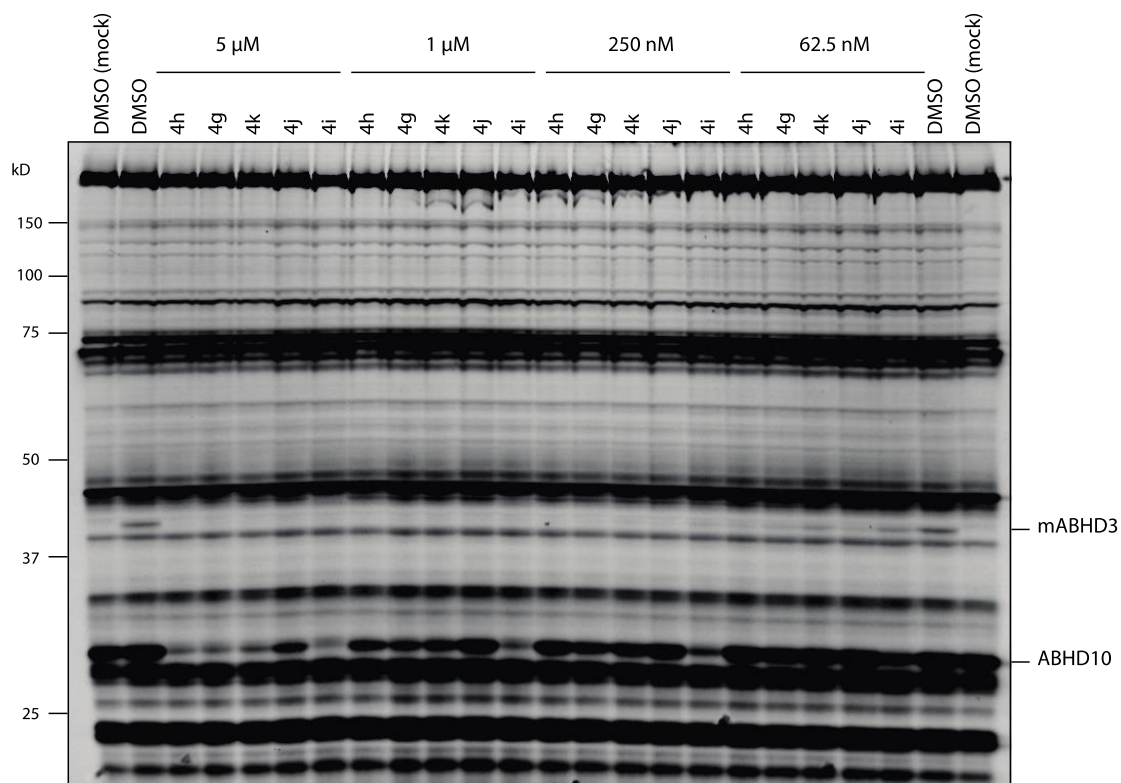

425

426 **Supplementary Figure 2.** ABPP gel showing concentration-dependent activity of representative  
 427 compounds from MIDA Boronate library against cell lysates from mABHD3-overexpressing HEK  
 428 293Ts. Note that compounds **4j**, **4h**, and **4g** show equivalent inhibitory activity against ABHD3, but **4j** is  
 429 more selective against ABHD10.

430

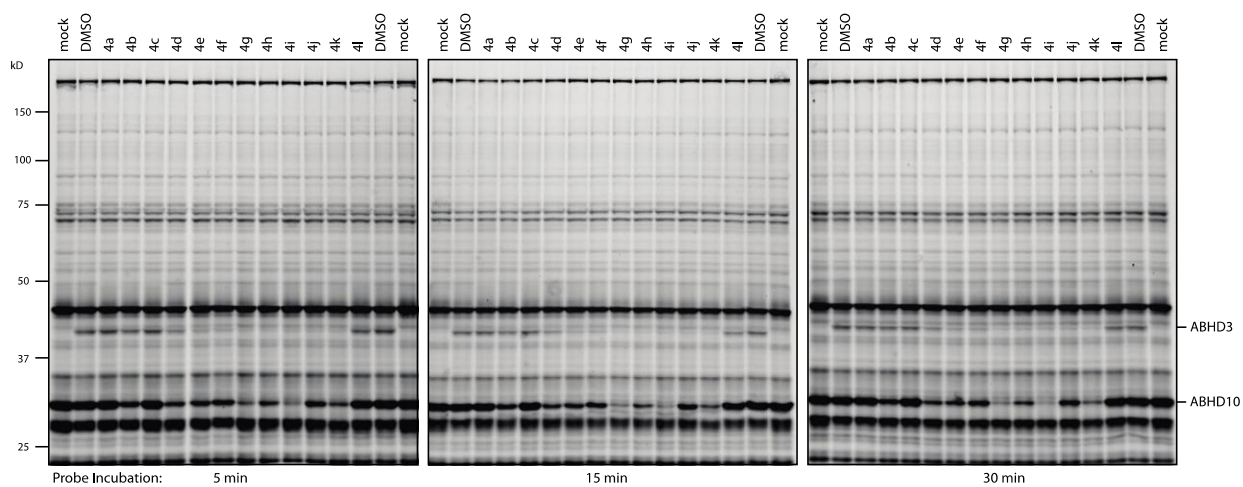

431

432 **Supplementary Figure 3.** ABPP gels testing the time-dependence of probe incubation on inhibition  
 433 profiles of MIDA-boronates. Cell lysates from ABHD3-transfected HEK 293Ts (membrane fraction)  
 434 were incubated with compounds 4a-4l (20  $\mu$ M, 30 min, 37  $^{\circ}$ C) and chased with FP-Rh for 5, 15, or 30  
 435 minutes, after which samples were analyzed by gel-based ABPP. Note: 5 min and 15 min gel images are  
 436 shown with increased contrast to match the intensity of the 30 min gel image.

437

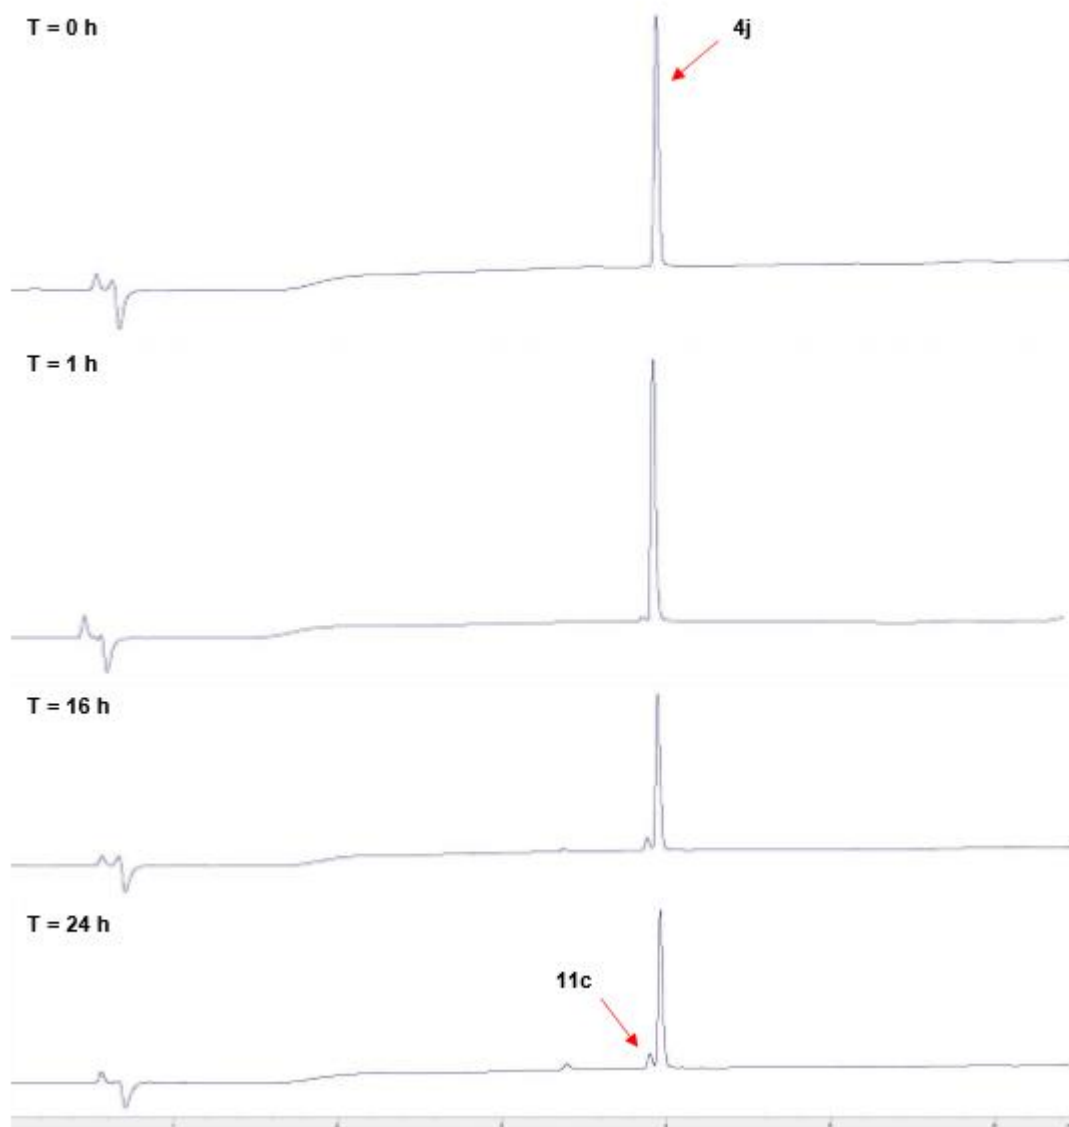

438

439 **Supplementary Figure 4.** Incubation of **4j** (20 mM) in acetonitrile:phosphate buffer (3:1) at pH 7.4 in a  
440 reaction volume of 400  $\mu$ L at 37  $^{\circ}$ C for 24 hours. Using liquid chromatography-mass spectrometry (LC-MS)  
441 analysis, less than 10% of boronic acid **11c** was released after 24 h. UV-Vis chromatogram at  $\lambda = 214$  nm is  
442 shown.

443

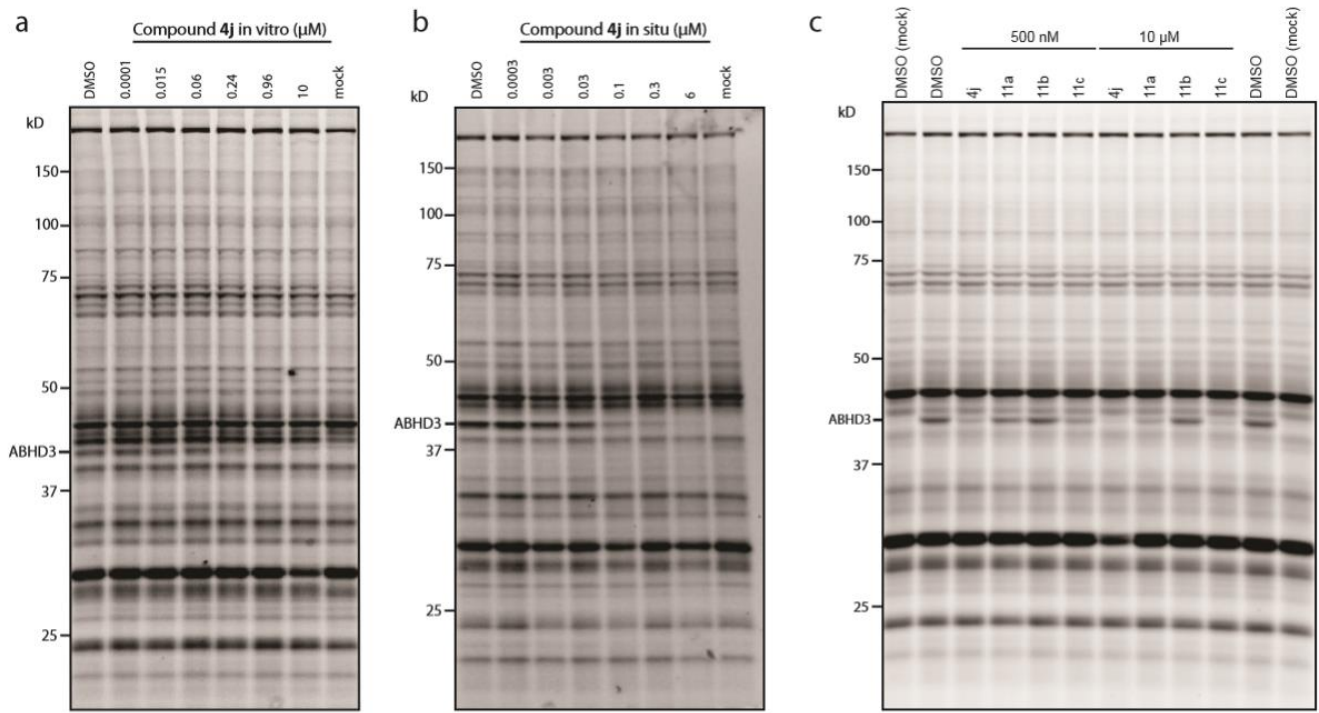

444

445 **Supplementary Figure 5.** a) Full gel for Fig. 5a. b) Full gel for Fig. 5b. c) Full gel for Fig. 6b.

446 Compound **3j**

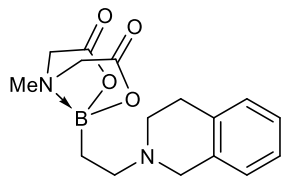

DBD-102.1.fid  
chem\_Proton\_Day CD3CN /opt/data ddiaz 10

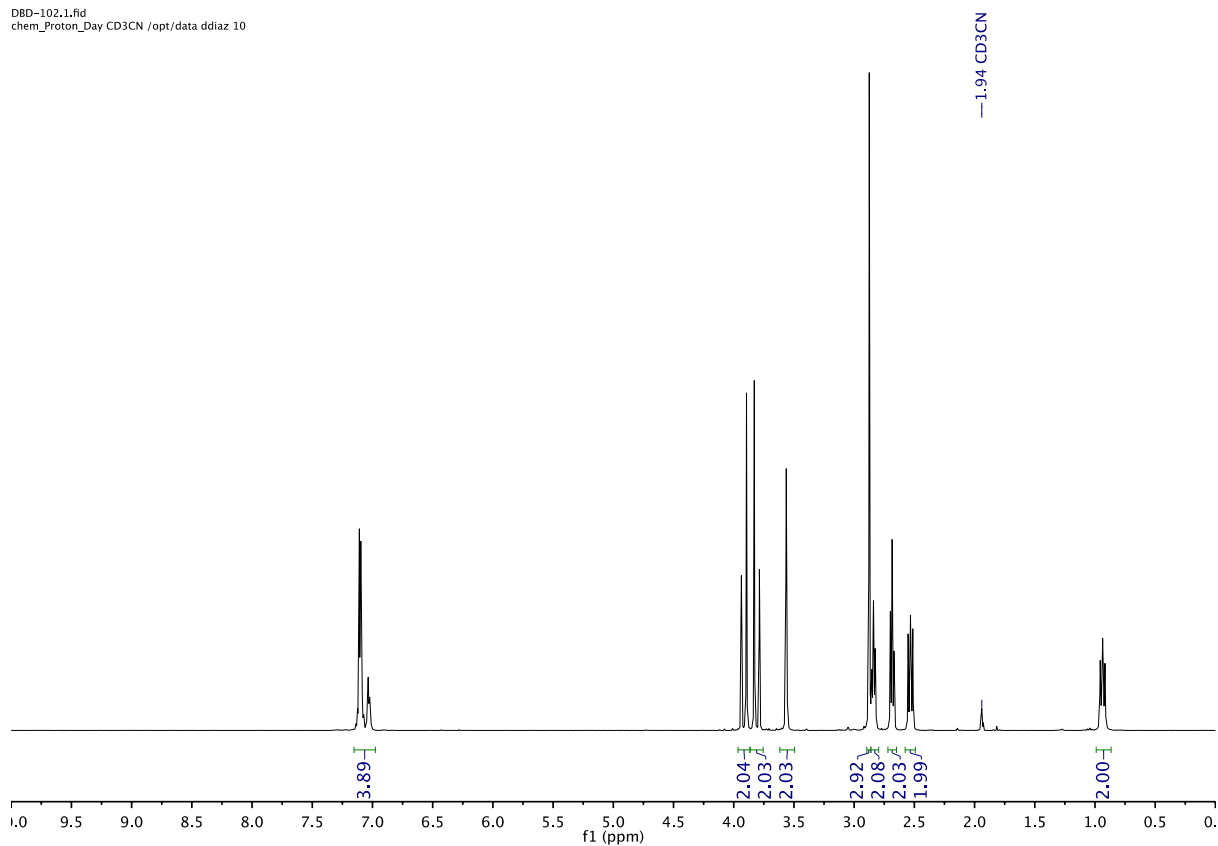

449

450

**Supplementary Figure 5:** <sup>1</sup>H NMR of **3j** in acetonitrile-*d*<sub>3</sub> at 25 °C.

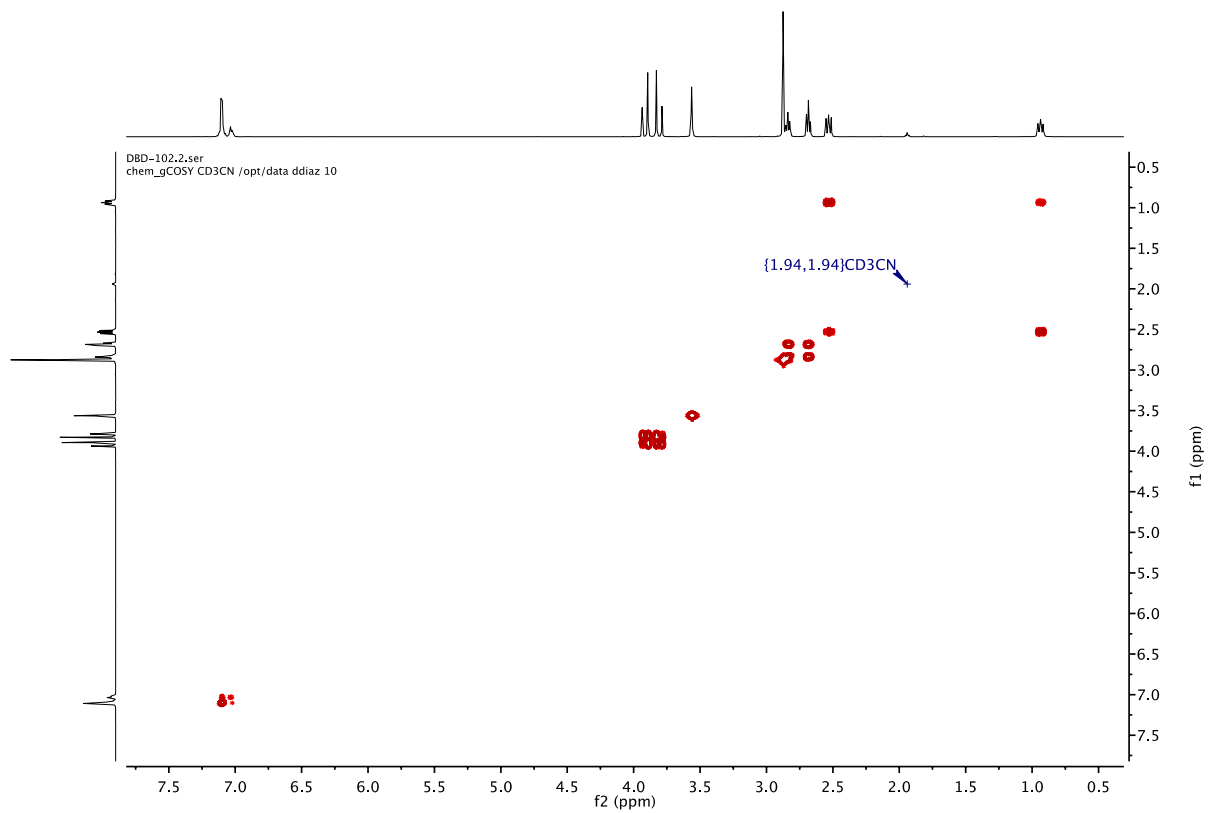

451

452

**Supplementary Figure 6:**  $^1\text{H}$ - $^1\text{H}$  COSY of **3j** in acetonitrile- $d_3$  at 25 °C.

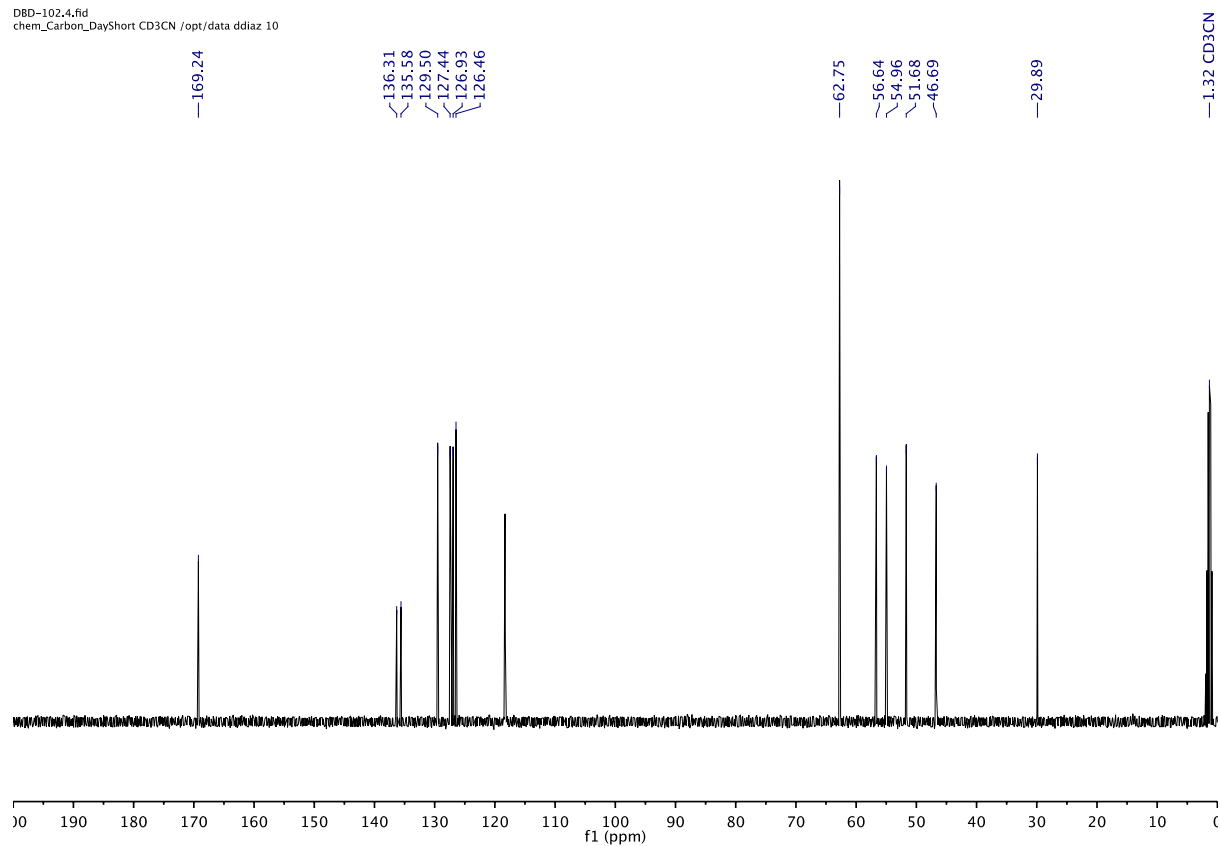

453

454

**Supplementary Figure 7:**  $^{13}\text{C}$  NMR of **3j** in acetonitrile- $d_6$  at 25 °C.

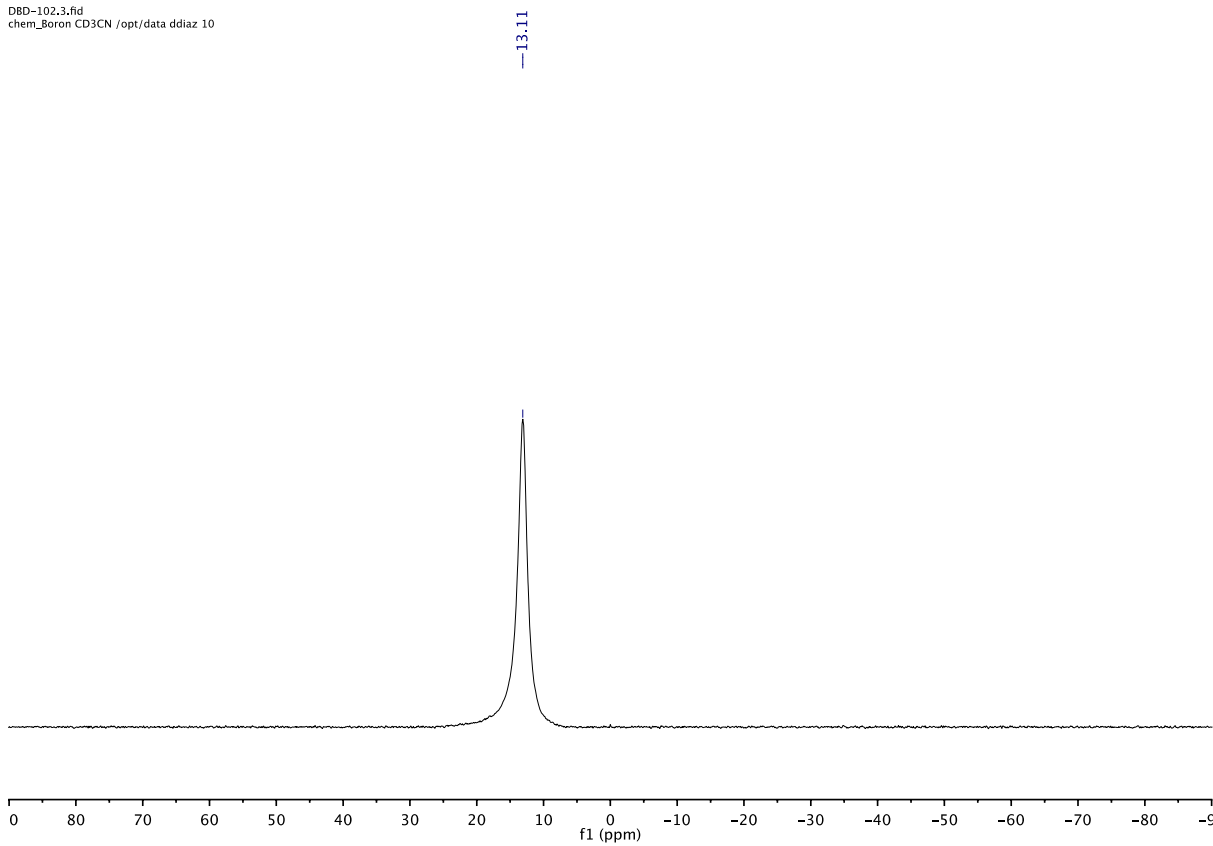

455

456

**Supplementary Figure 8:**  $^{11}\text{B}$  NMR of **3j** in acetonitrile- $d_3$  at 25 °C.



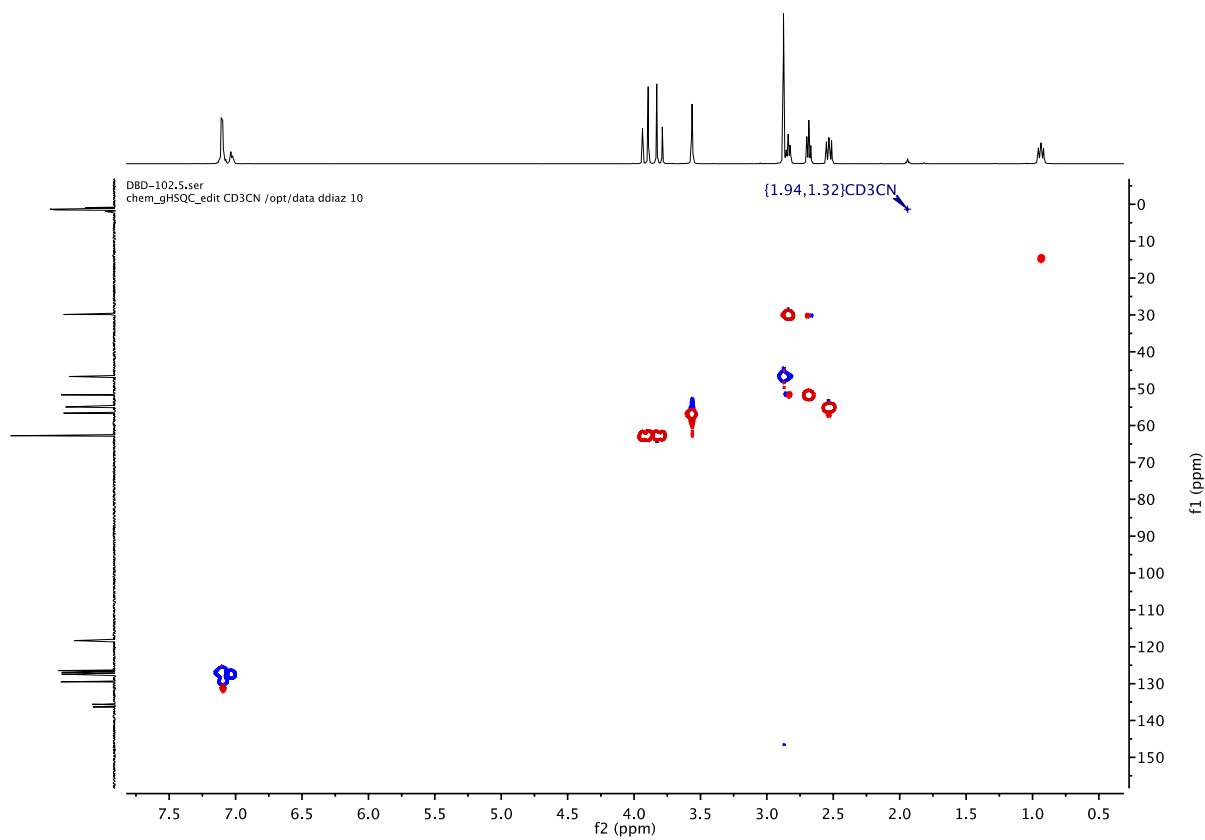

457

458

**Supplementary Figure 9:**  $^1\text{H}$ - $^{13}\text{C}$  HSQC NMR of **3j** in acetonitrile- $d_3$  at 25 °C.

459

460 Compound **3k**

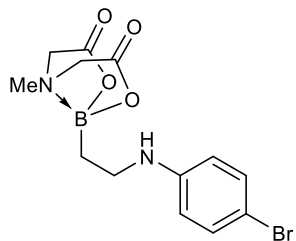

461

20150205\_vnmrs\_500\_DBD-101-PROTON\_01

-1.94 CD3CN

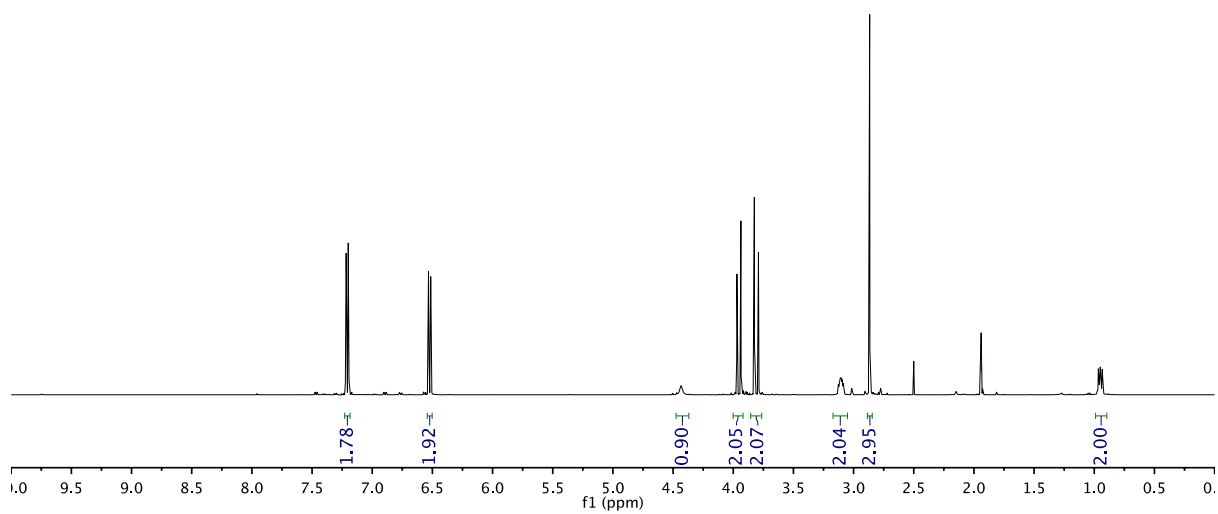

462

463

**Supplementary Figure 10:** <sup>1</sup>H NMR of **3k** in acetonitrile-*d*<sub>3</sub> at 25 °C.

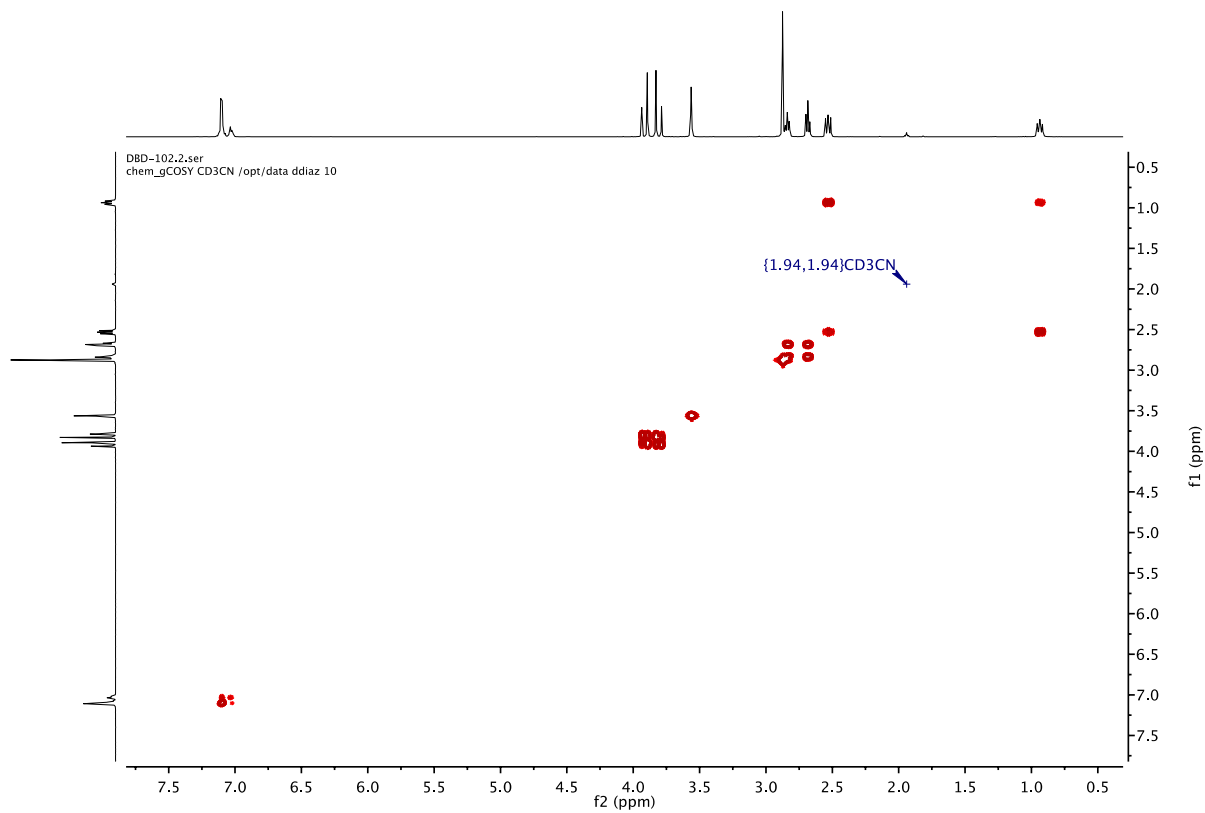

464

465

**Supplementary Figure 11:**  $^1\text{H}$ - $^1\text{H}$  COSY of **3k** in acetonitrile- $d_3$  at 25 °C.

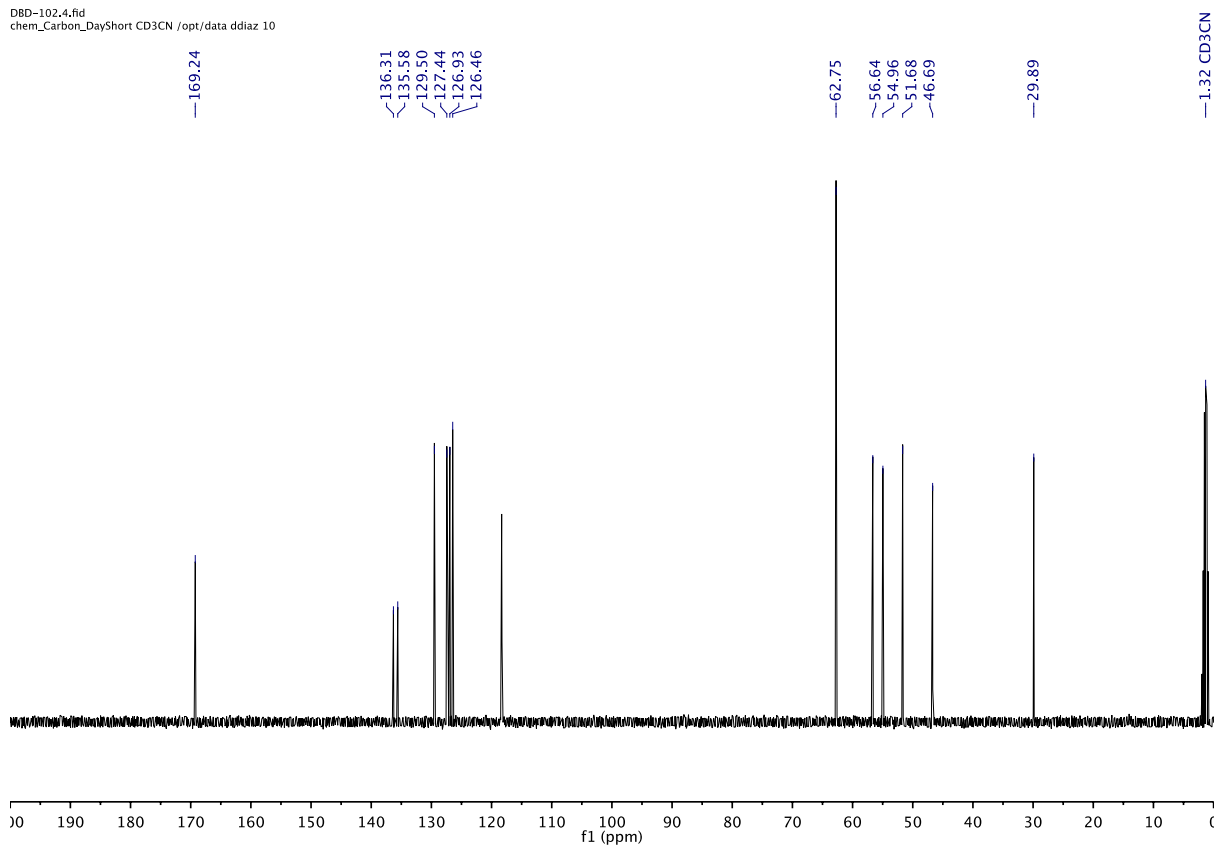

466

467

**Supplementary Figure 12:**  $^{13}\text{C}$  NMR of **3k** in acetonitrile- $d_6$  at 25 °C.

—13.11

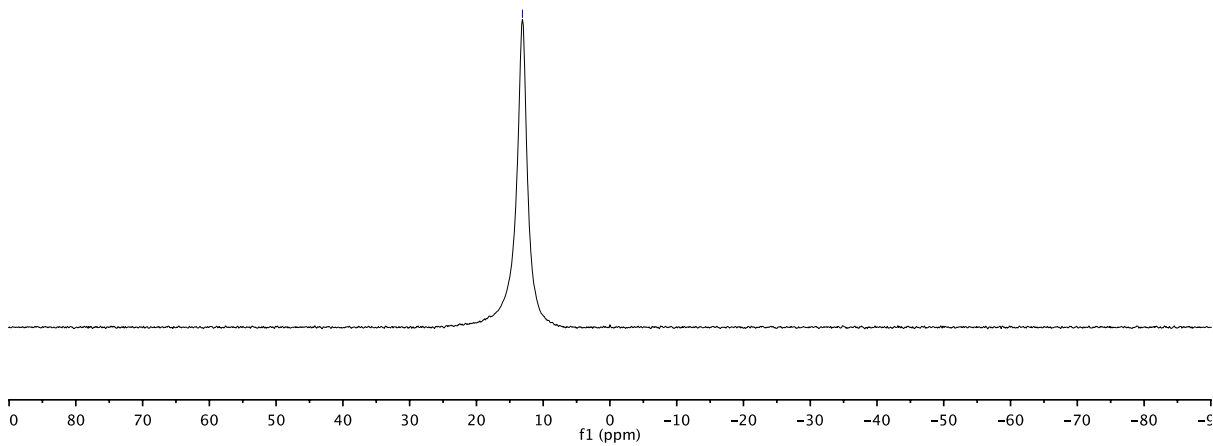

468

469

**Supplementary Figure 13:**  $^{11}\text{B}$  NMR of **3k** in acetonitrile- $d_3$  at 25 °C.

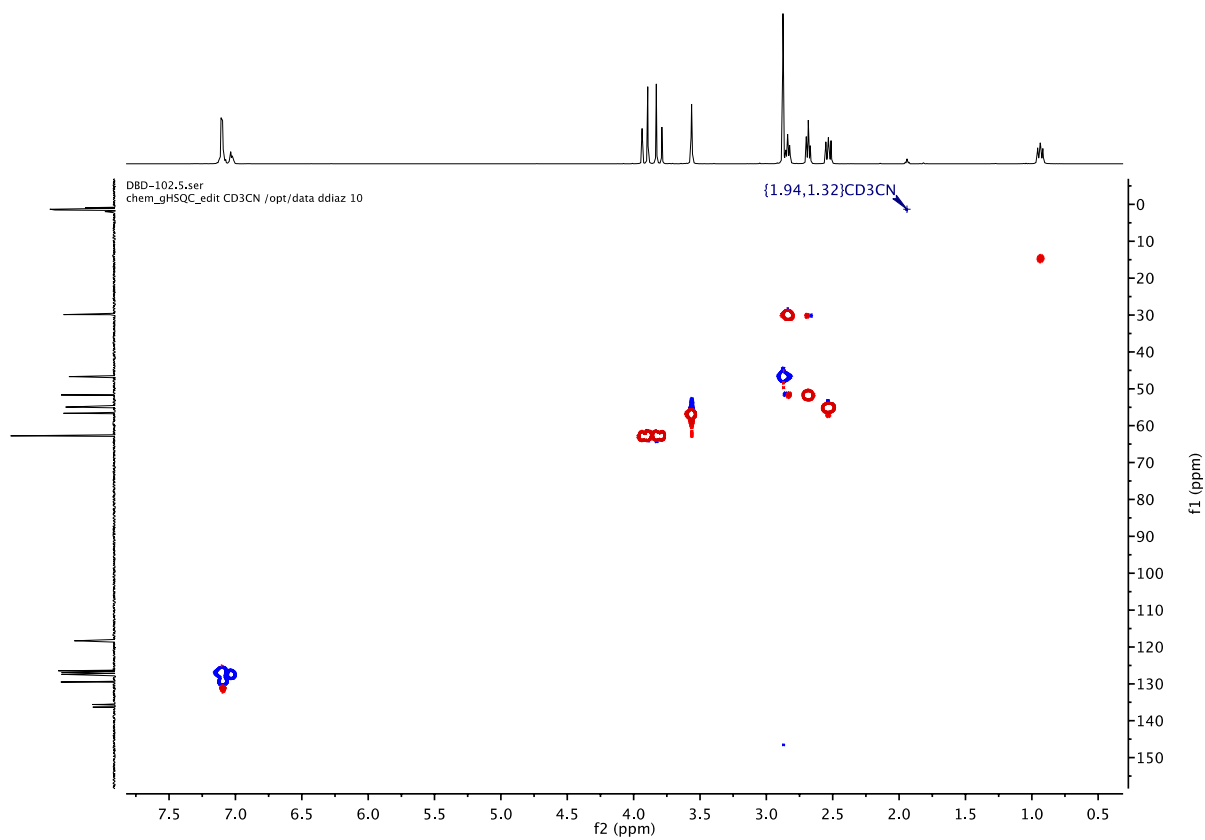

470

471

472

**Supplementary Figure 14:**  $^1\text{H}$ - $^{13}\text{C}$  HSQC NMR of **3k** in acetonitrile- $d_3$  at 25 °C.

473 Compound **4a**

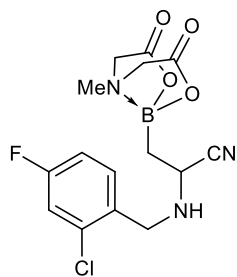

474

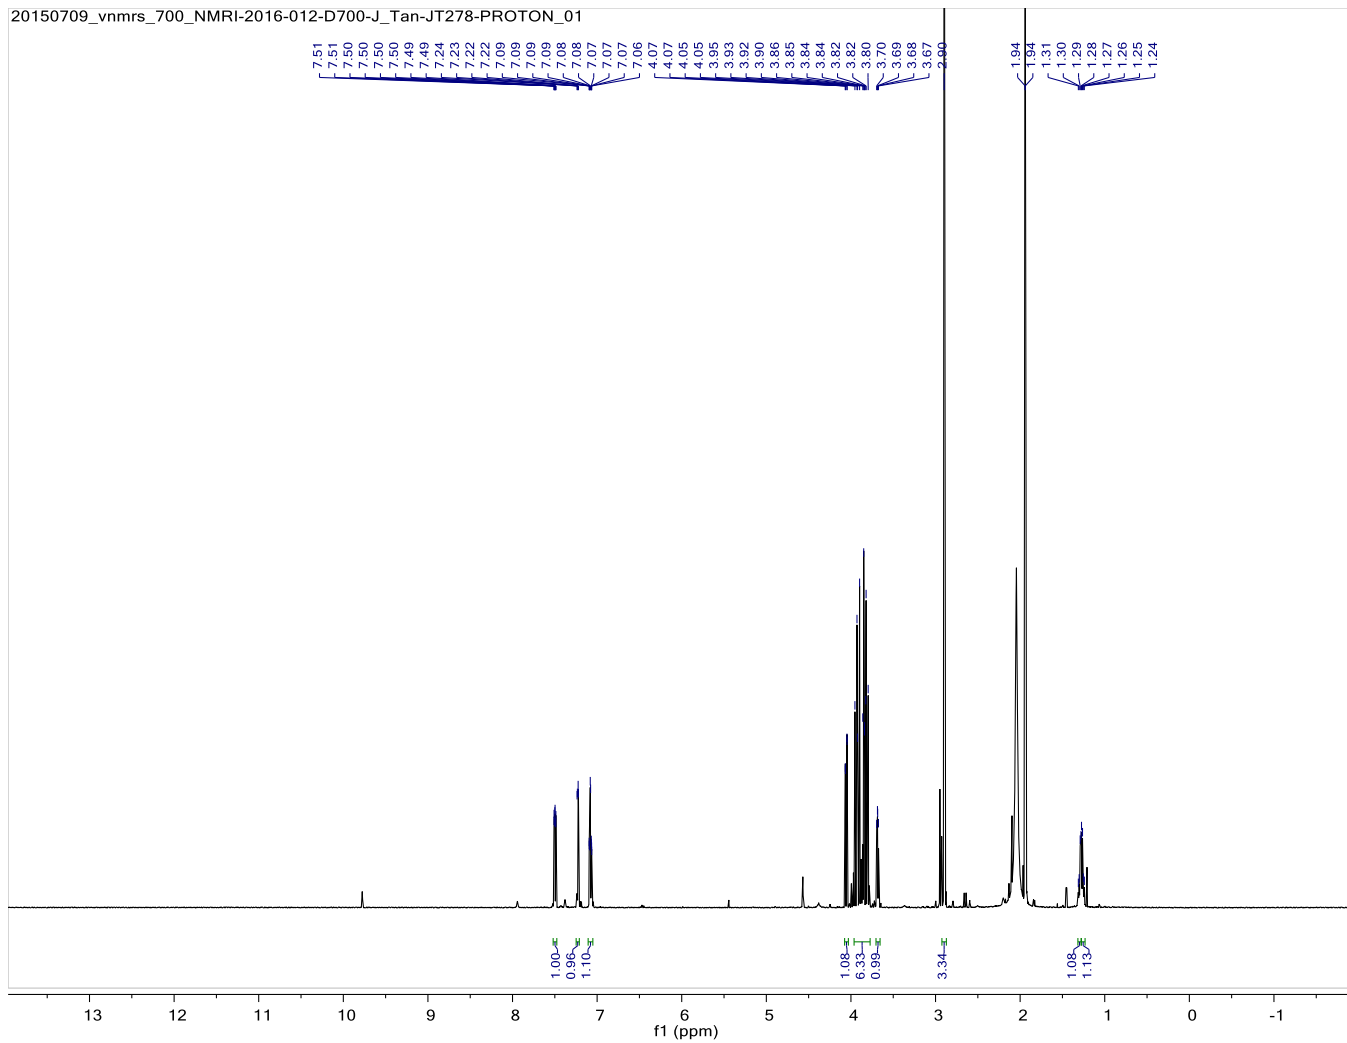

475

476

Supplementary Figure 15:  $^1\text{H}$  NMR of **4a** in acetonitrile- $d_3$  at 60 °C.

477

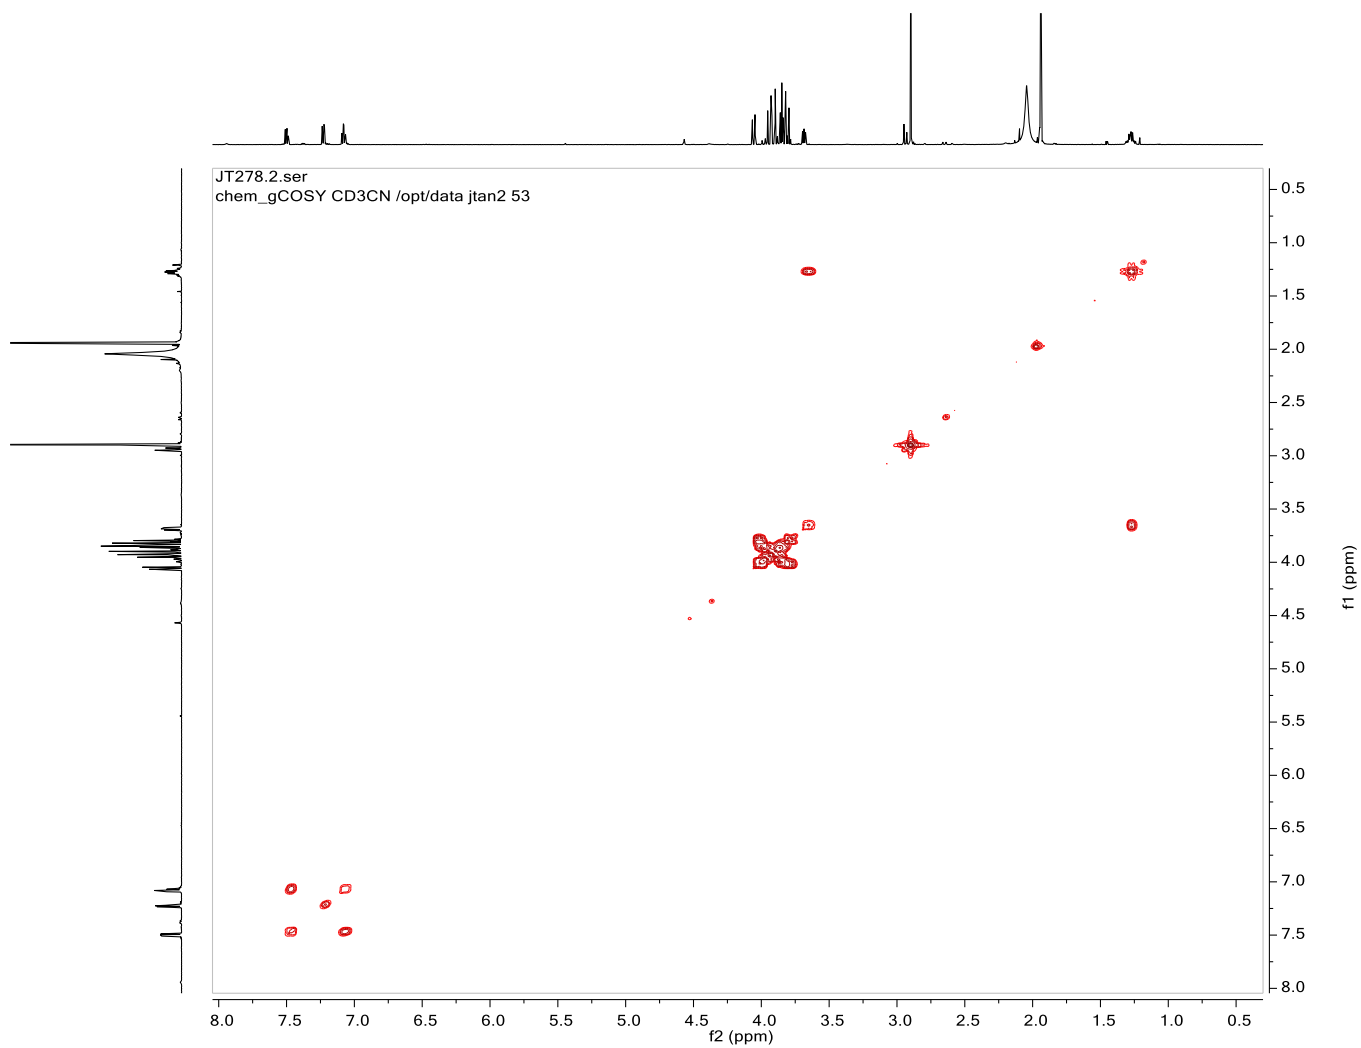

478

479

480

**Supplementary Figure 16:**  $^1\text{H}$ - $^1\text{H}$  COSY of **4a** in acetonitrile- $d_3$  at 25 °C.



20150604\_vnmrs\_500\_JT278-CARBON\_01  
JT278

169.70  
168.70  
163.36  
161.40

134.93  
134.84  
133.66  
133.63  
132.55  
132.53  
132.48  
122.40  
117.39  
117.19  
114.96  
114.79

62.90  
62.67

49.03  
47.33  
46.91

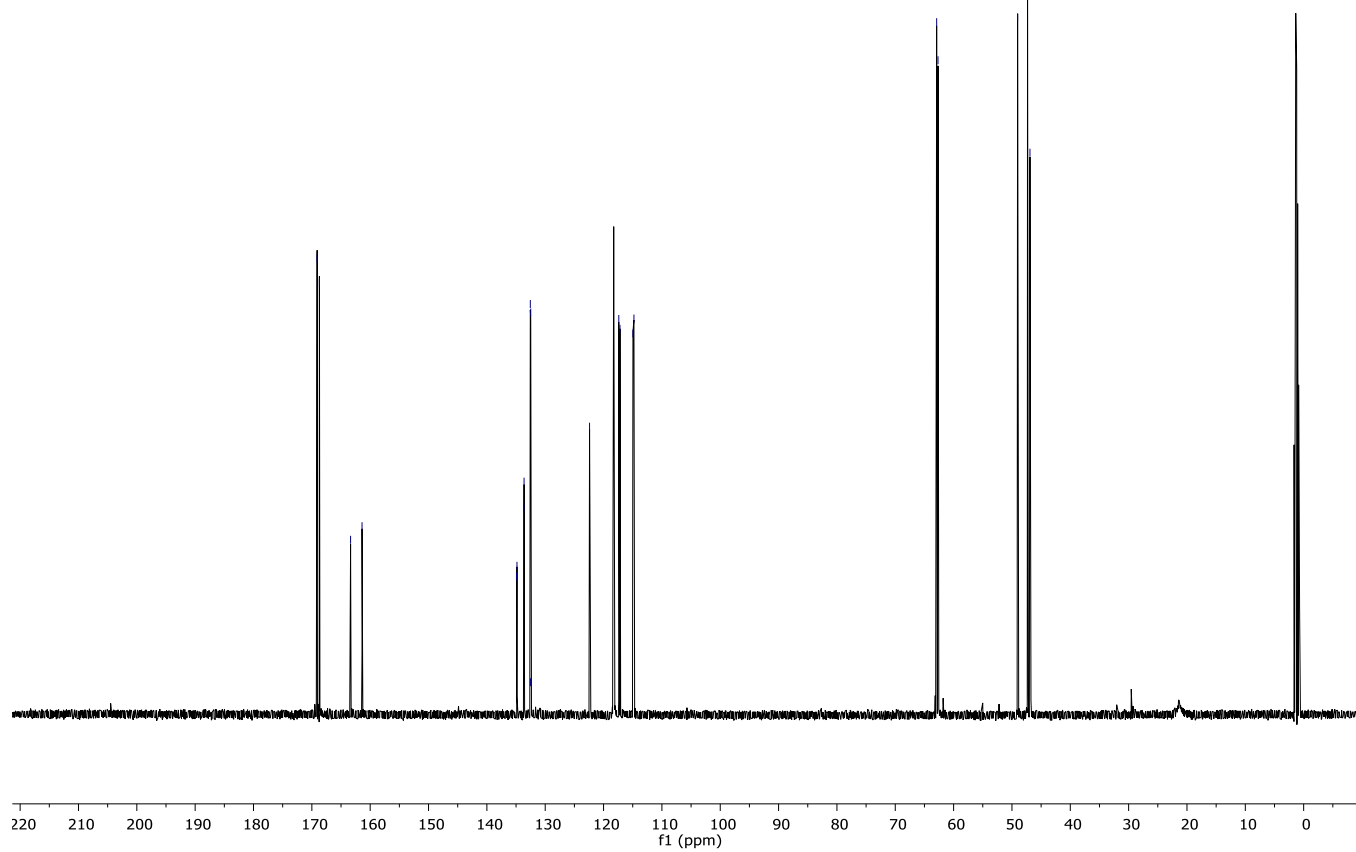

Supplementary Figure 17:  $^{13}\text{C}$  NMR of **4a** in acetonitrile- $d_3$  at 25 °C.

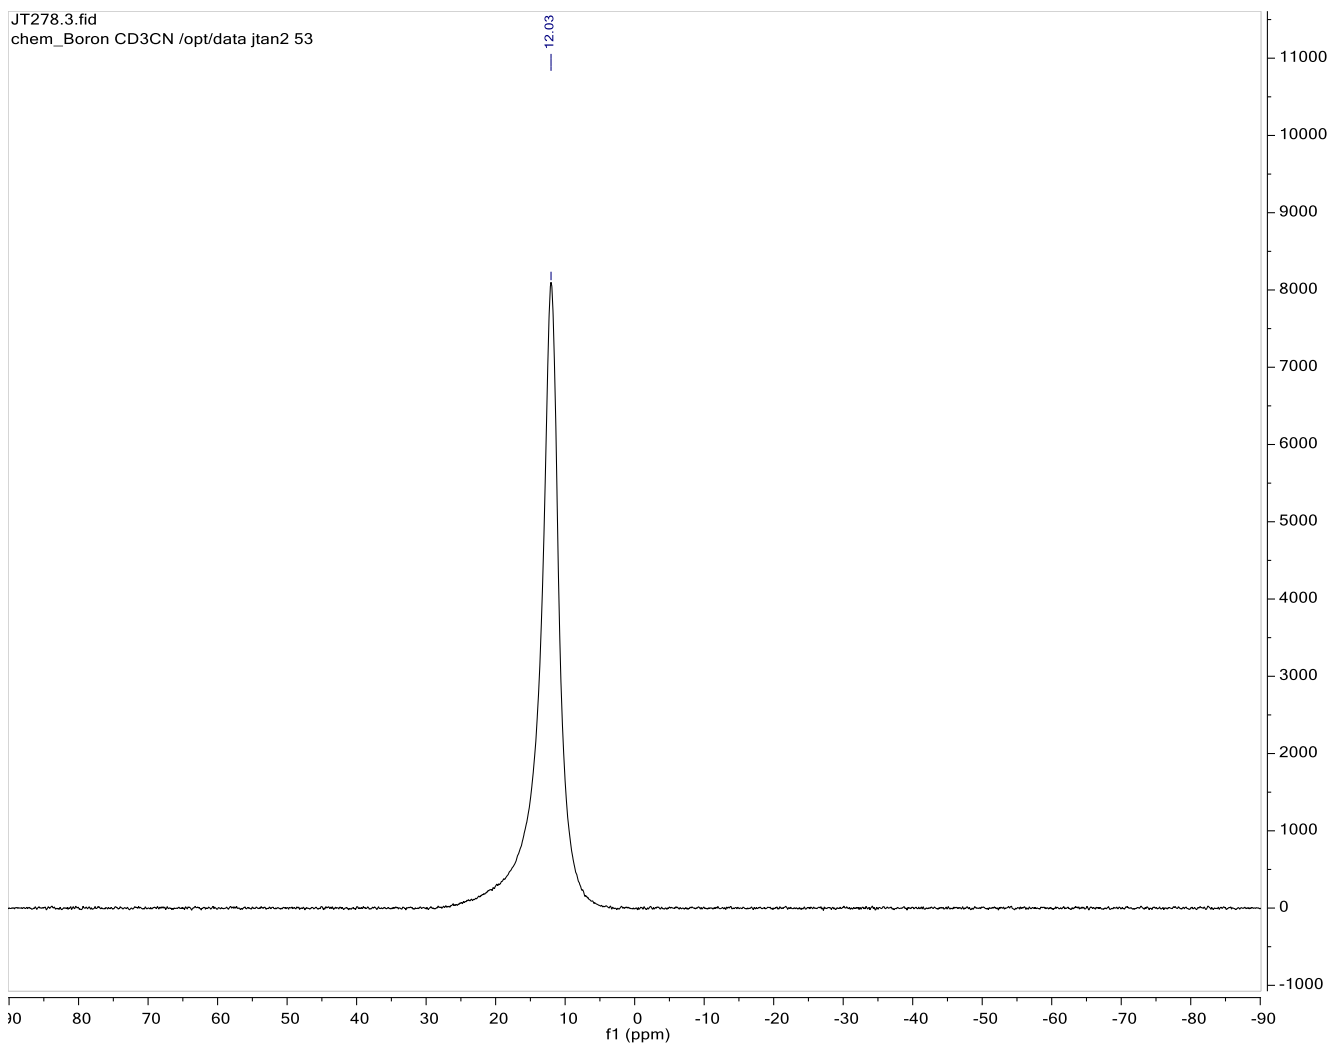

484

485

486

**Supplementary Figure 18:**  $^{11}\text{B}$  NMR of **4a** in acetonitrile- $d_3$  at 25 °C.

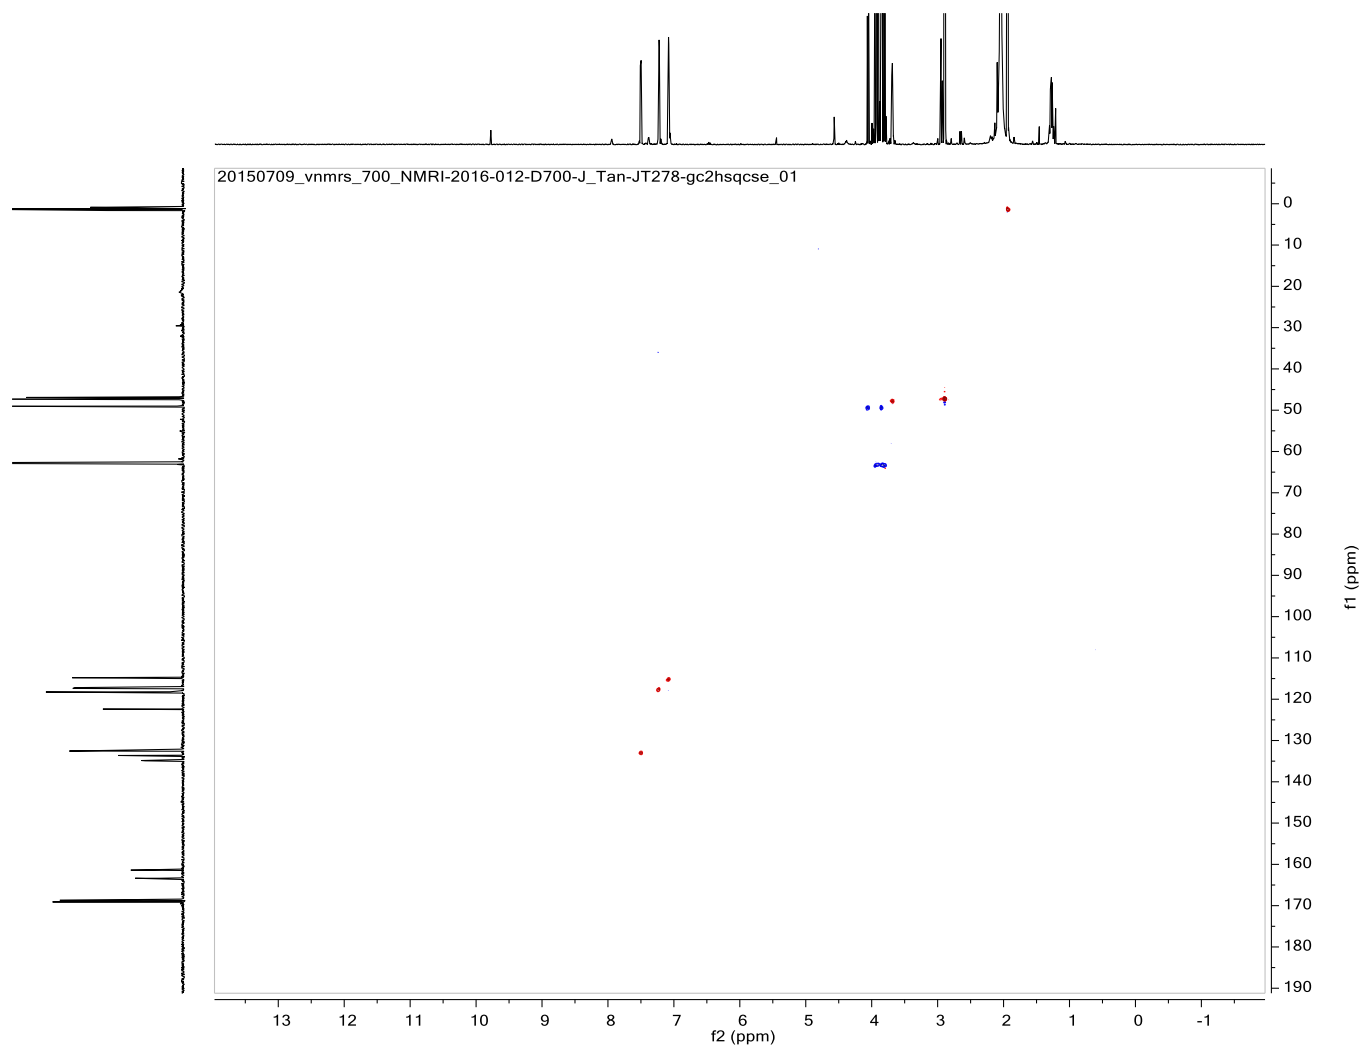

487

488

**Supplementary Figure 19:**  $^1\text{H}$ - $^{13}\text{C}$  HSQC NMR of **4a** in acetonitrile- $d_3$  at 60 °C.

489

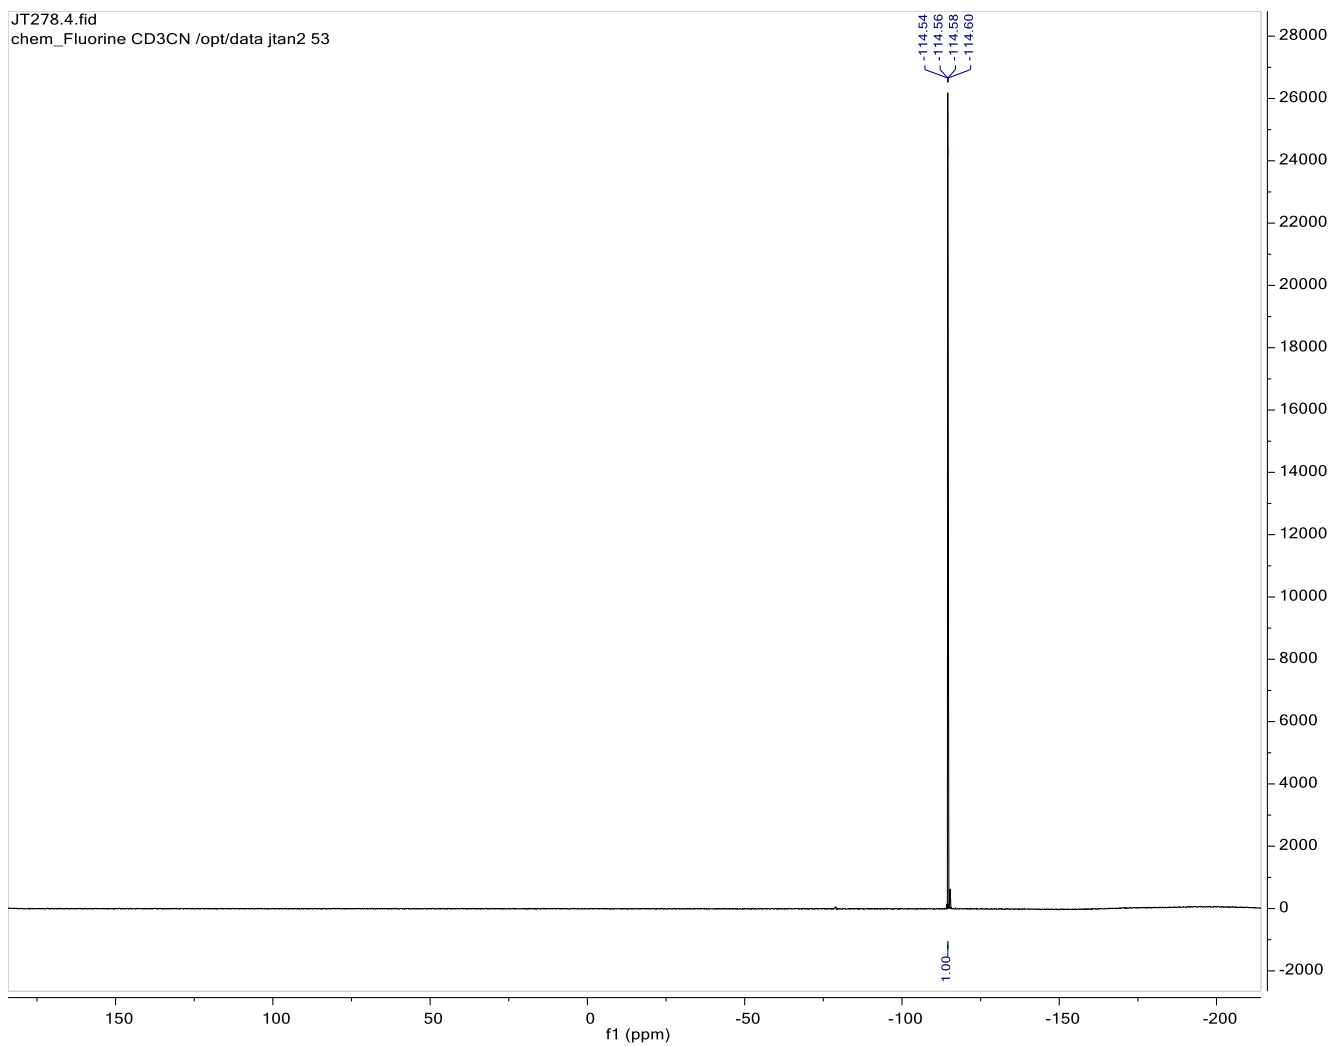

490

491

492

**Supplementary Figure 20:**  $^{19}\text{F}$  NMR of **4a** in acetonitrile- $d_3$  at 25 °C.

493 Compound **4b**

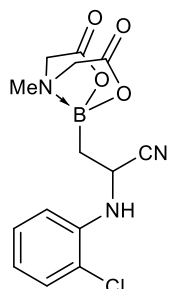

494

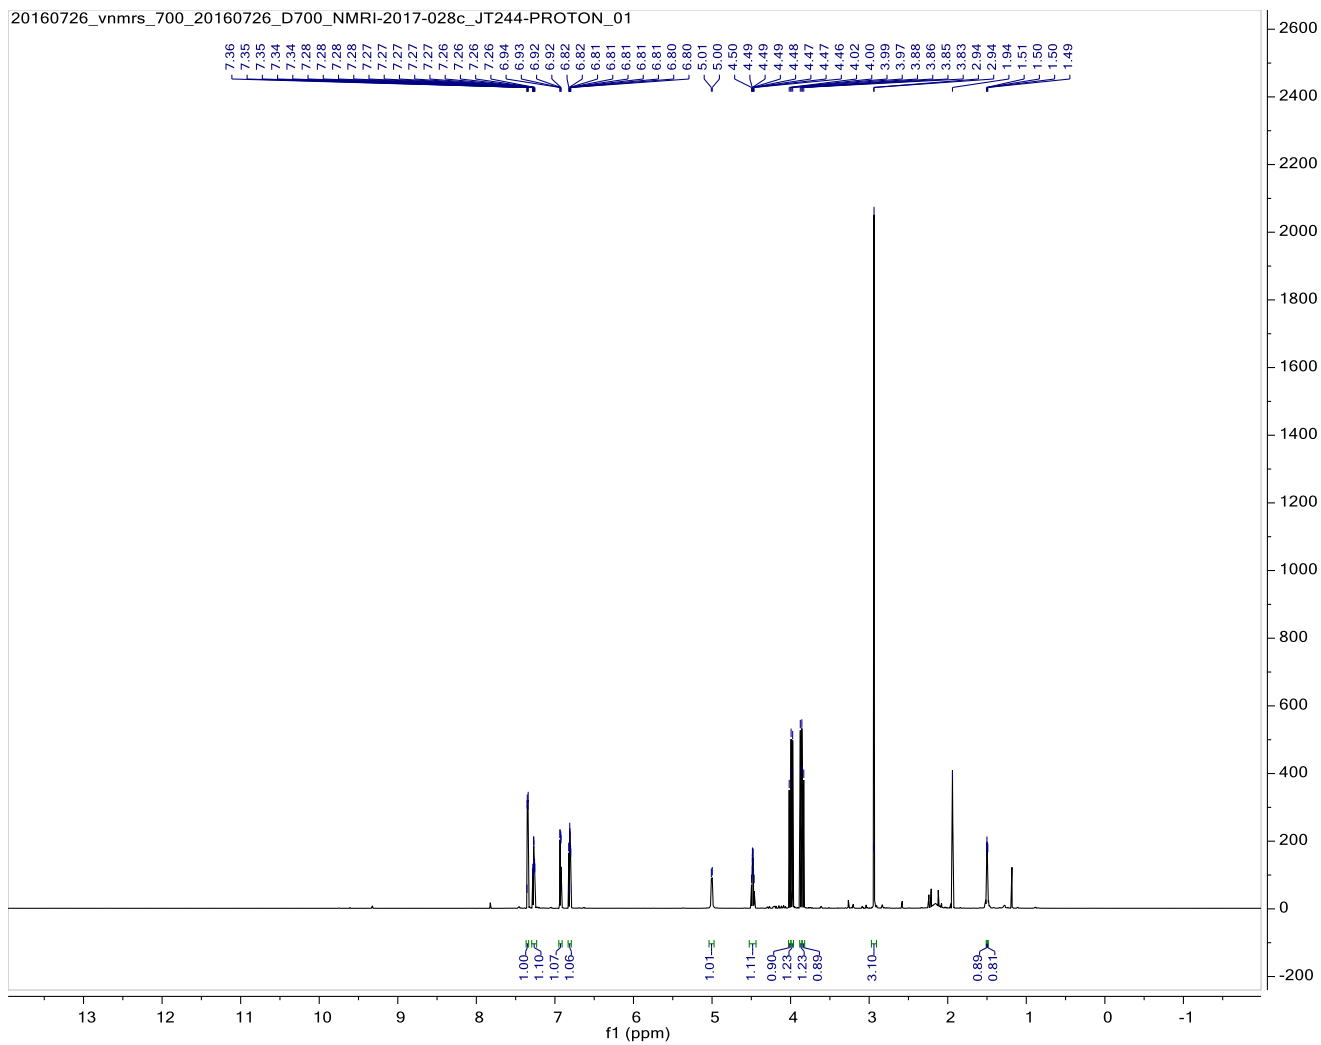

495

496

497

Supplementary Figure 21: <sup>1</sup>H NMR of **4b** in acetonitrile-*d*<sub>3</sub> at 25 °C.

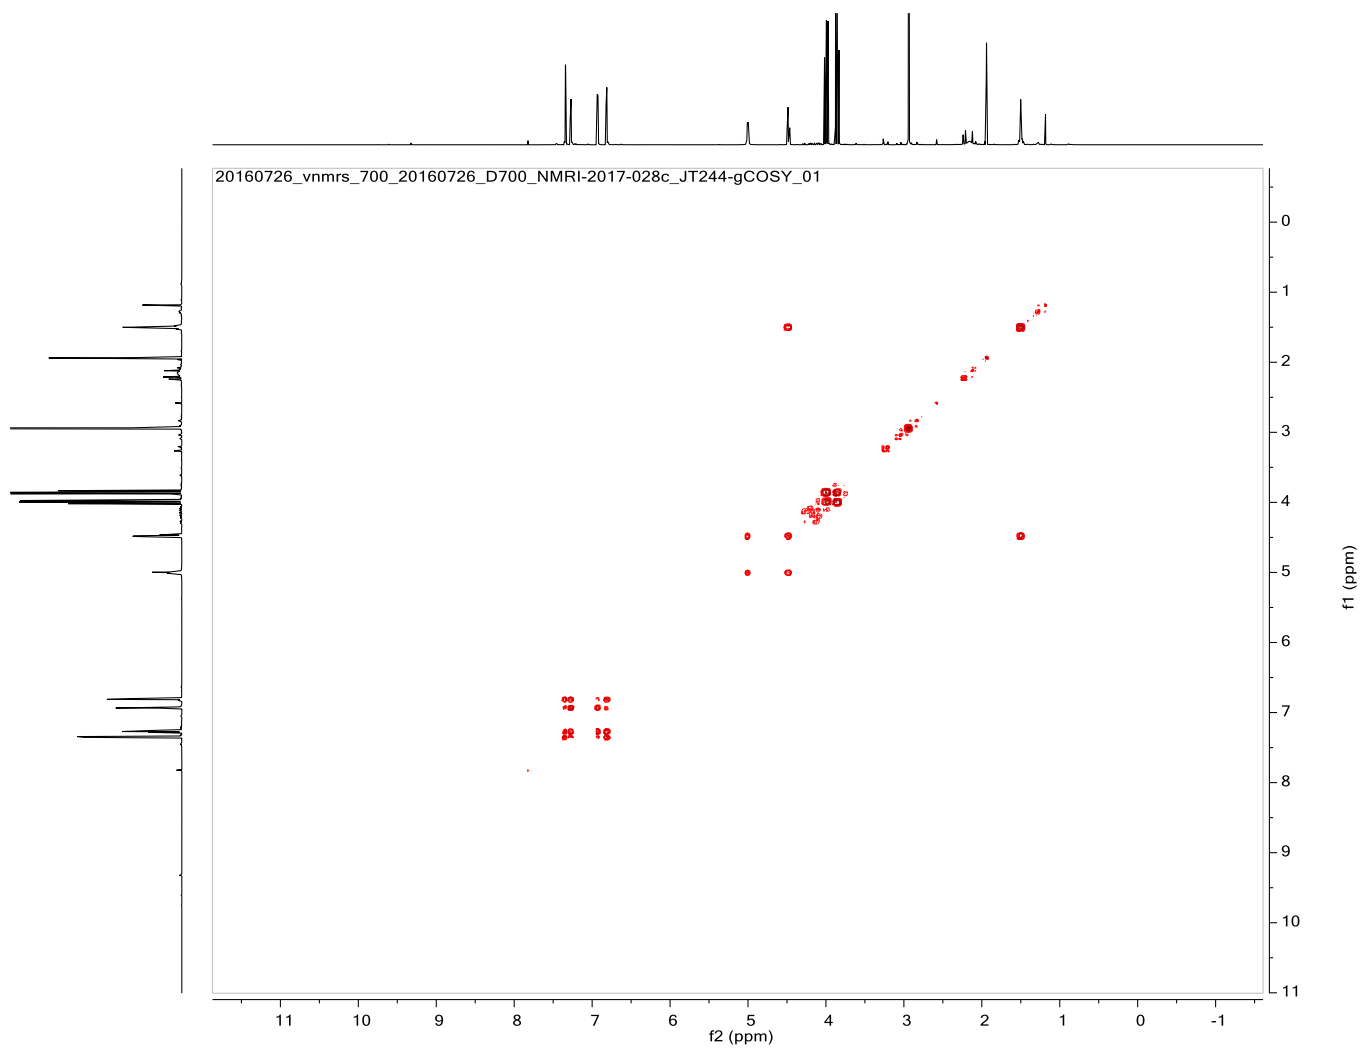

498

499

500

**Supplementary Figure 22:**  $^1\text{H}$ - $^1\text{H}$  COSY of **4b** in acetonitrile- $d_3$  at 25 °C.

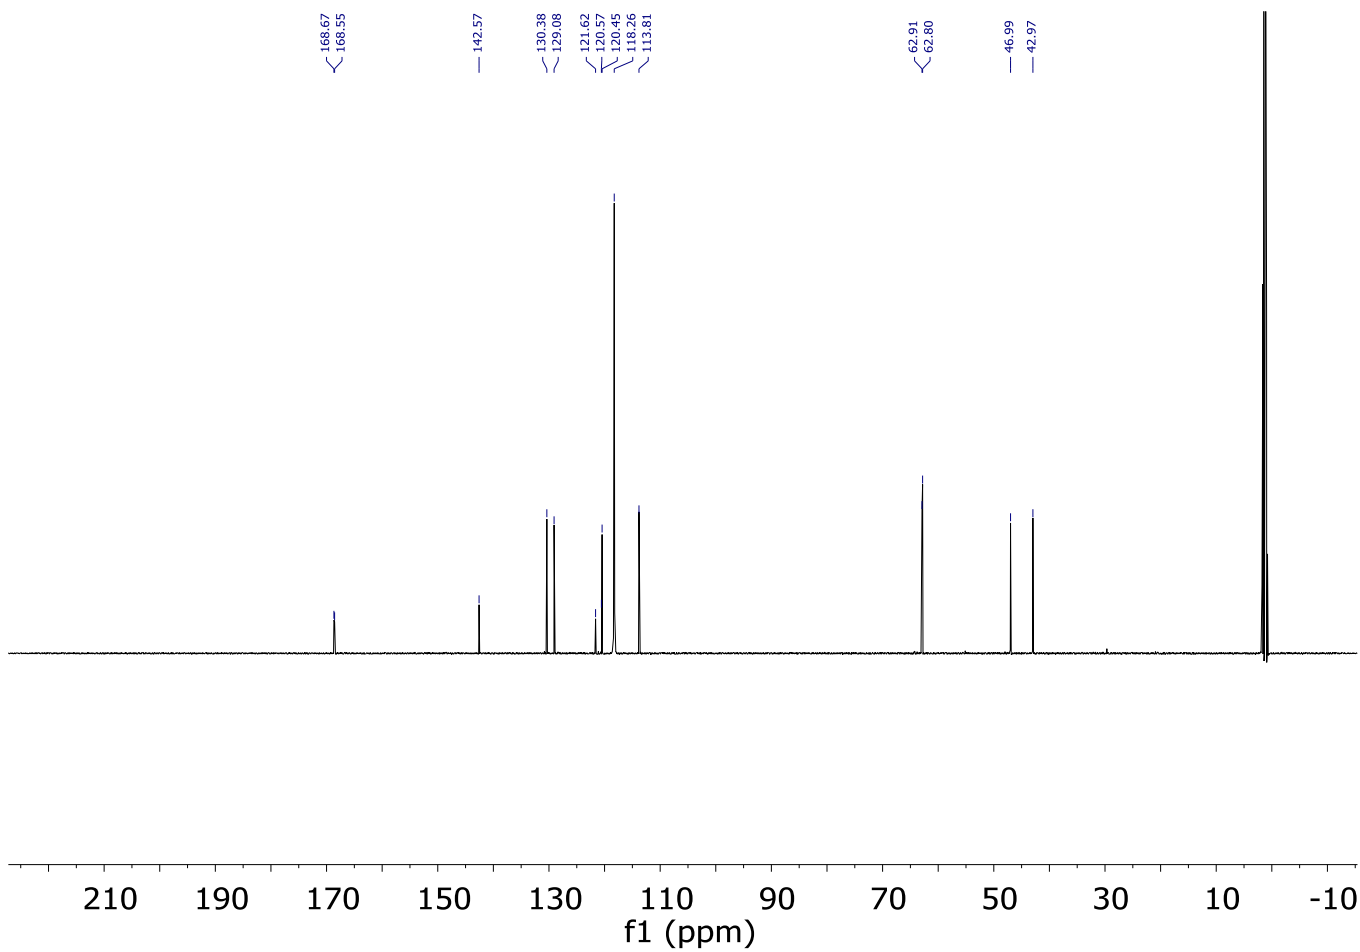

501  
502 **Supplementary Figure 23:**  $^{13}\text{C}$  NMR of **4b** in acetonitrile- $d_3$  at 25 °C.  
503

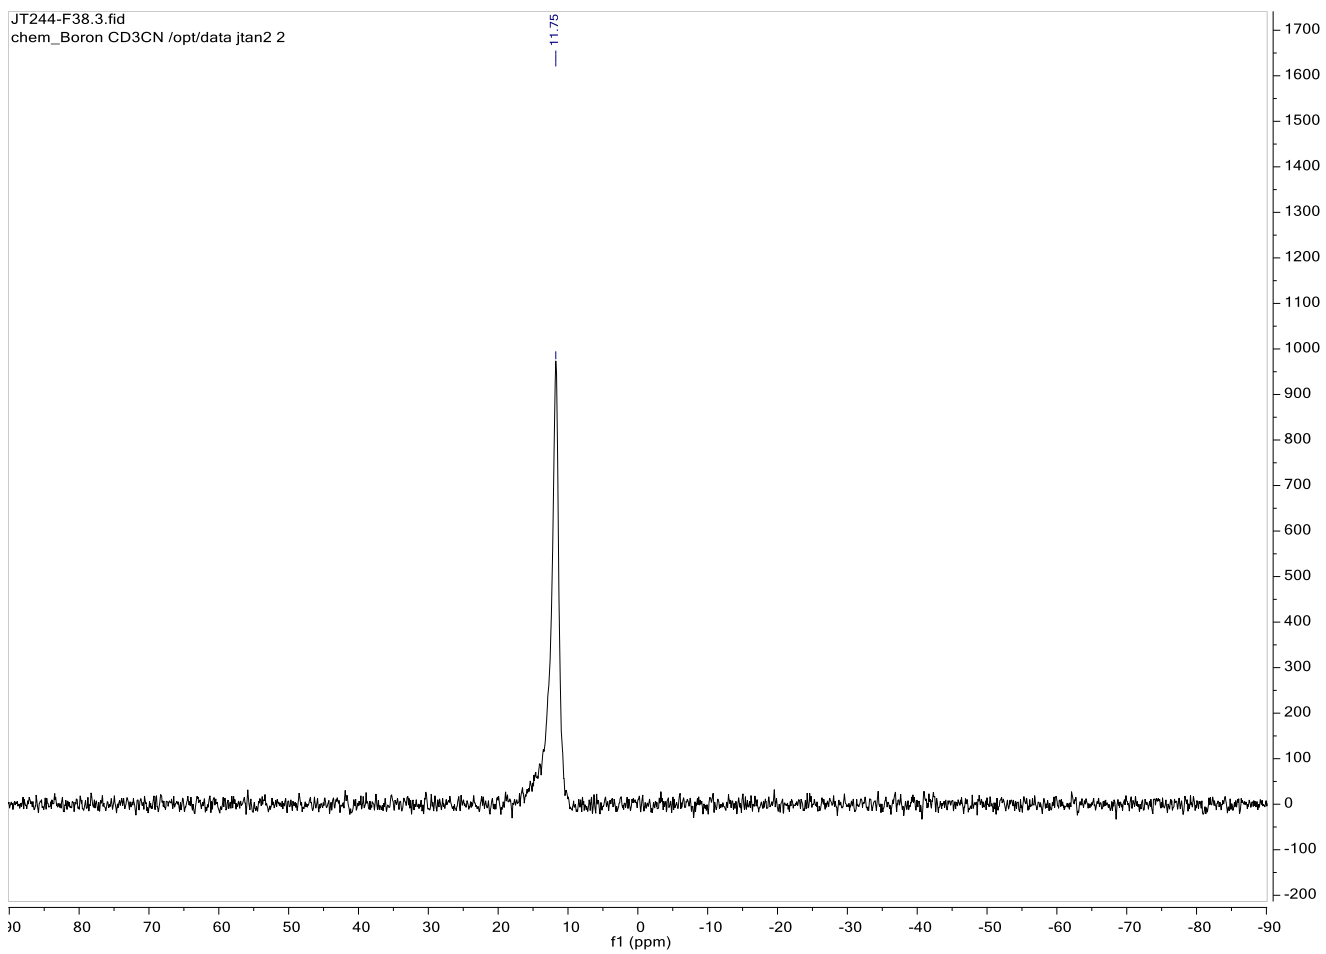

504

505

506

**Supplementary Figure 24:**  $^{11}\text{B}$  NMR of **4b** in acetonitrile- $d_3$  at 25 °C.



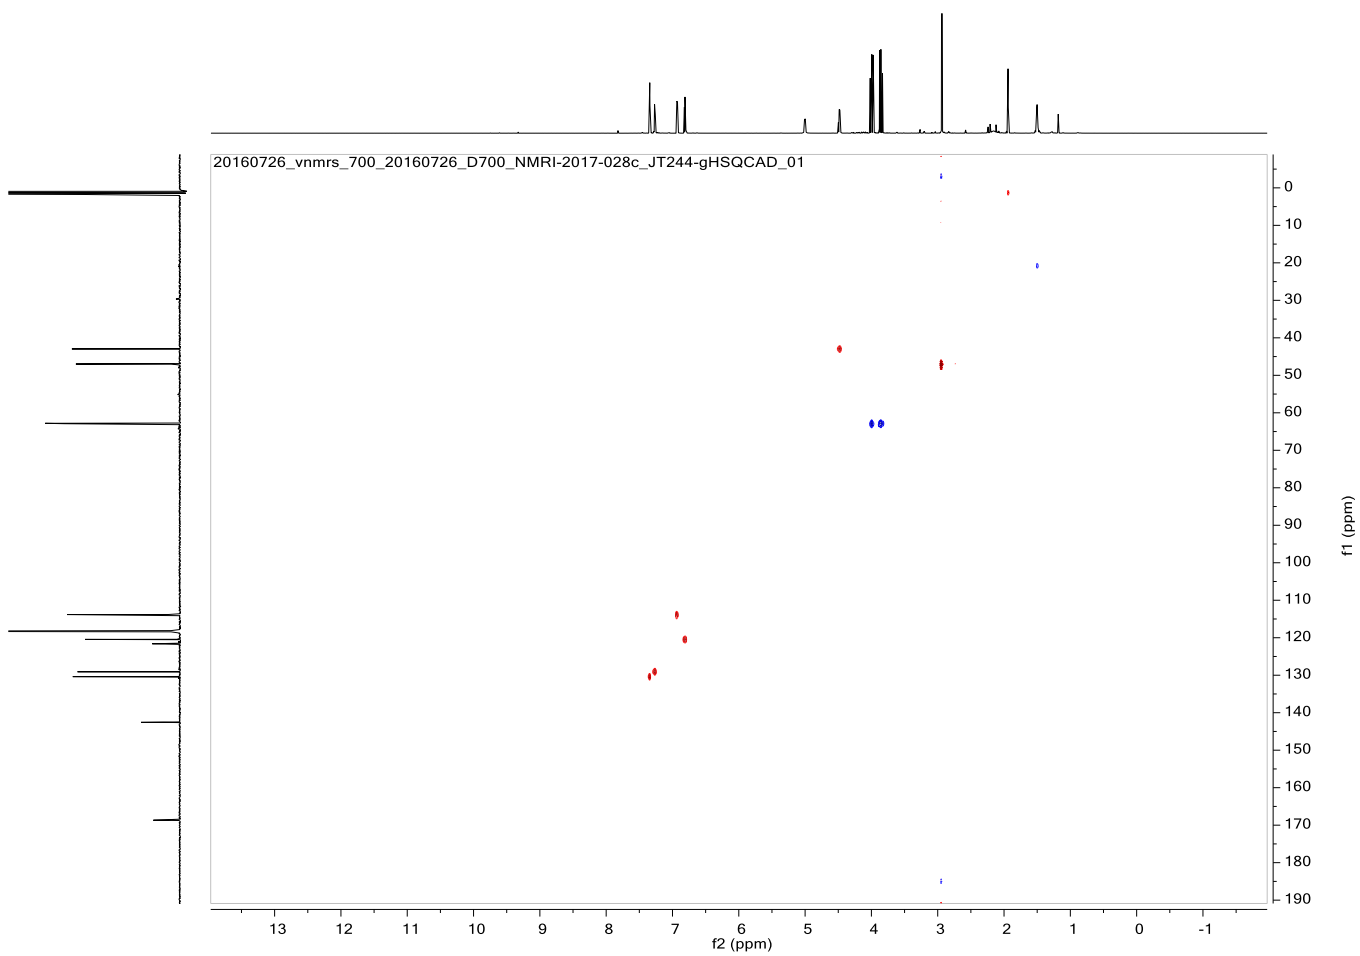

507

508

509

**Supplementary Figure 25:**  $^1\text{H}$ - $^{13}\text{C}$  HSQC NMR of **4b** in acetonitrile- $d_3$  at 60 °C.

510 Compound **4c**

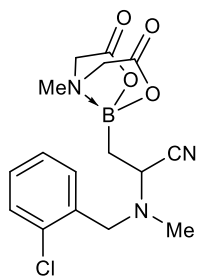

511

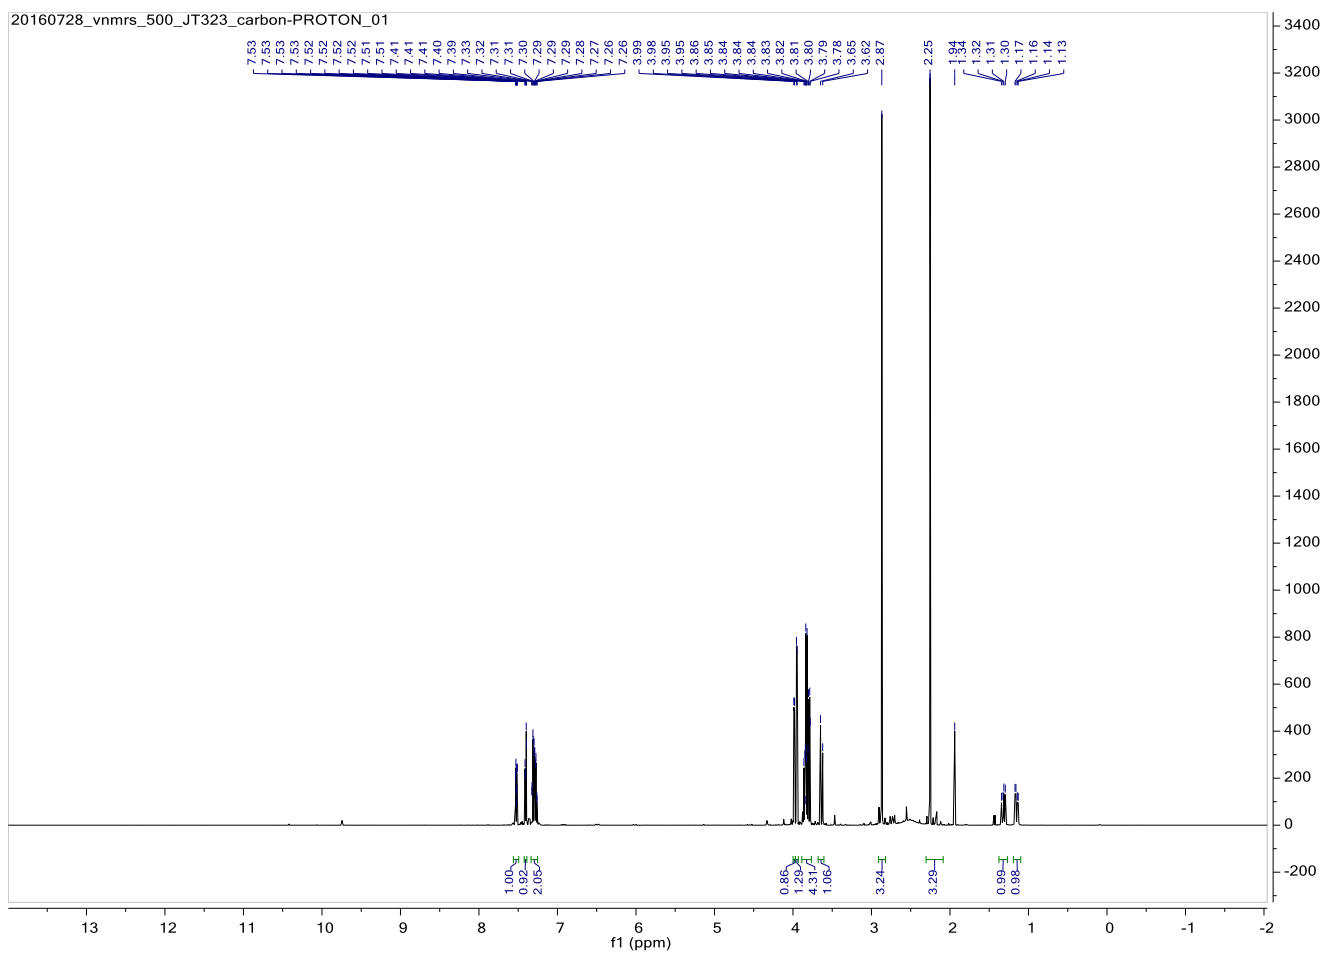

512

513

514

Supplementary Figure 26:  $^1\text{H}$  NMR of **4c** in acetonitrile- $d_3$  at 25 °C.

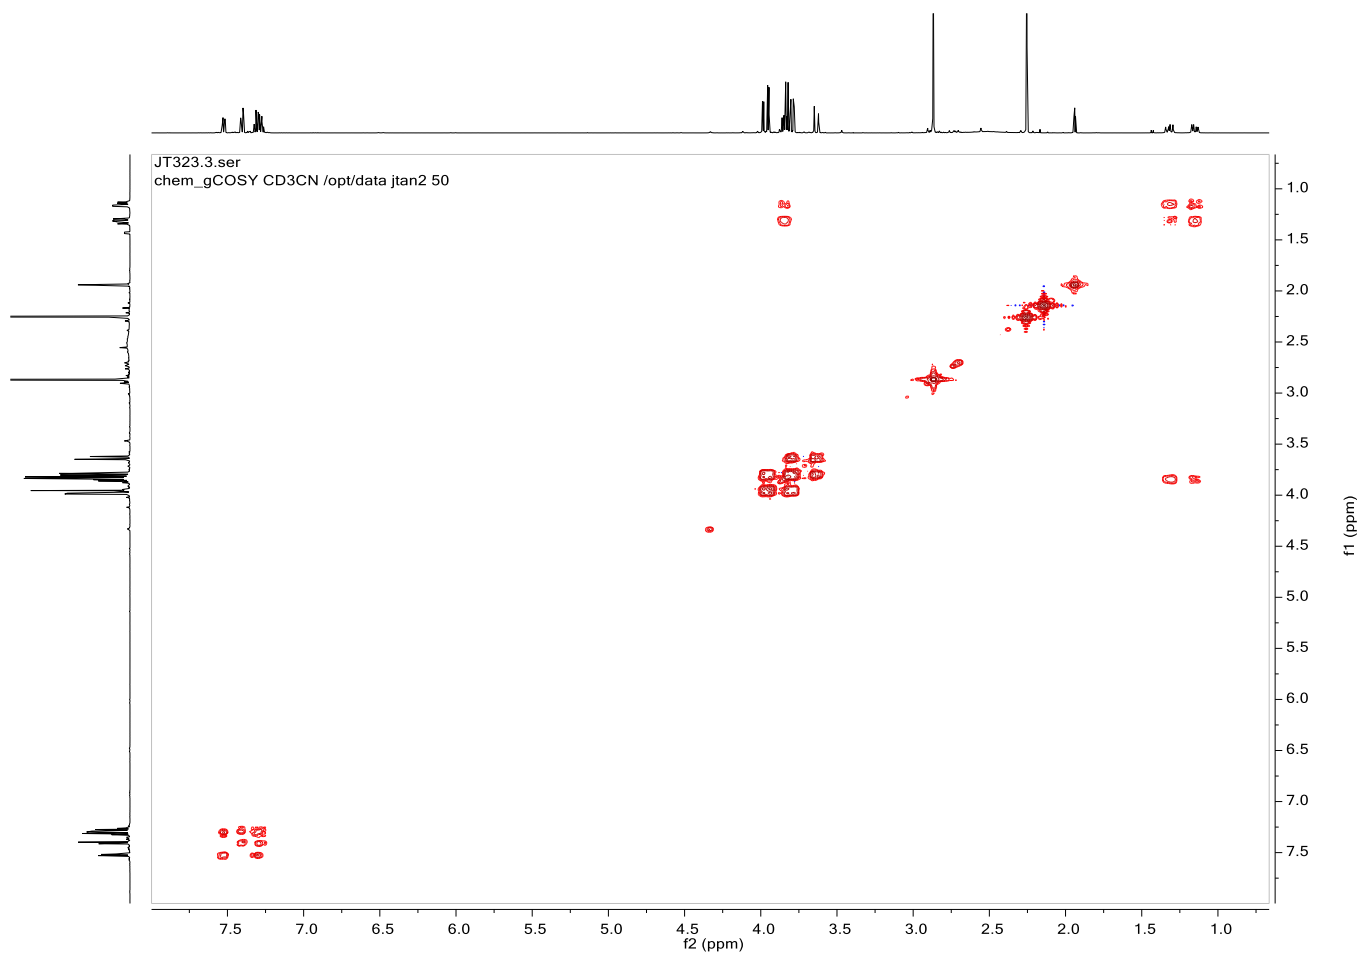

515

516

517

**Supplementary Figure 27:**  $^1\text{H}$ - $^1\text{H}$  COSY of **4c** in acetonitrile- $d_3$  at 25 °C.

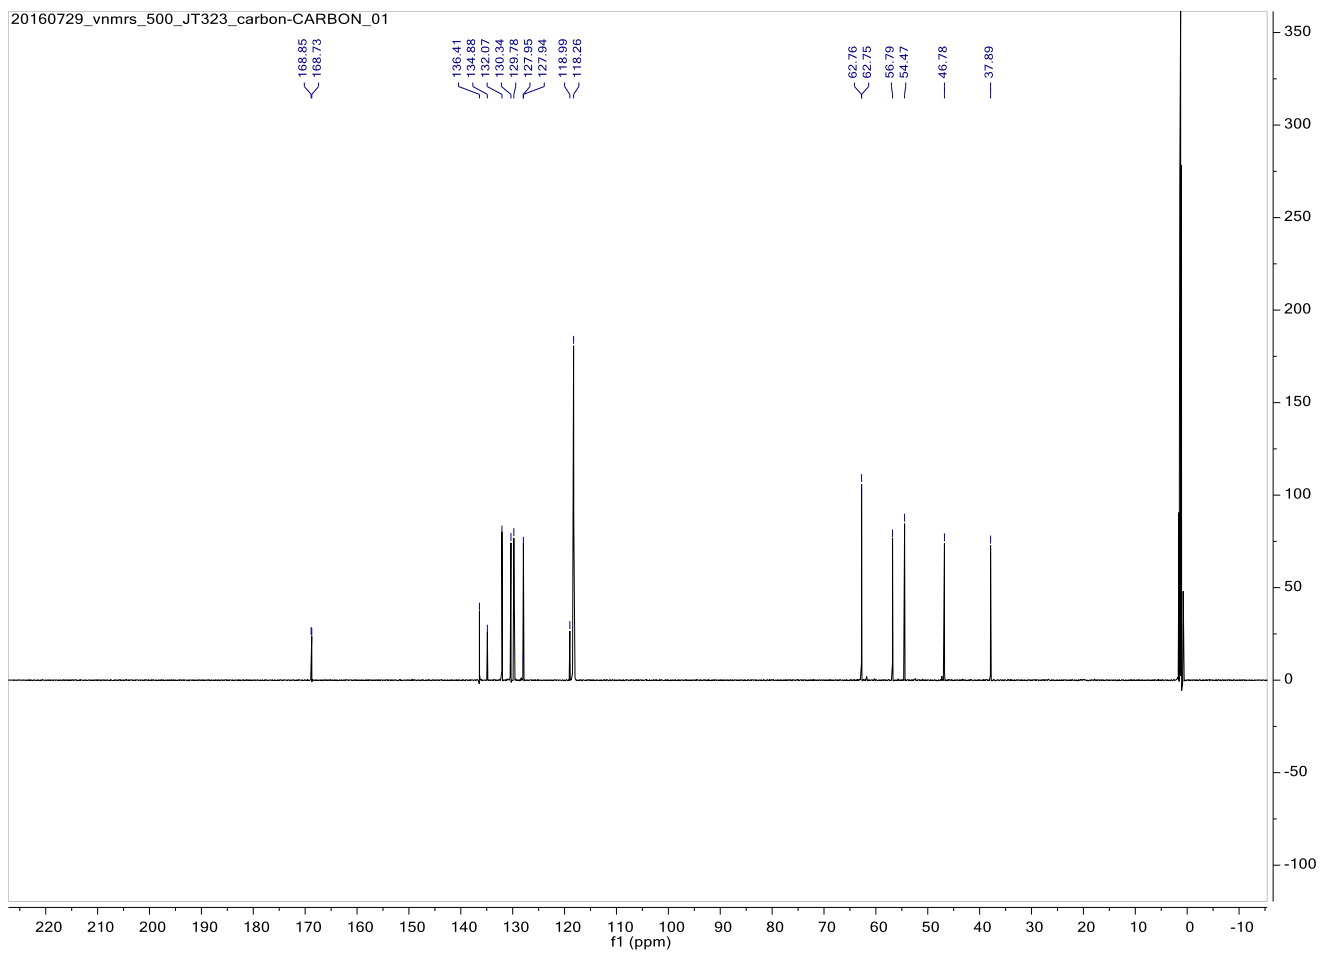

518

519

520

**Supplementary Figure 28:**  $^{13}\text{C}$  NMR of **4c** in acetonitrile- $d_3$  at 25 °C.

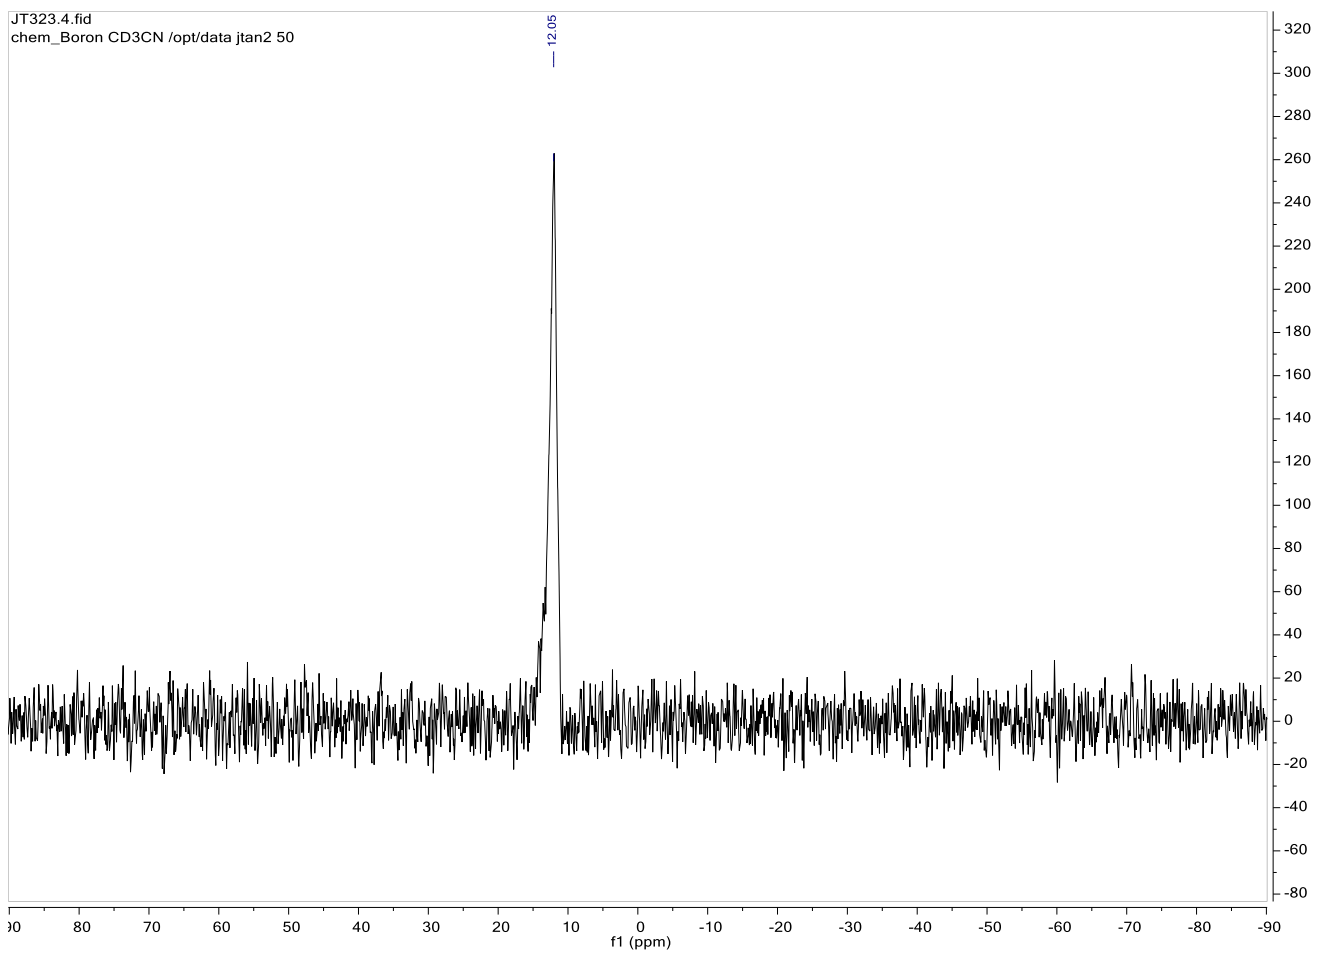

521

522

523

**Supplementary Figure 29:**  $^{11}\text{B}$  NMR of **4c** in acetonitrile- $d_3$  at 25 °C.

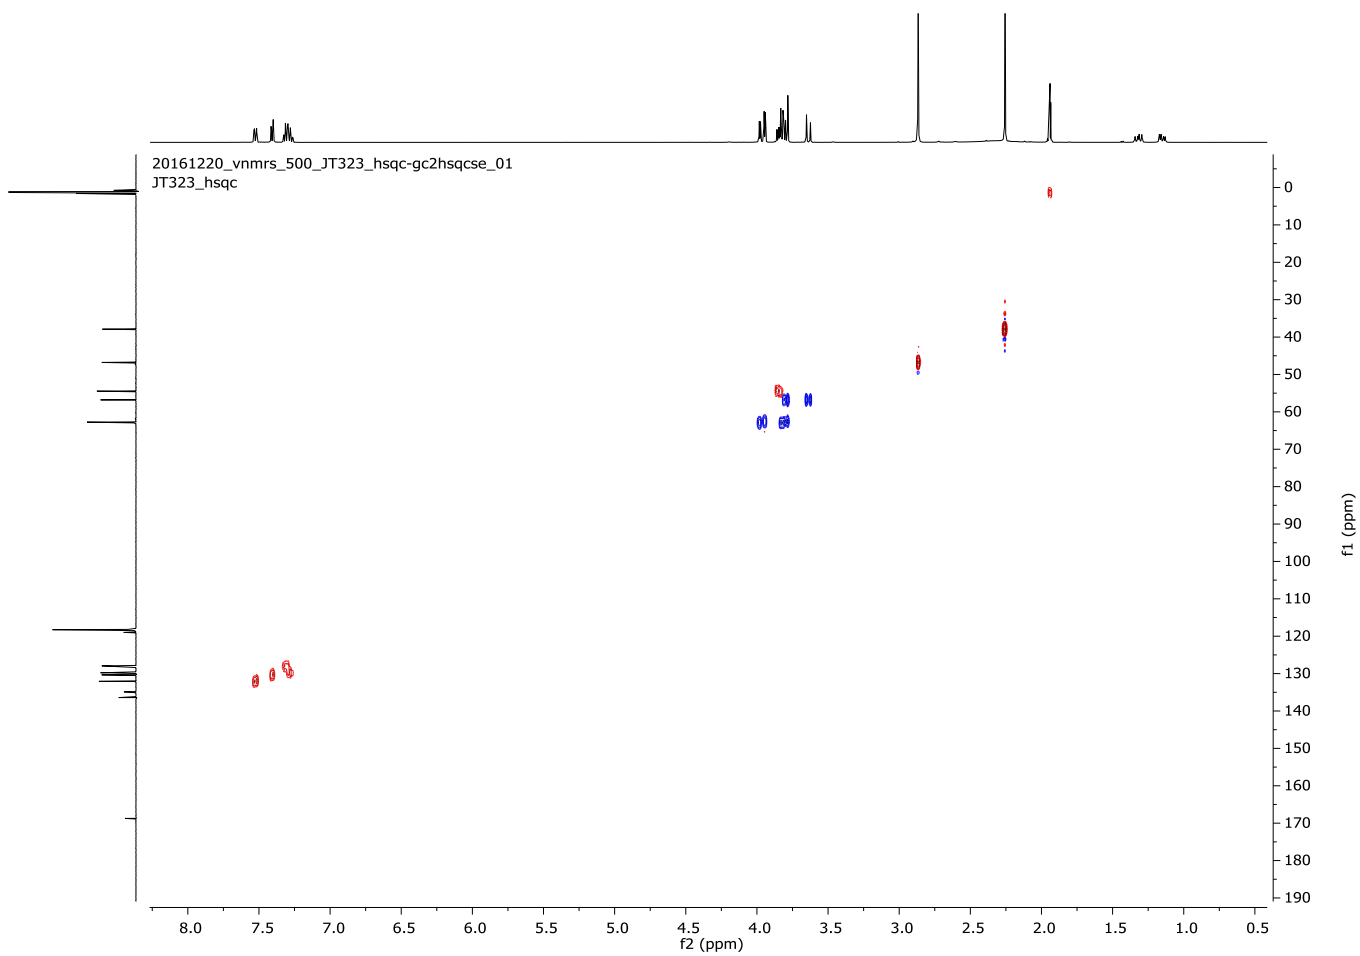

524

525

**Supplementary Figure 30:**  $^1\text{H}$ - $^{13}\text{C}$  HSQC NMR of **4c** in acetonitrile- $d_3$  at 25 °C.

526

527 Compound **4d**

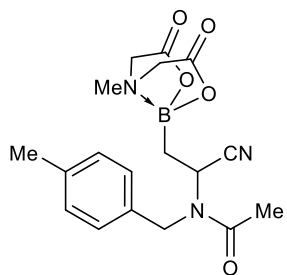

528

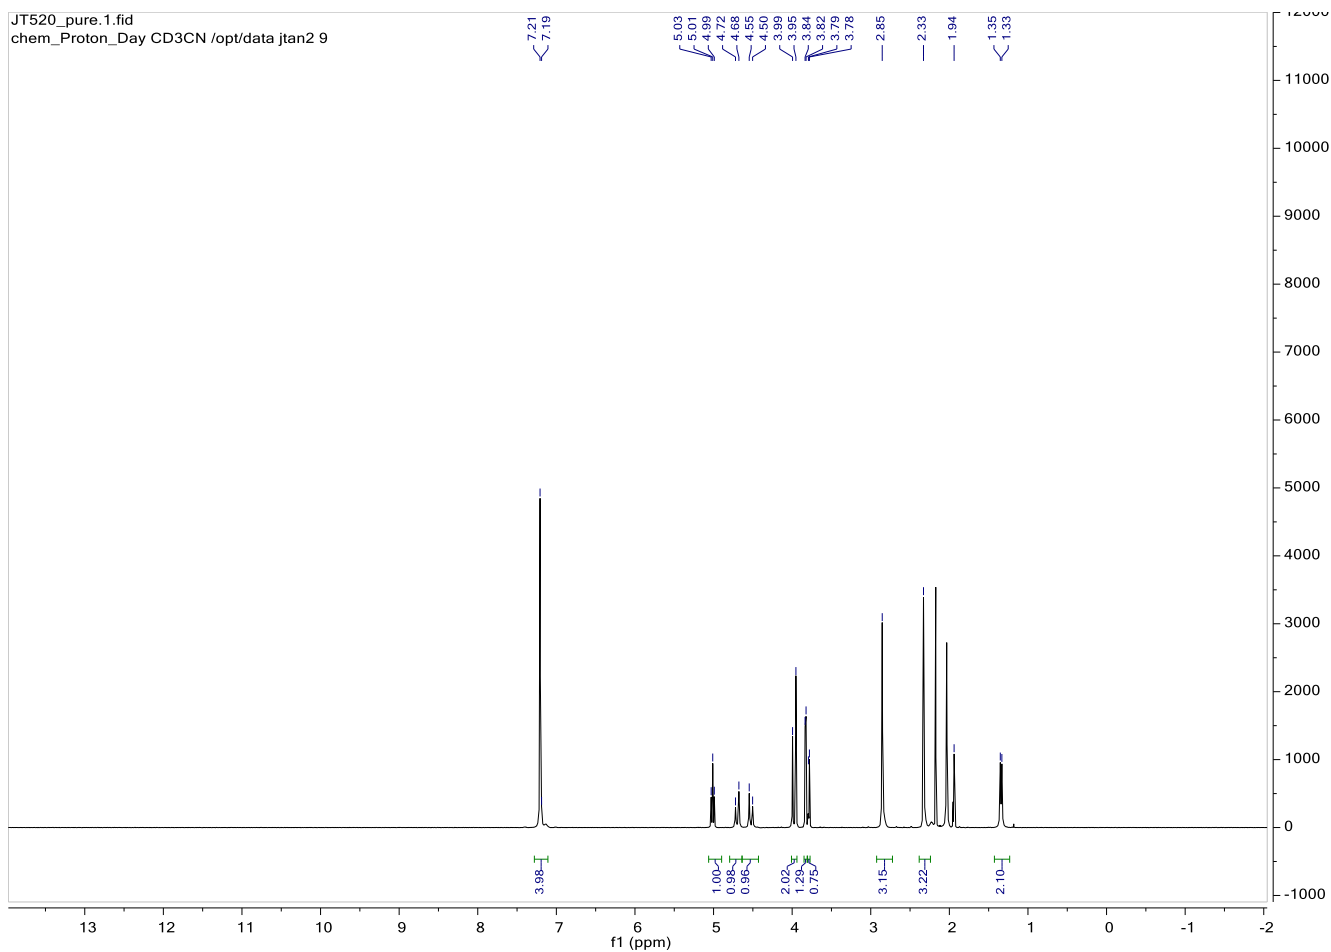

529

530

**Supplementary Figure 31:**  $^1\text{H}$  NMR of **4d** in acetonitrile- $d_3$  at 25 °C.

531

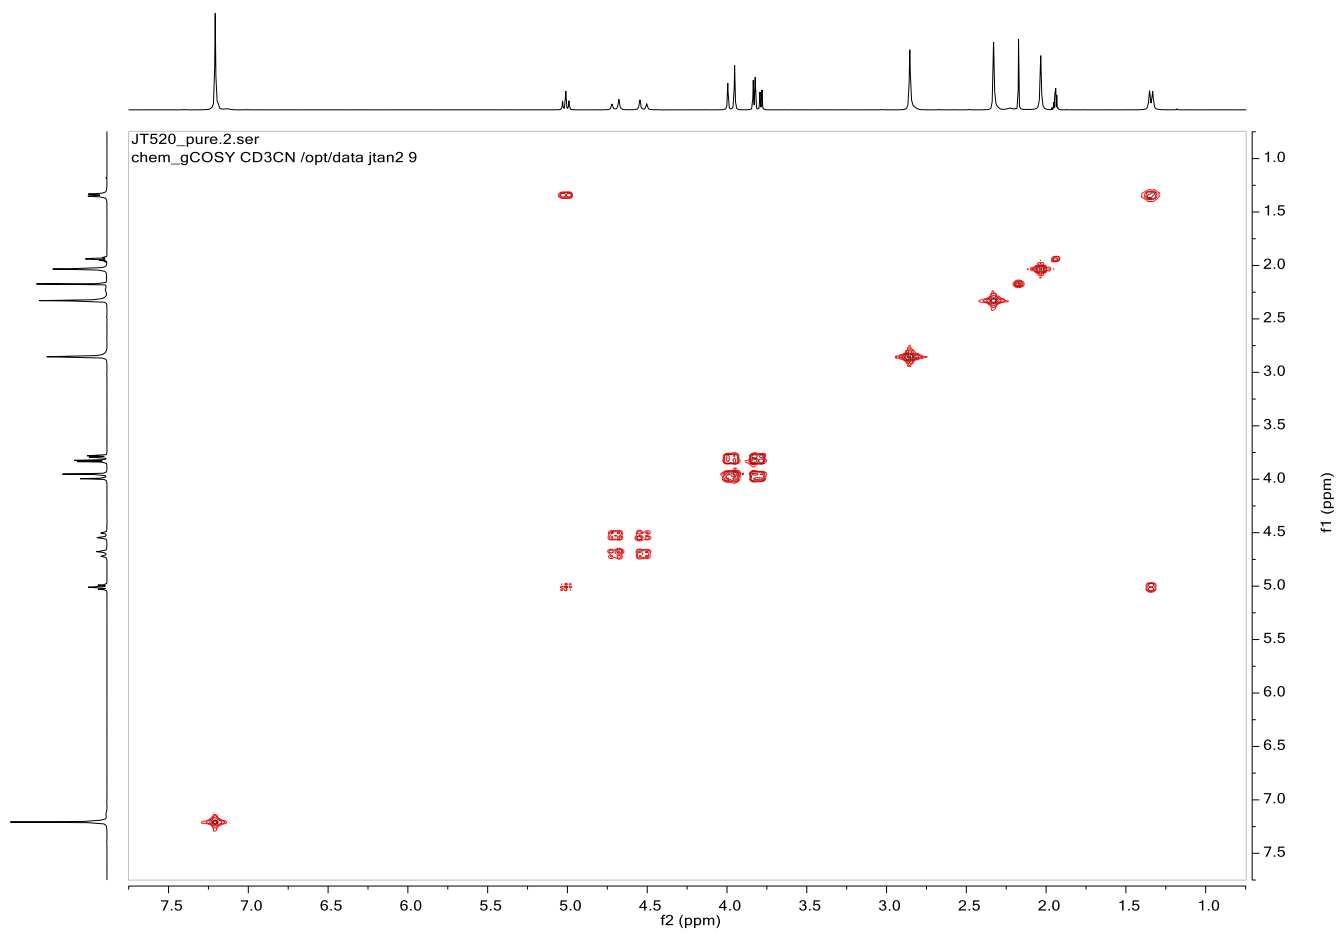

532

533

534

**Supplementary Figure 32:**  $^1\text{H}$ - $^1\text{H}$  COSY of **4d** in acetonitrile- $d_3$  at 25 °C.



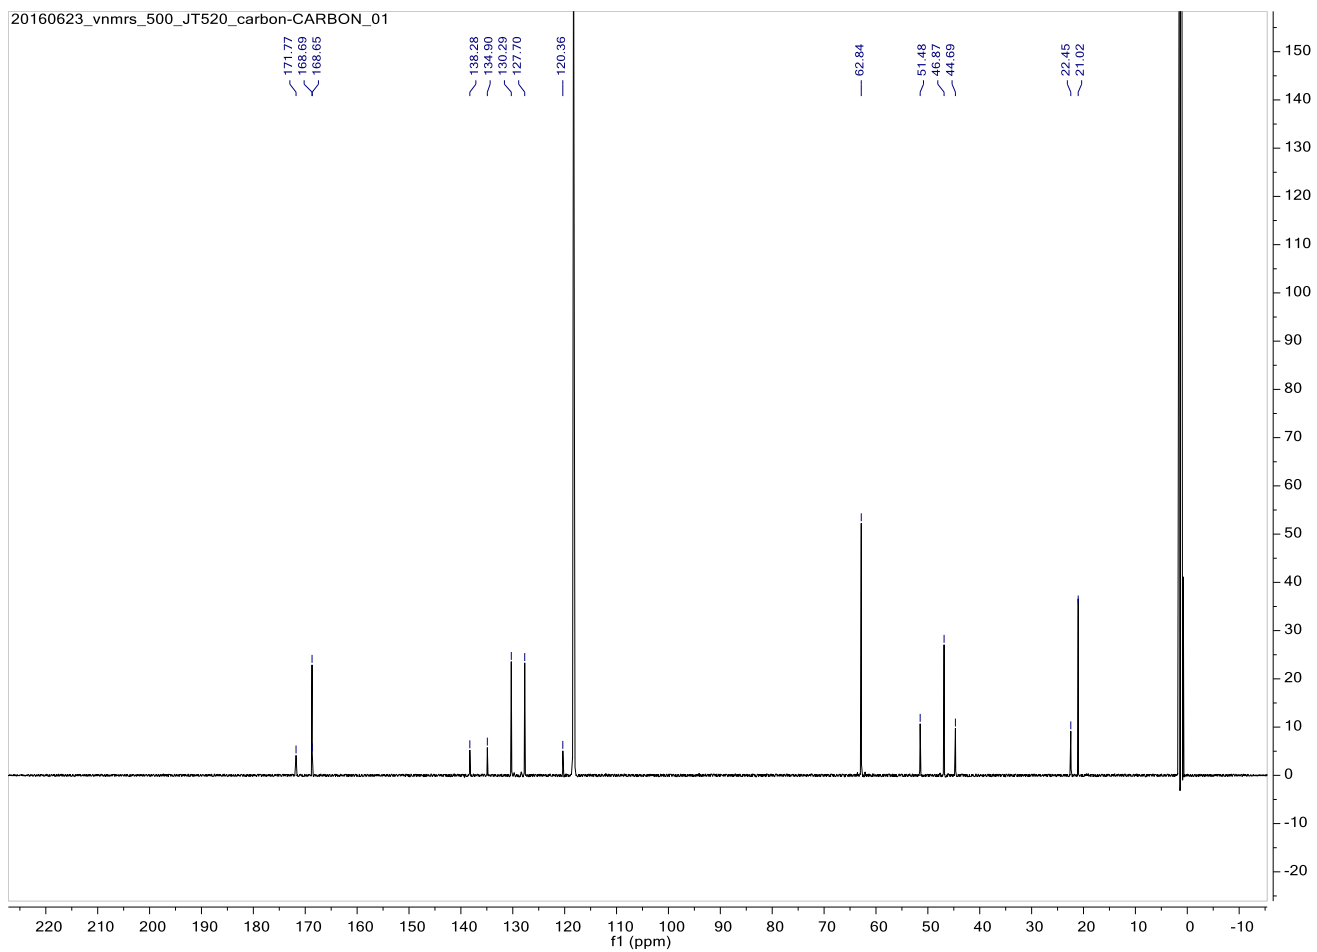

535

536

537

**Supplementary Figure 33:**  $^{13}\text{C}$  NMR of **4d** in acetonitrile- $d_3$  at 25 °C.

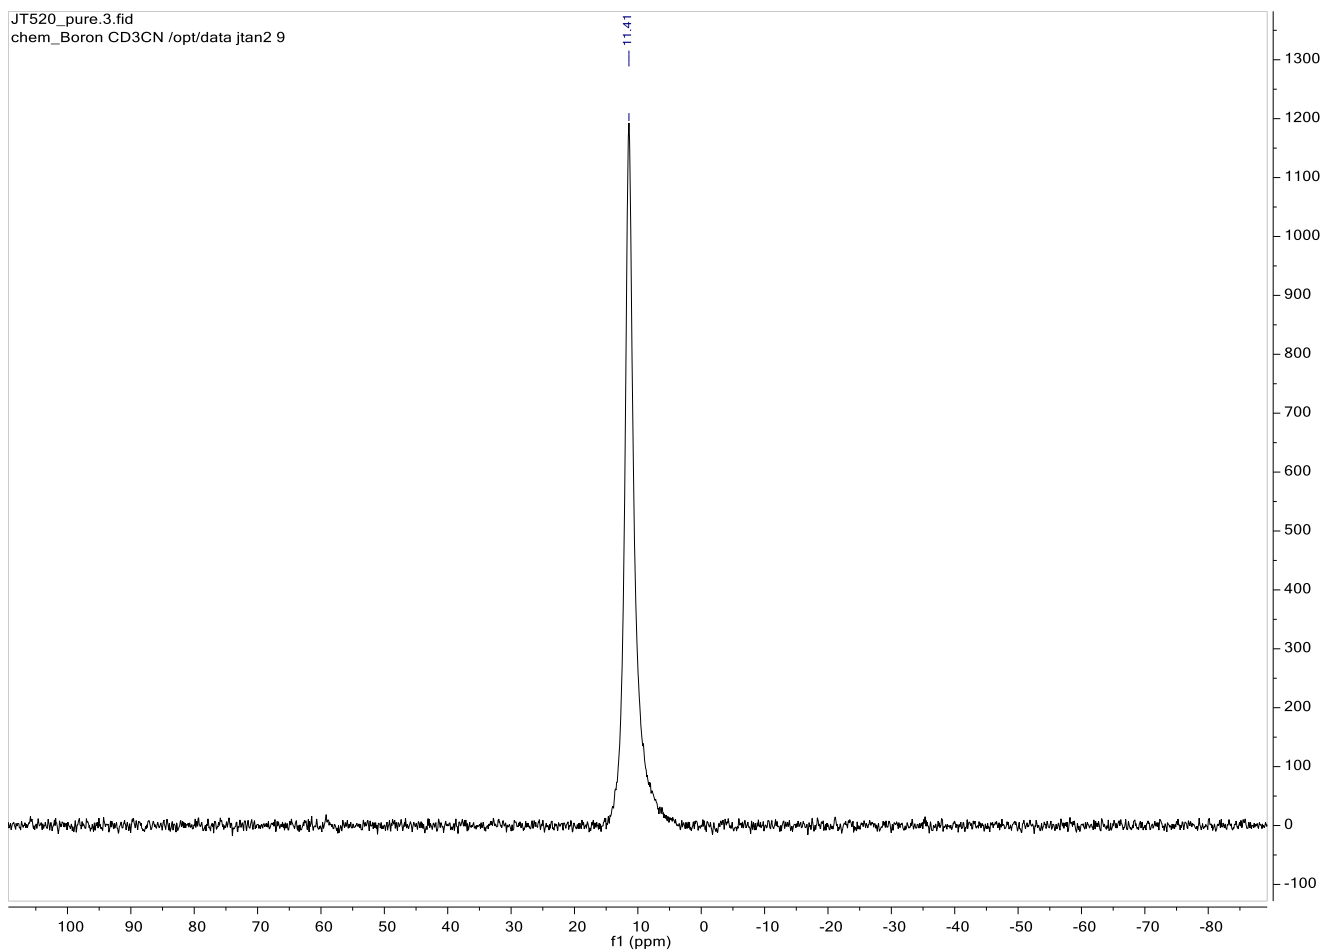

538

539

540

**Supplementary Figure 34:**  $^{11}\text{B}$  NMR of **4d** in acetonitrile- $d_3$  at 25 °C.

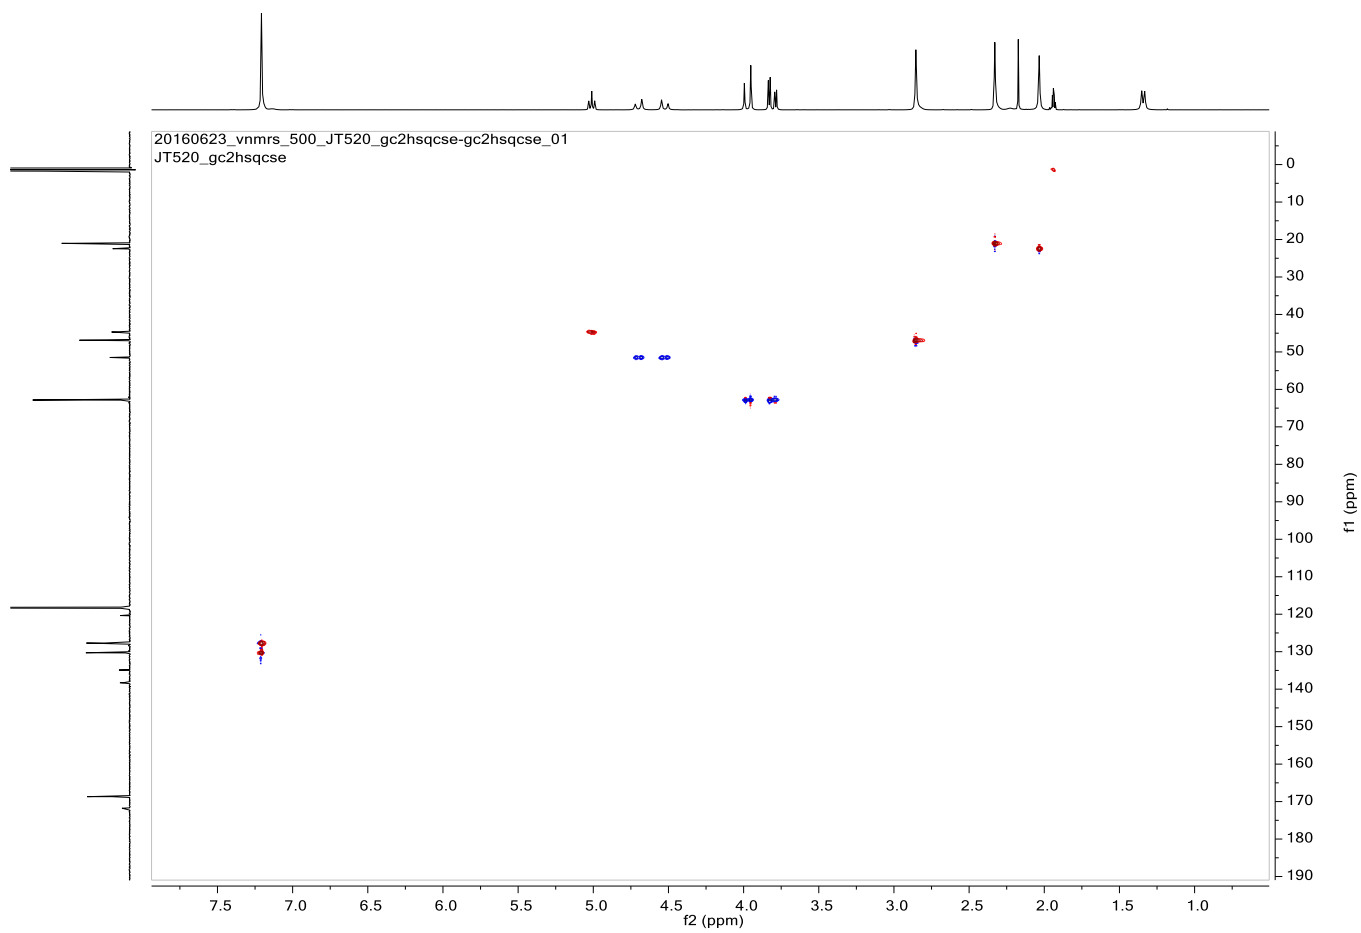

541

542

**Supplementary Figure 35:**  $^1\text{H}$ - $^{13}\text{C}$  HSQC NMR of **4d** in acetonitrile- $d_3$  at 25 °C.

543 Compound **4e**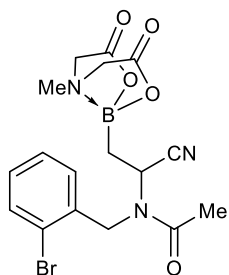

544

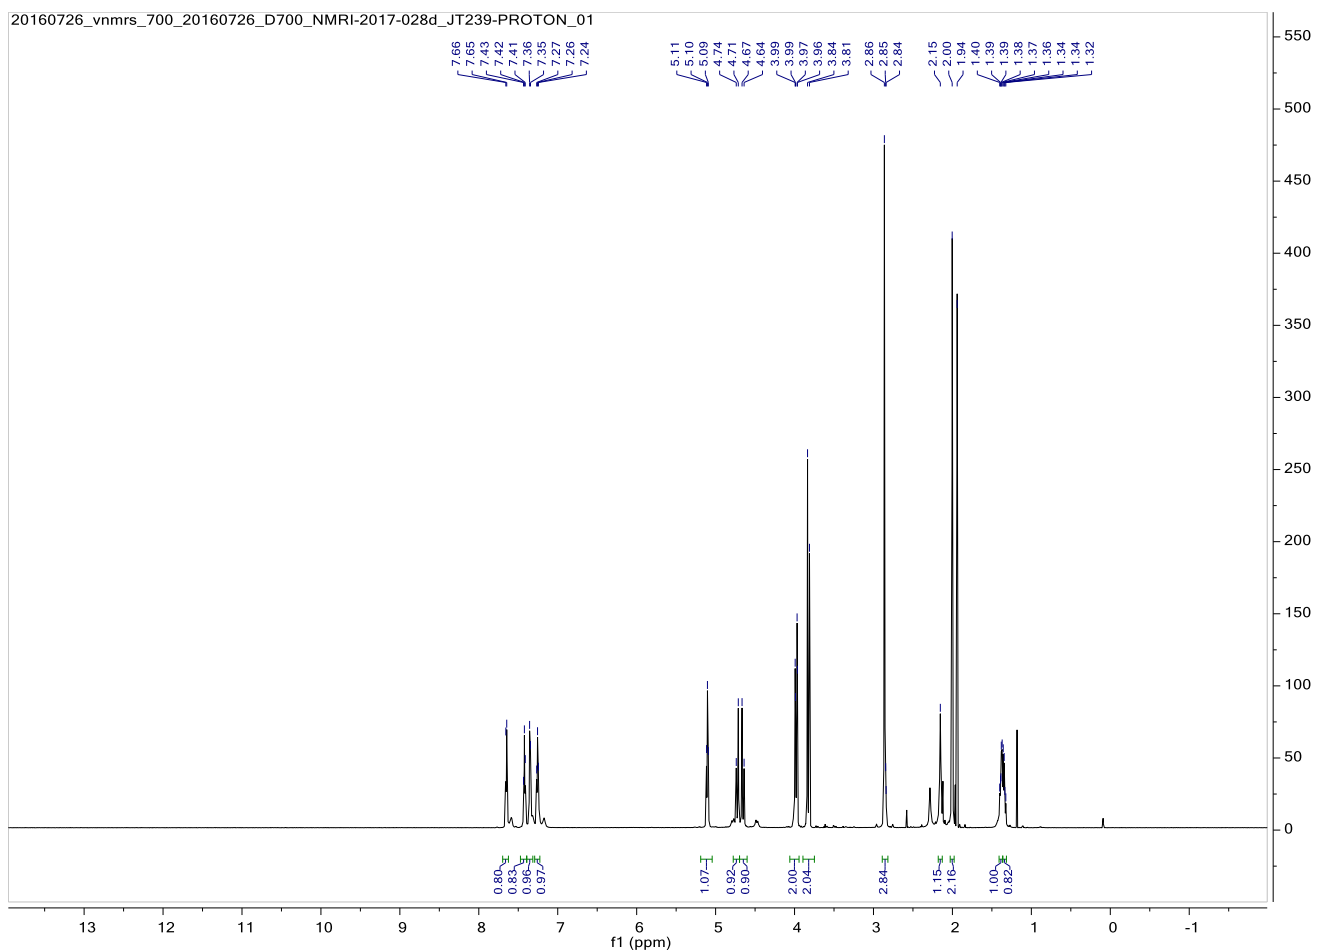

545

546

547

**Supplementary Figure 36:** <sup>1</sup>H NMR of **4e** in acetonitrile-*d*<sub>3</sub> at 25 °C.

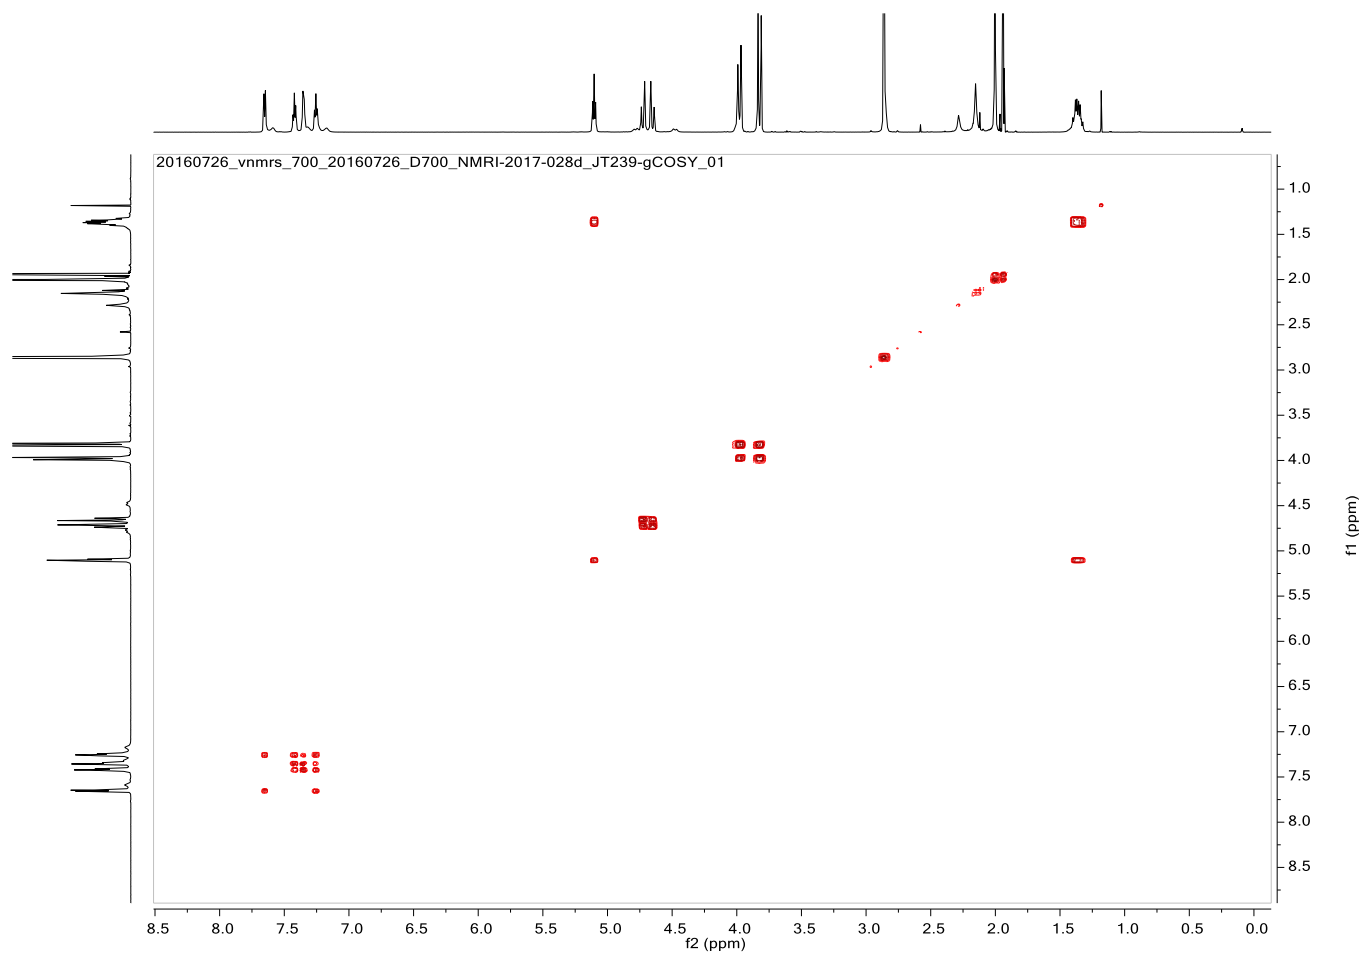

548

549

550

**Supplementary Figure 37:**  $^1\text{H}$ - $^1\text{H}$  COSY of **4e** in acetonitrile- $d_3$  at 25 °C.

20161220\_vnmrs\_500\_JT239\_13C-HSQC-CARBON\_01  
JT239\_13C-HSQC

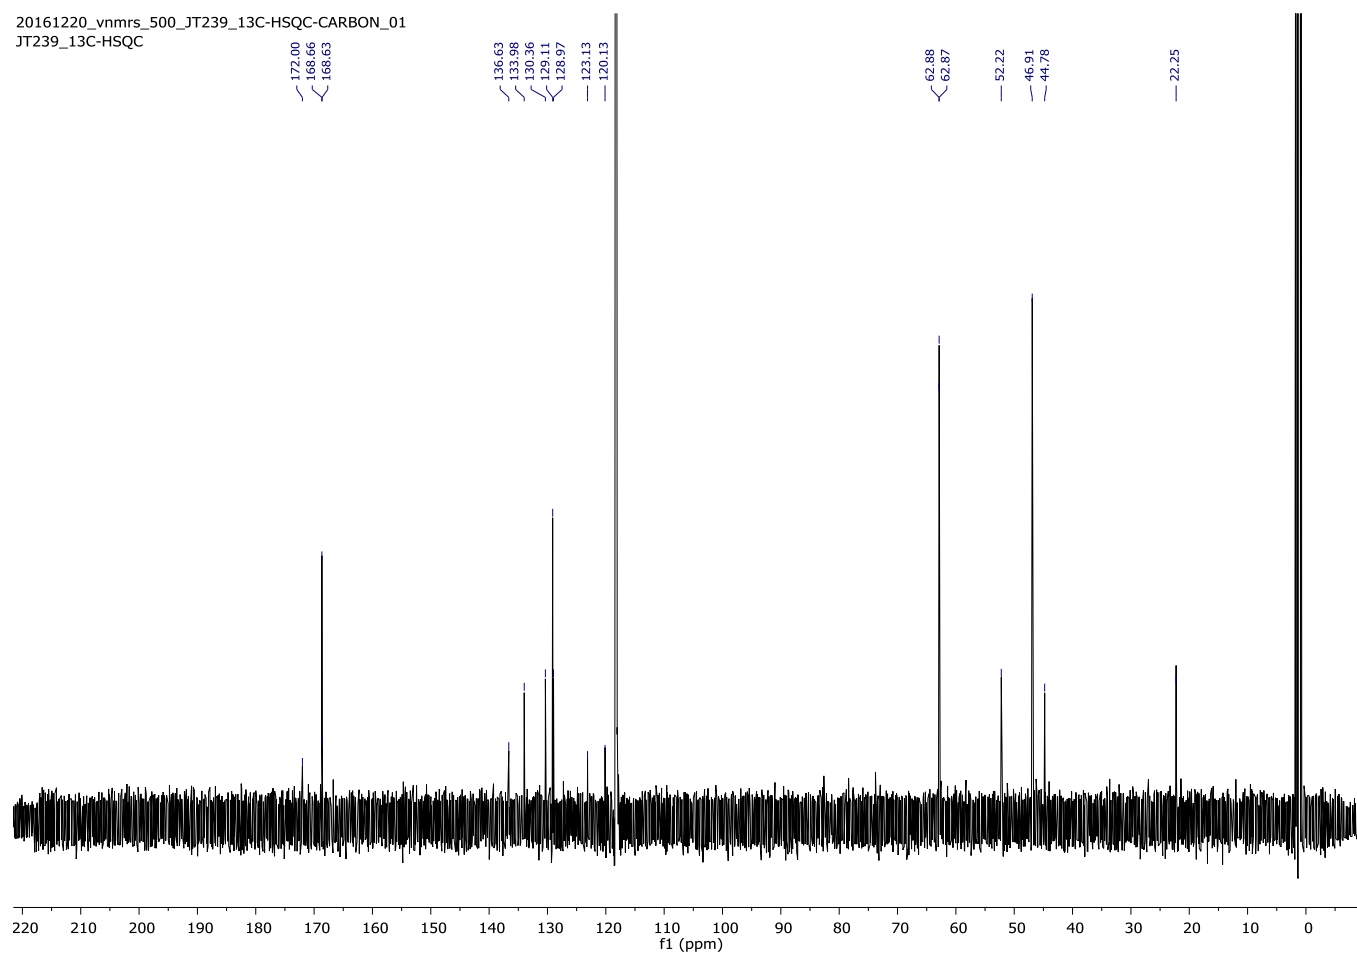

Supplementary Figure 38:  $^{13}\text{C}$  NMR of **4e** in acetonitrile- $d_3$  at 25 °C.

551

552

553

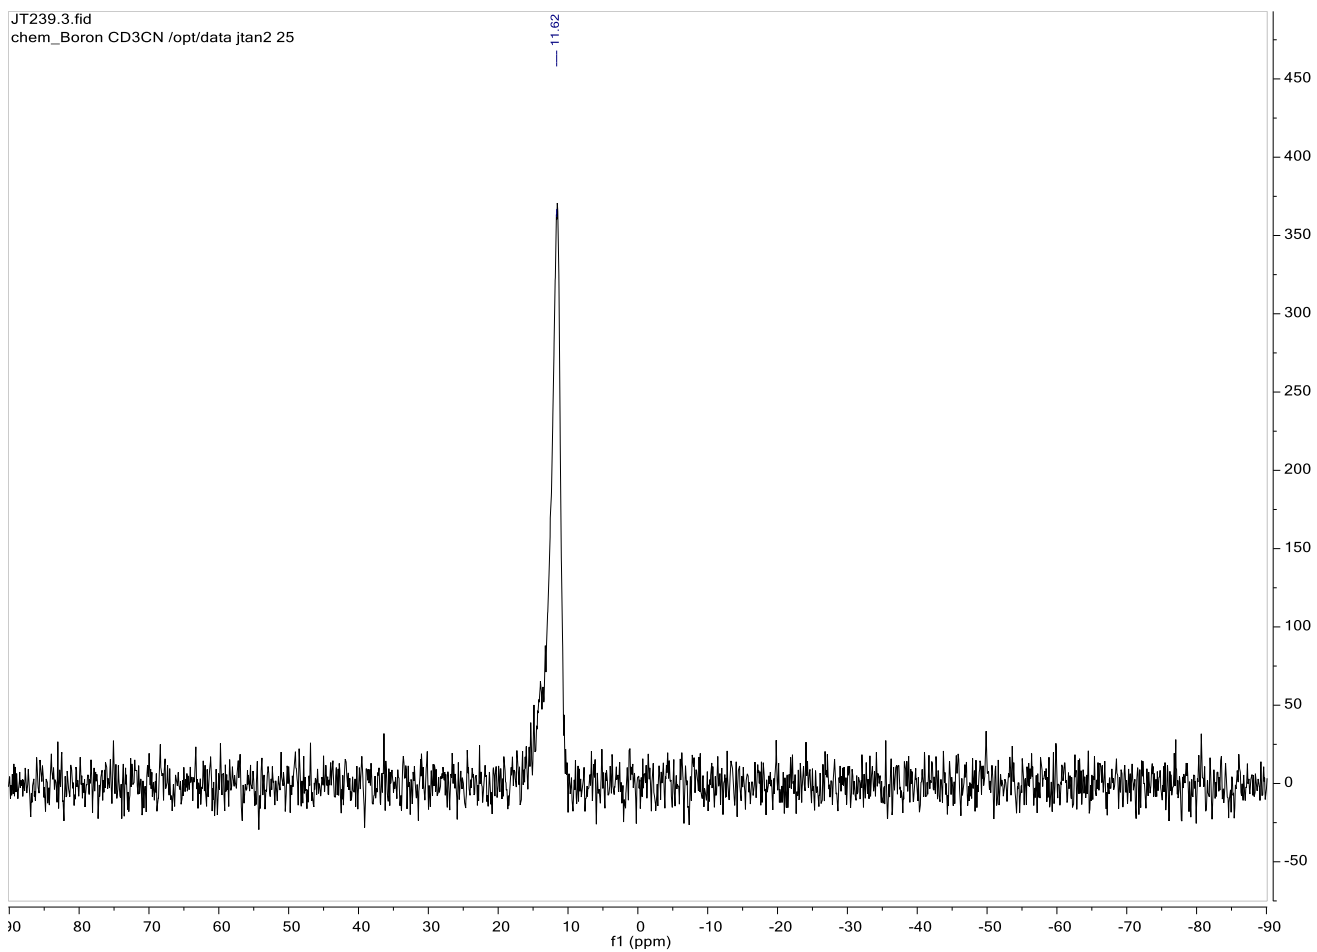

554

555

556

**Supplementary Figure 39:**  $^{11}\text{B}$  NMR of **4e** in acetonitrile- $d_3$  at 25 °C.

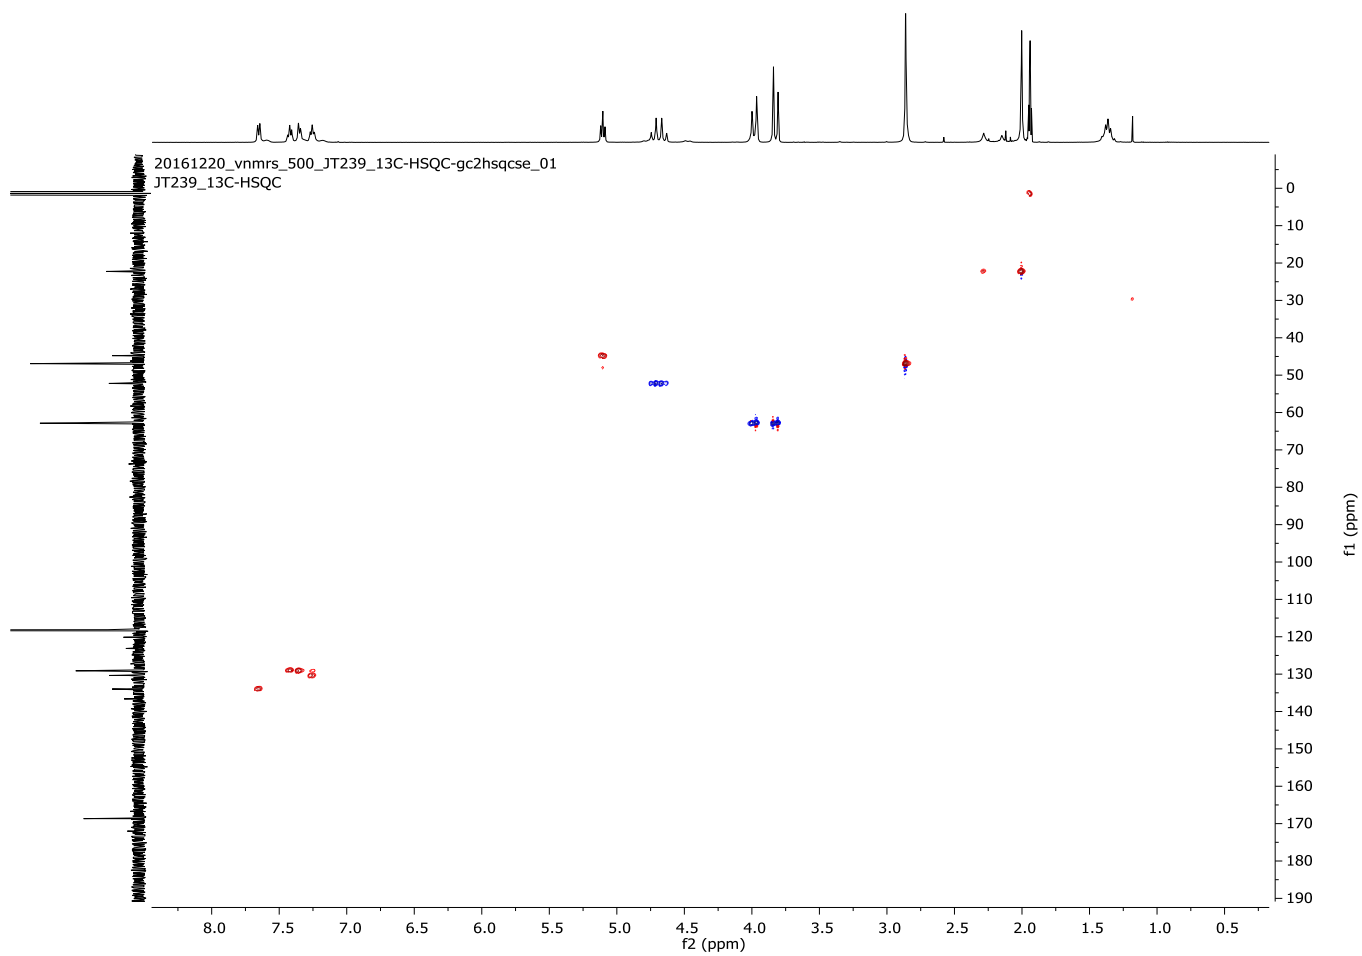

557

558

**Supplementary Figure 40:**  $^1\text{H}$ - $^{13}\text{C}$  HSQC NMR of **4e** in acetonitrile- $d_3$  at 25 °C.

559



560 Compound **4f**

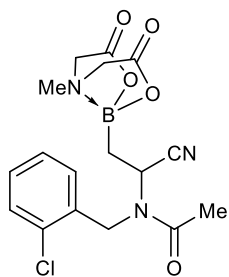

561

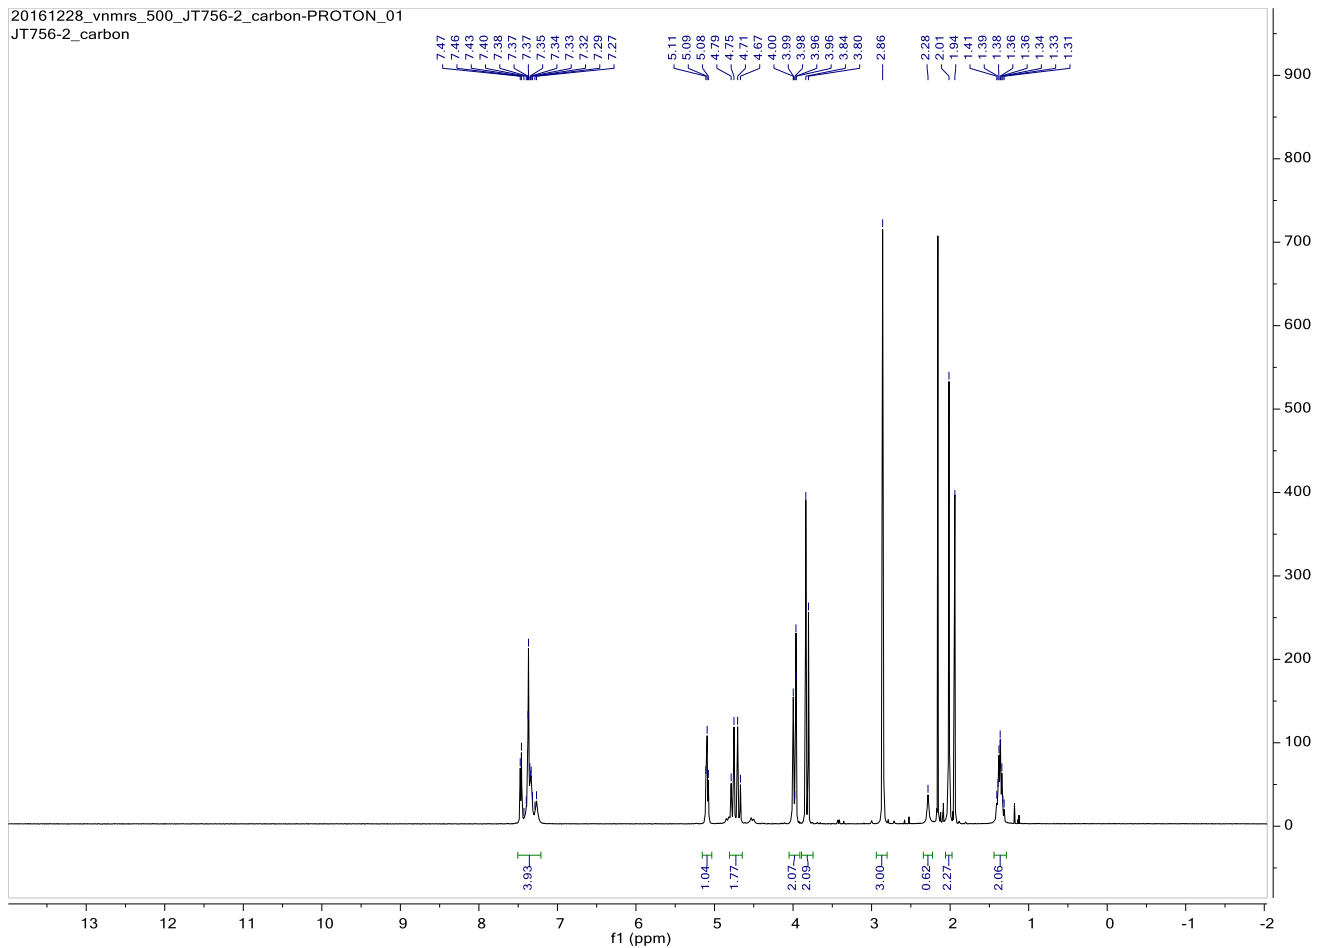

562

563

564

Supplementary Figure 41:  $^1\text{H}$  NMR of **4f** in acetonitrile- $d_3$  at 25 °C.

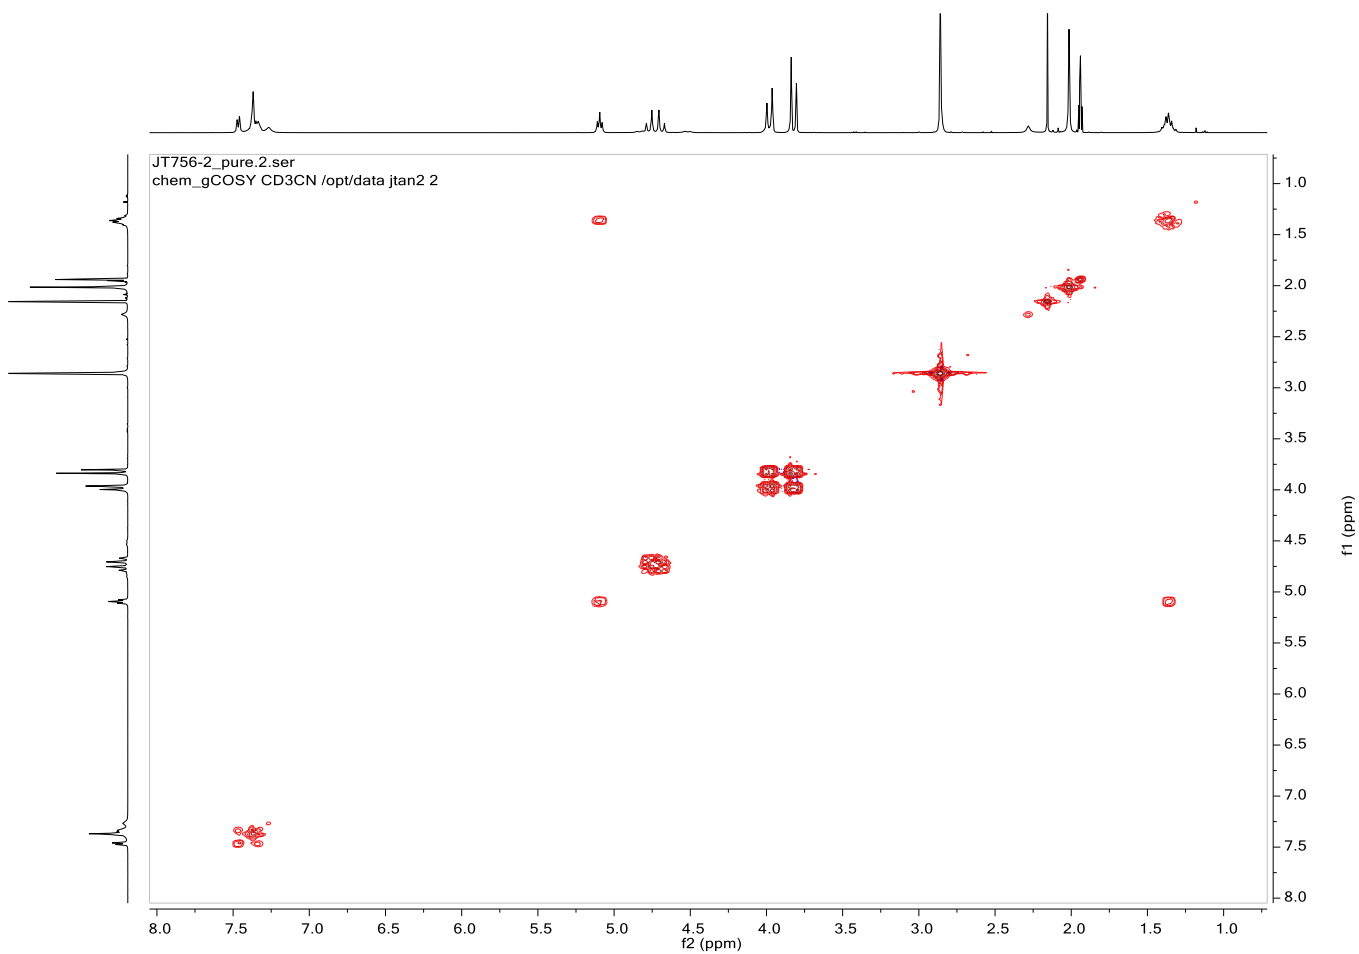

565

566

567

**Supplementary Figure 42:**  $^1\text{H}$ - $^1\text{H}$  COSY of **4f** in acetonitrile- $d_3$  at 25 °C.

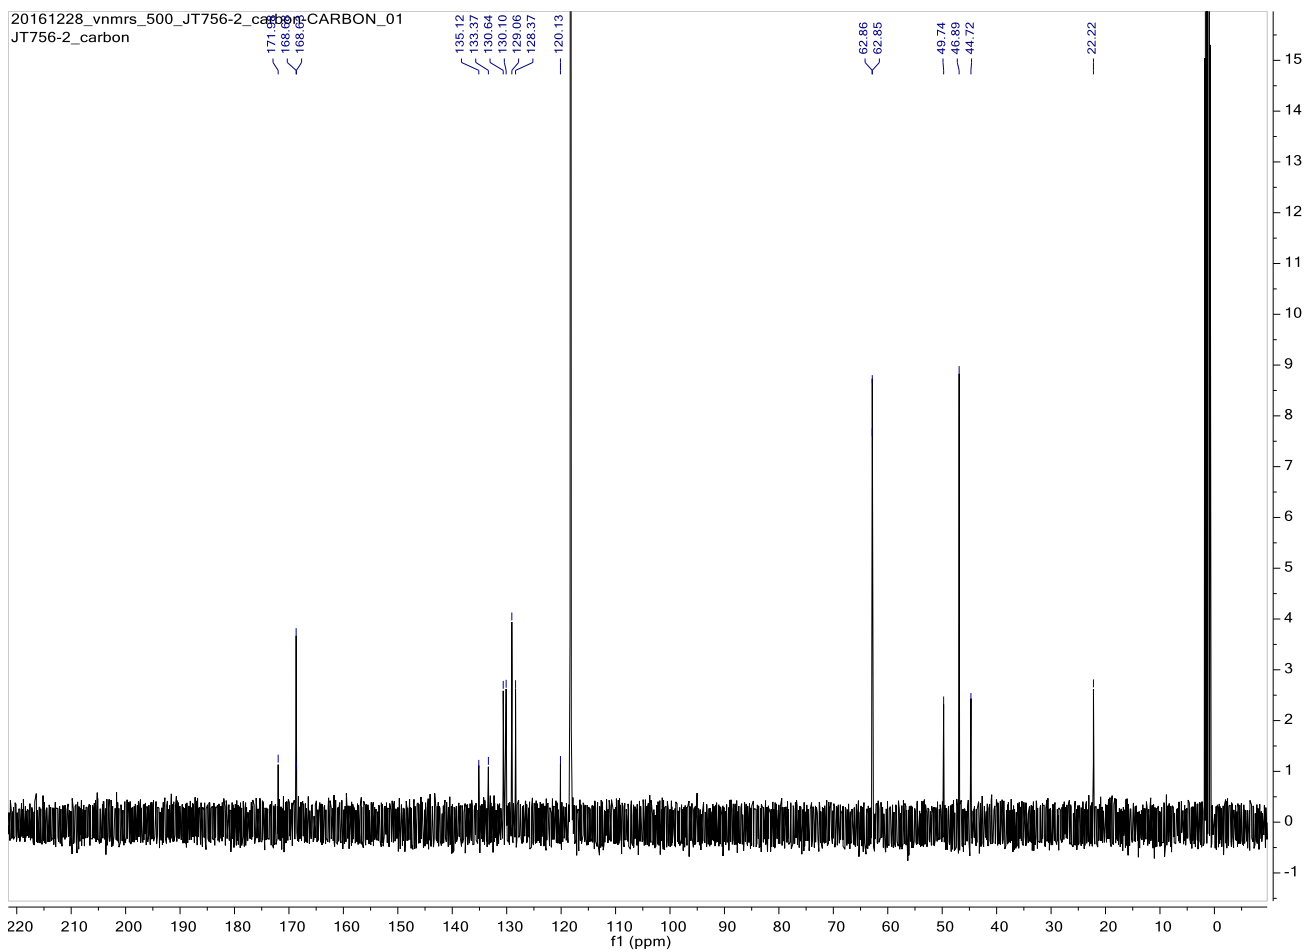

568

569

570

Supplementary Figure 43:  $^{13}\text{C}$  NMR of **4f** in acetonitrile- $d_3$  at 25 °C.

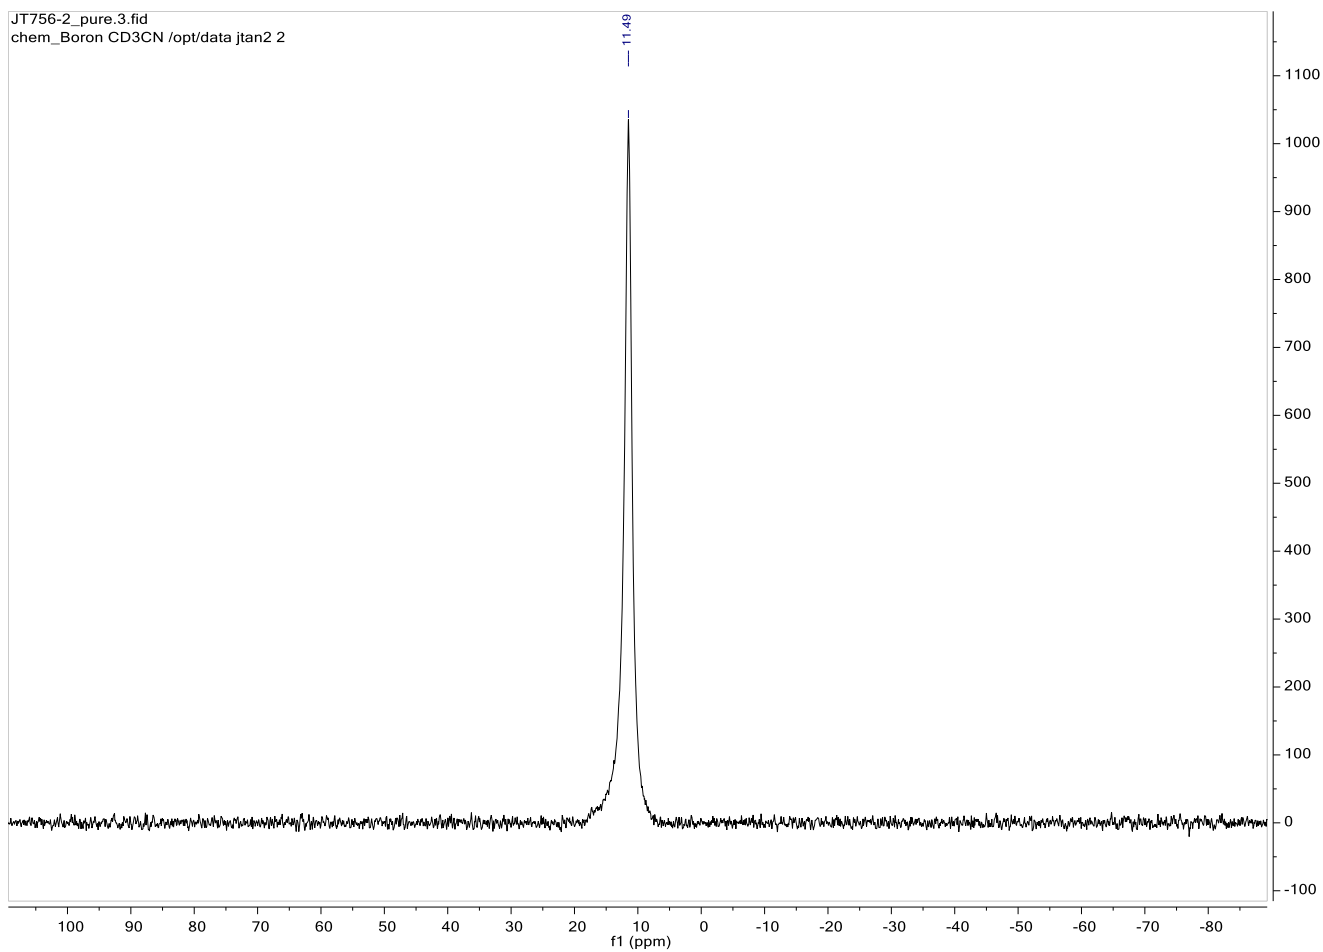

571

572

573

**Supplementary Figure 44:**  $^{11}\text{B}$  NMR of **4f** in acetonitrile- $d_3$  at 25 °C.

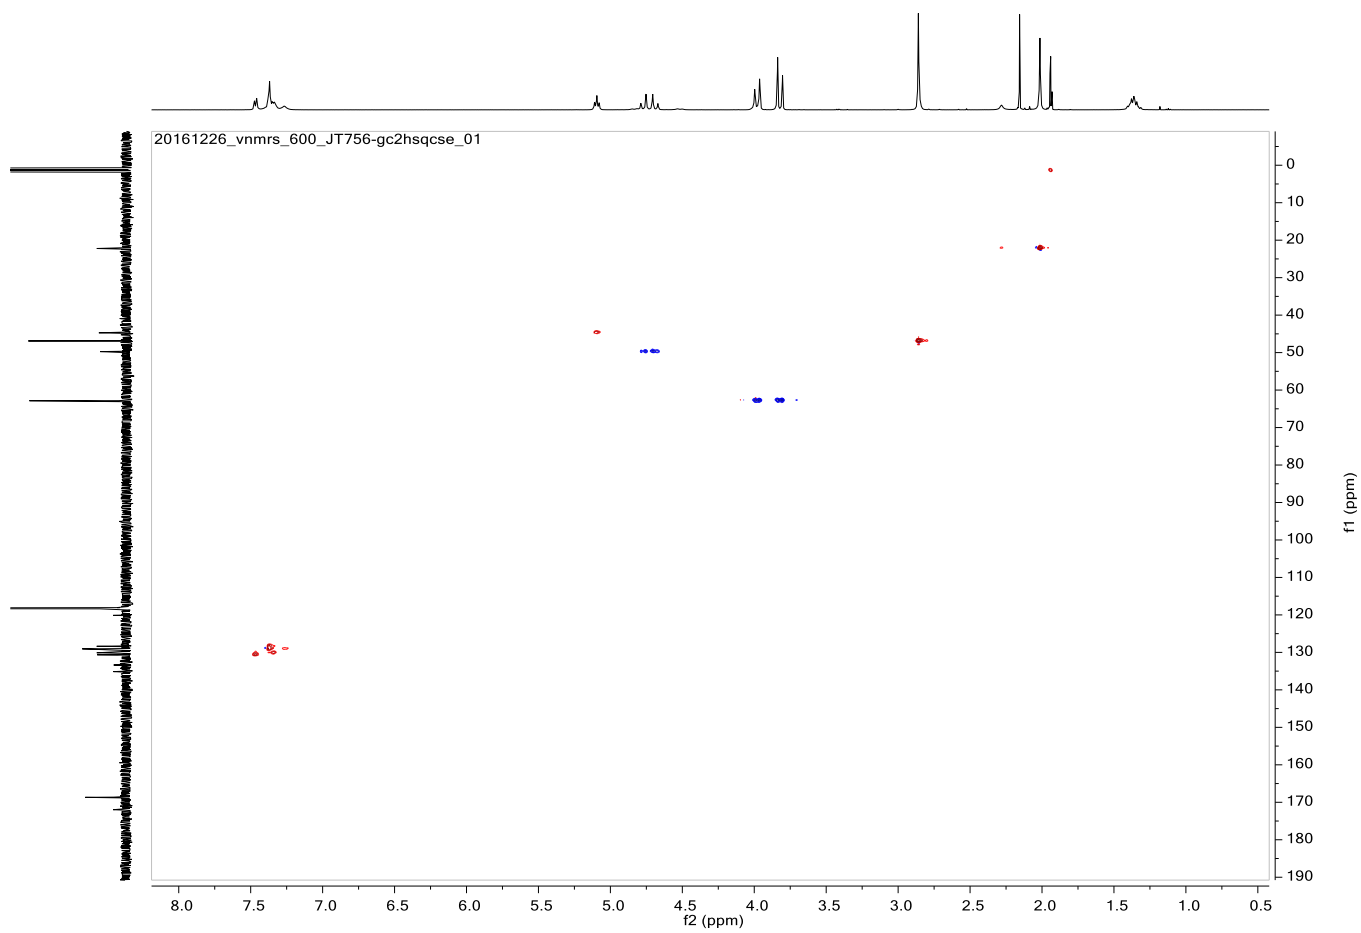

574

575

**Supplementary Figure 45:**  $^1\text{H}$ - $^{13}\text{C}$  HSQC NMR of **4f** in acetonitrile- $d_3$  at 25 °C.

576 Compound **4g**

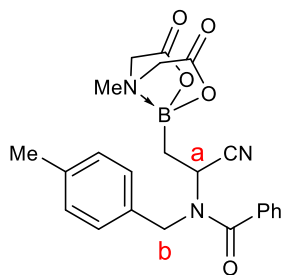

577

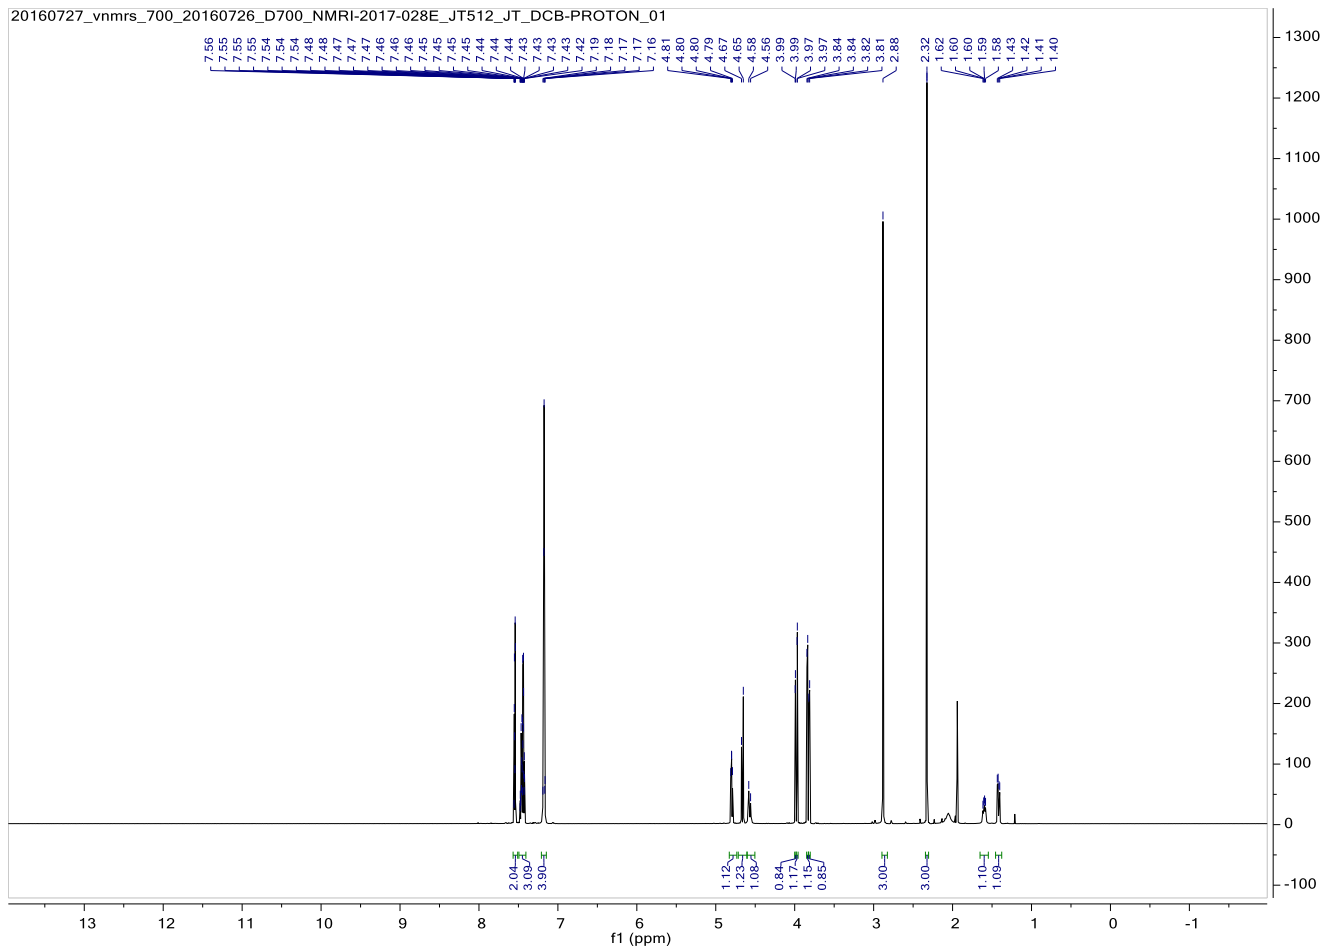

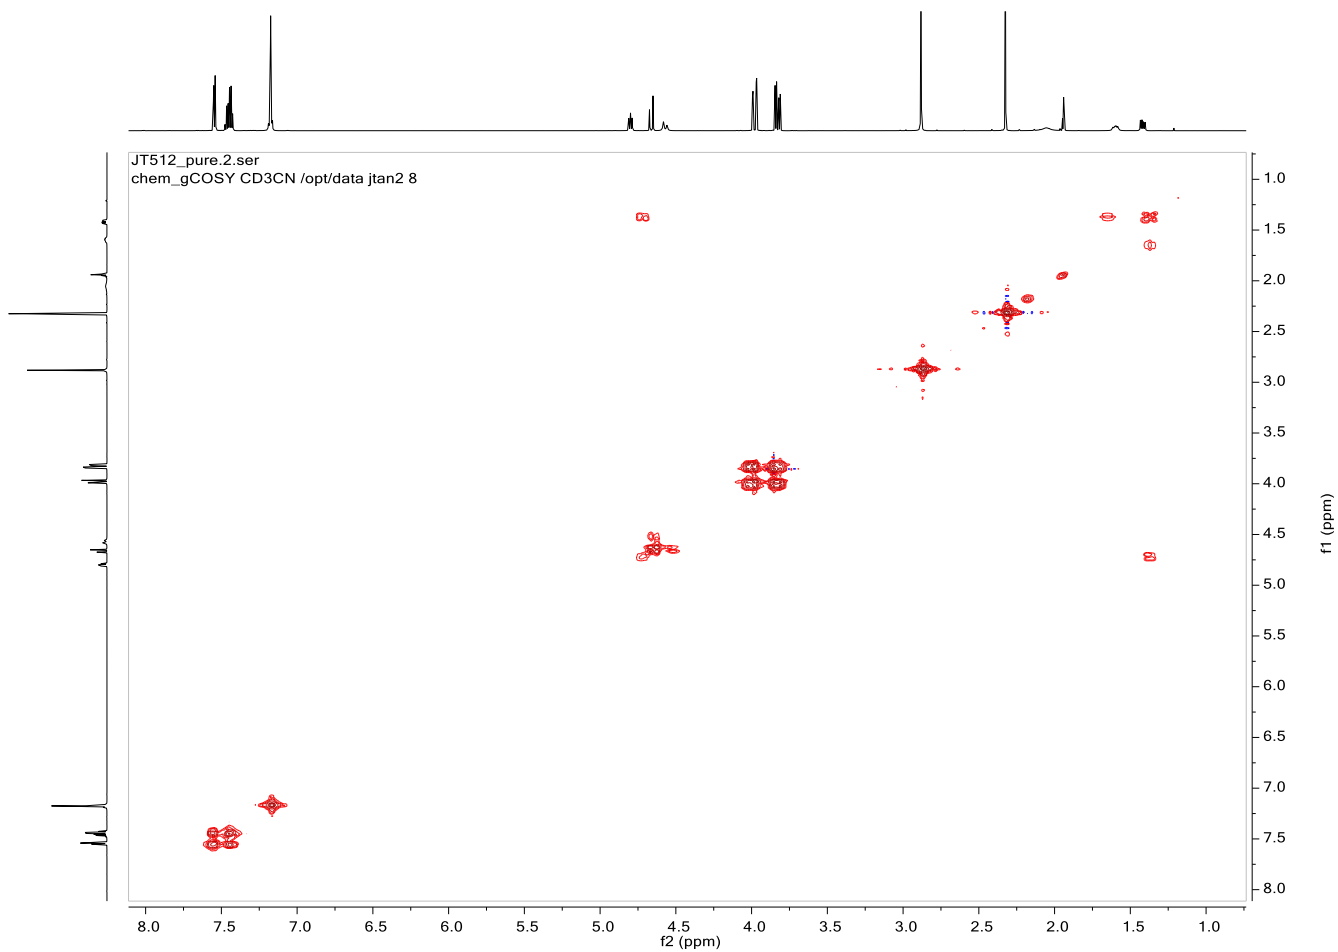

581

582

583

**Supplementary Figure 47:**  $^1\text{H}$ - $^1\text{H}$  COSY of **4g** in acetonitrile- $d_3$  at 25 °C.

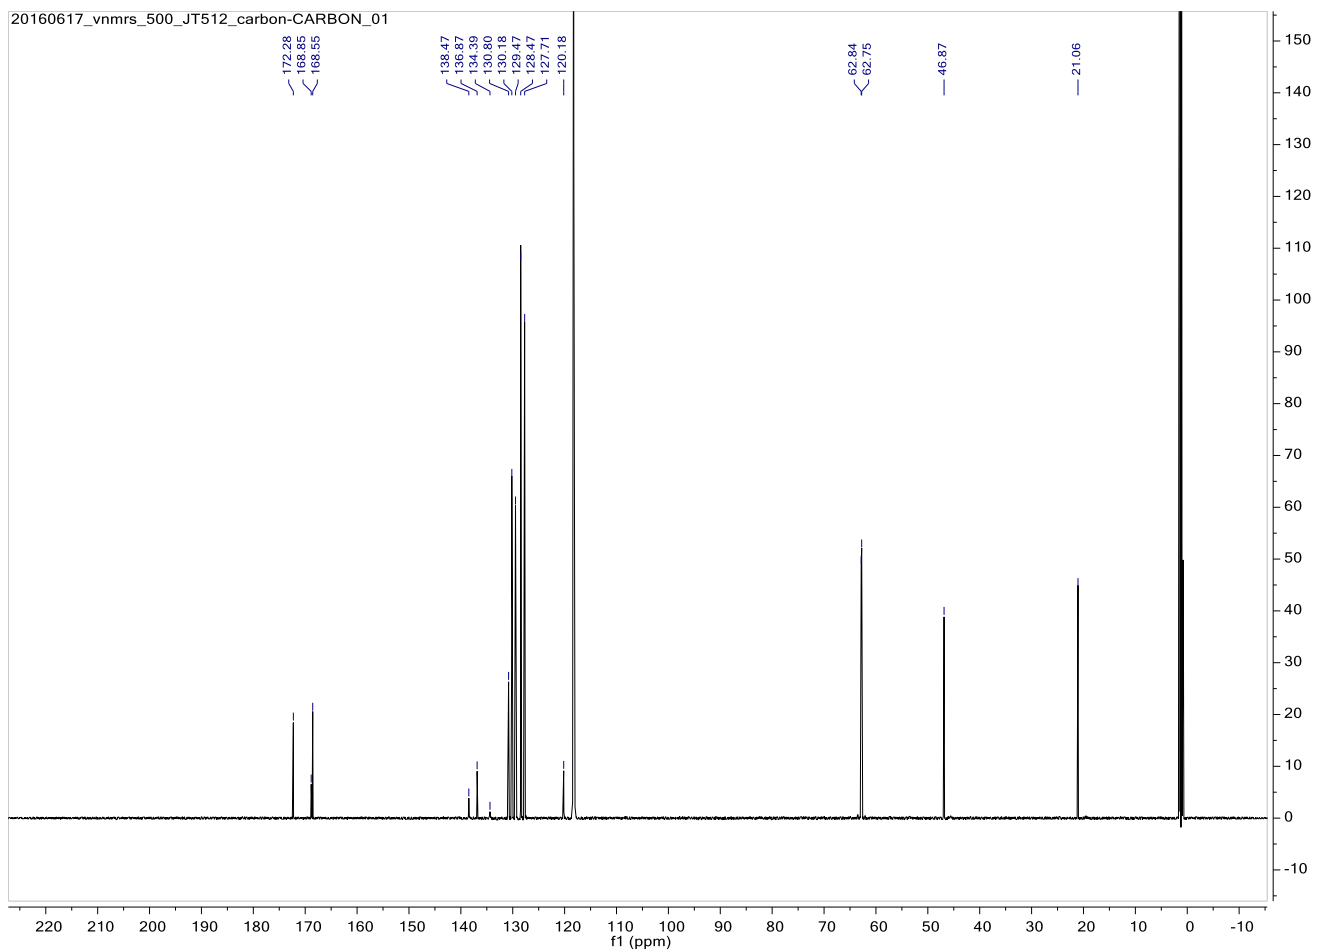

584

585

586

**Supplementary Figure 48:**  $^{13}\text{C}$  NMR of **4g** in acetonitrile- $d_3$  at 25 °C.



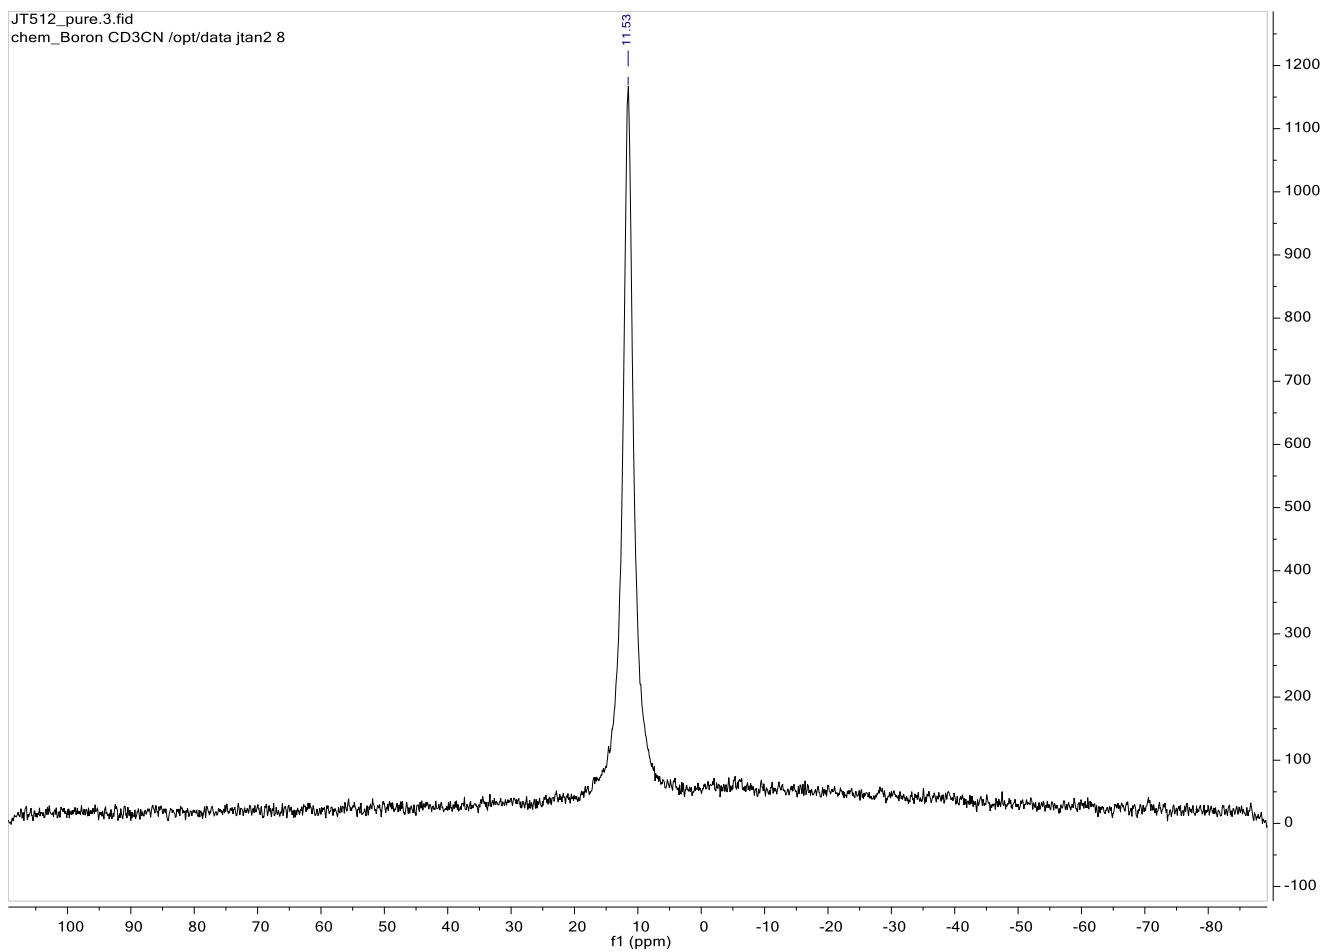

587

588

**Supplementary Figure 49:**  $^{11}\text{B}$  NMR of **4g** in acetonitrile- $d_3$  at 25 °C.

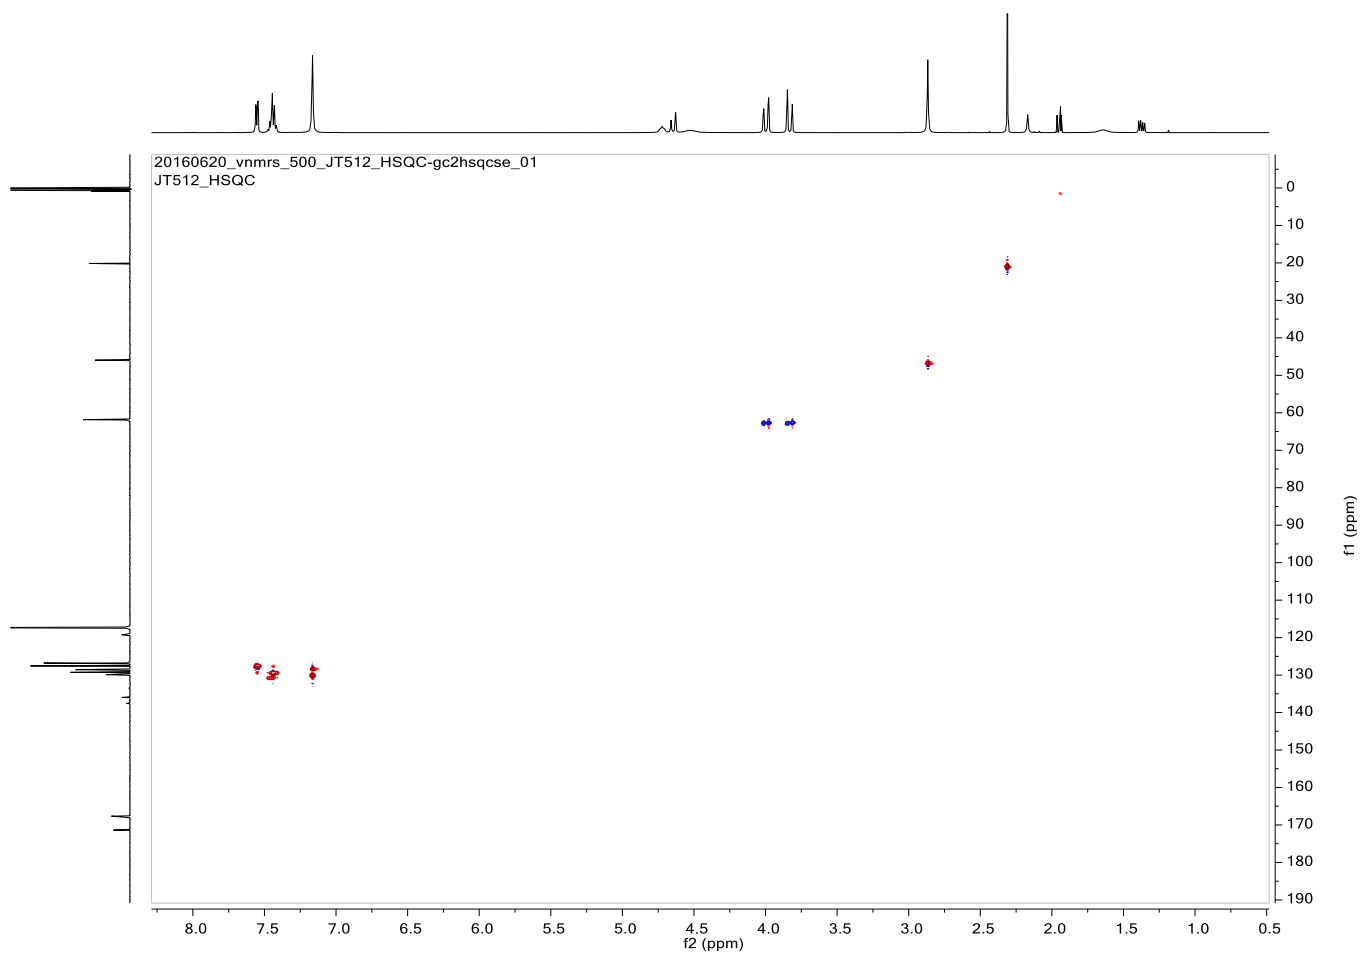

589

590

**Supplementary Figure 50:**  $^1\text{H}$ - $^{13}\text{C}$  HSQC NMR of **4g** in acetonitrile- $d_3$  at 25 °C.

591 Compound **4h**

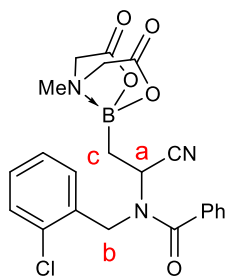

592

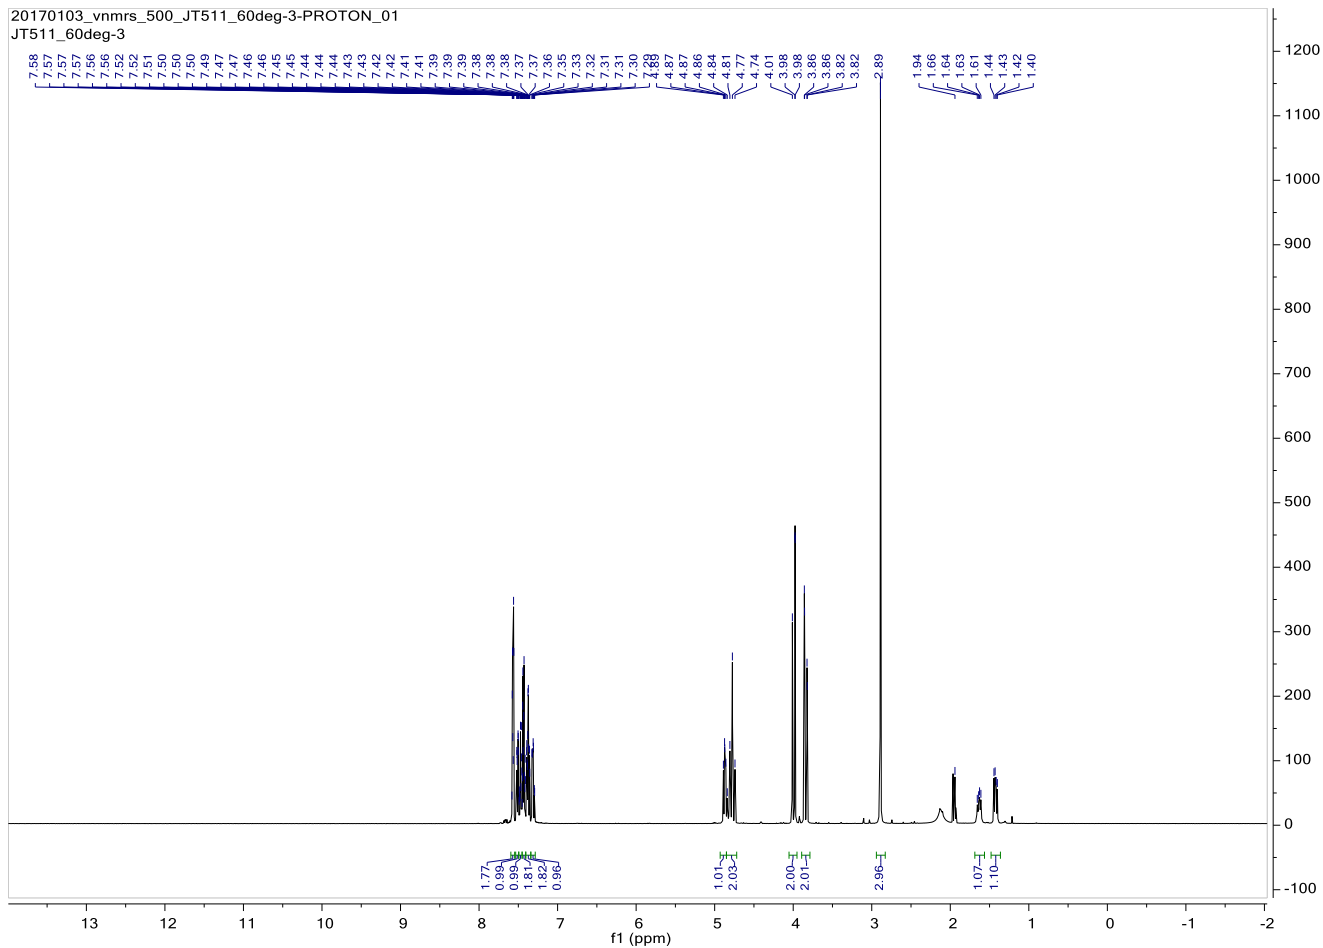

593

594

595

Supplementary Figure 51:  $^1\text{H}$  NMR of **4h** in acetonitrile- $d_3$  at 60 °C.

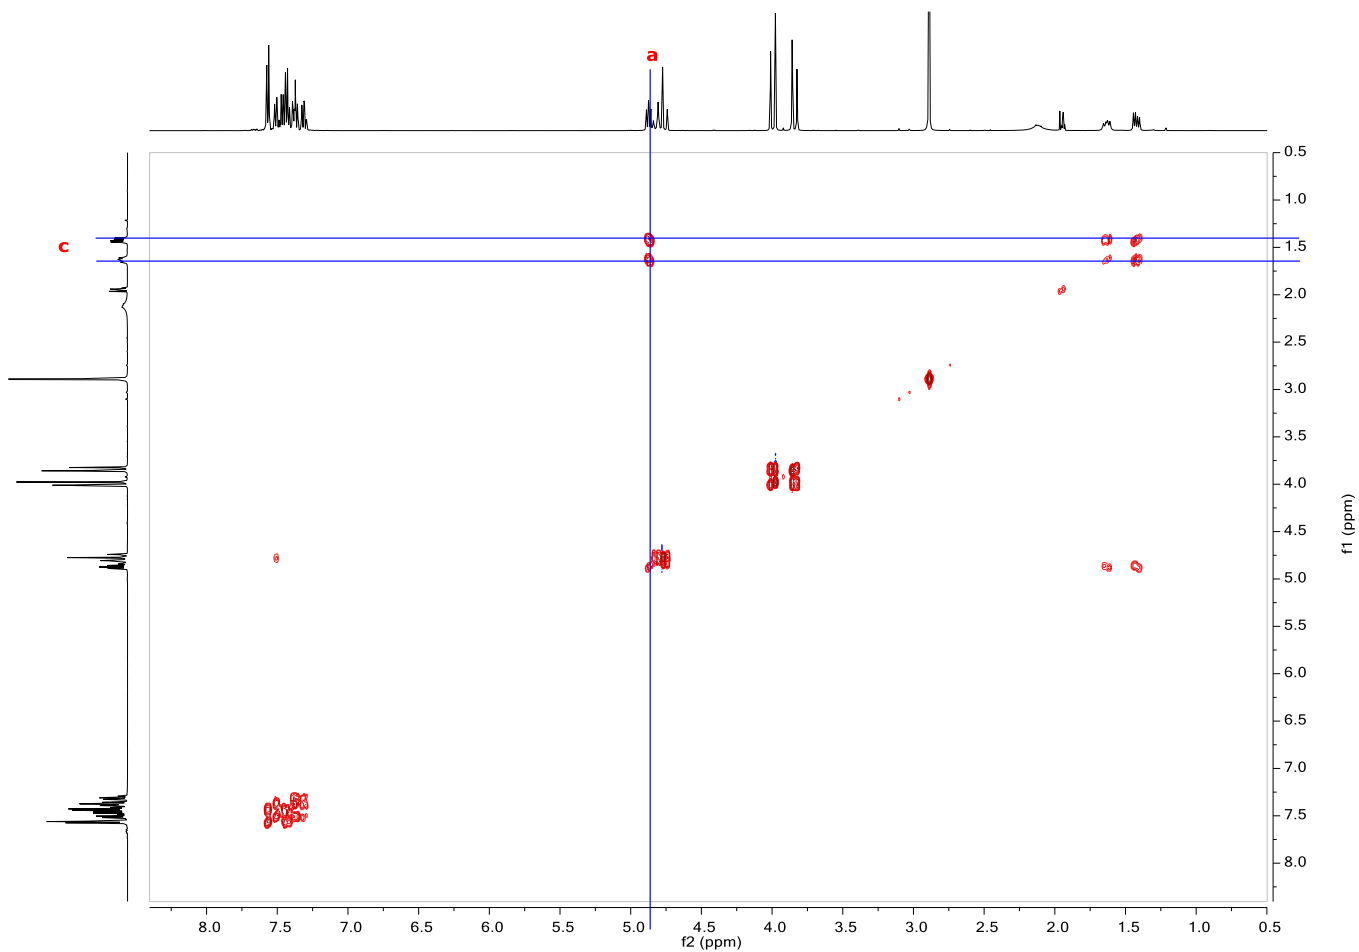

596

597

598

**Supplementary Figure 52:**  $^1\text{H}$ - $^1\text{H}$  COSY of **4h** in acetonitrile- $d_3$  at 60 °C.

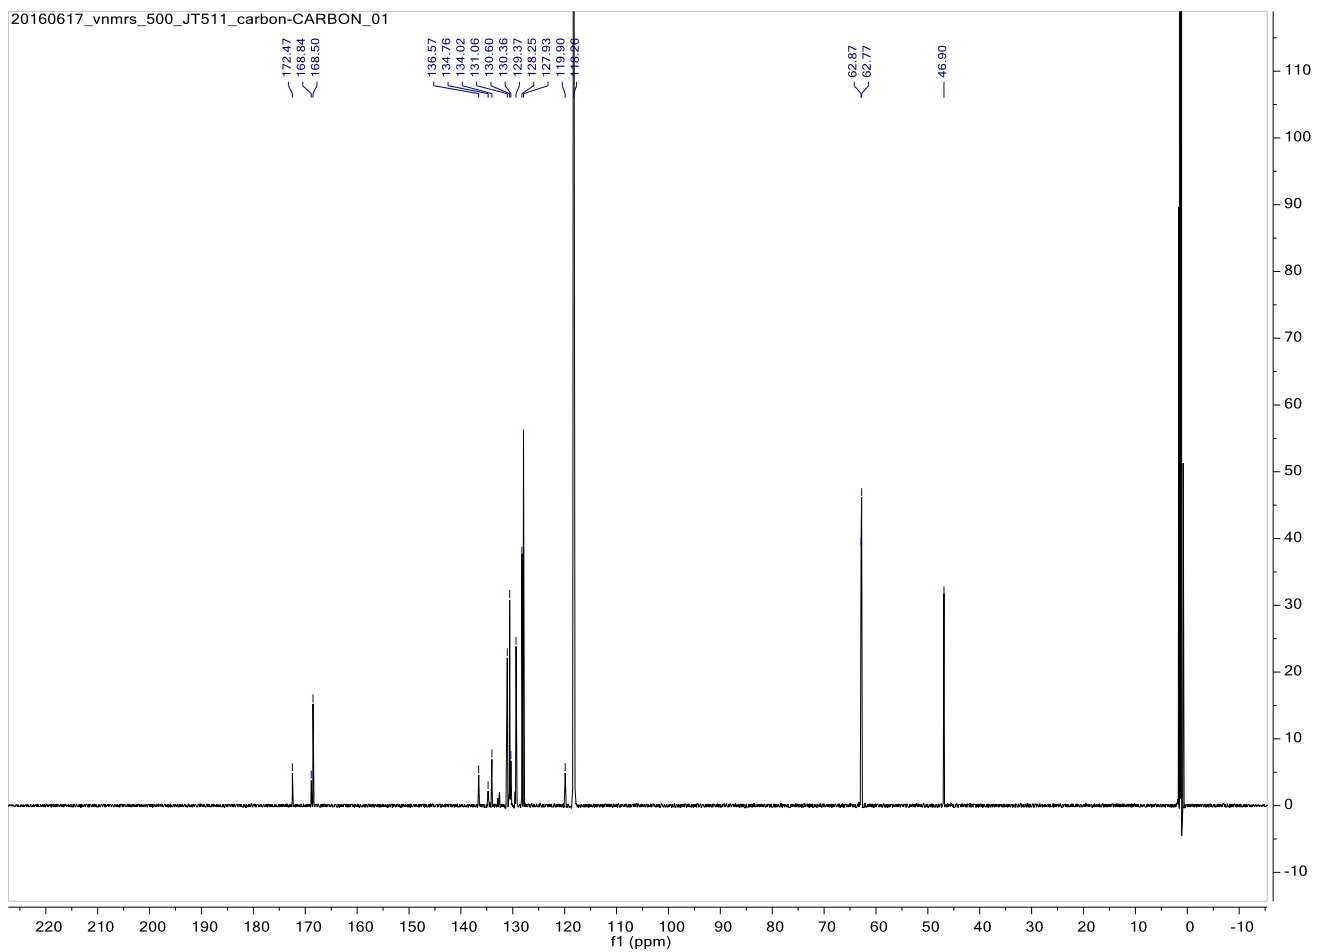

599

600

601

**Supplementary Figure 53:**  $^{13}\text{C}$  NMR of **4h** in acetonitrile- $d_3$  at 25 °C.

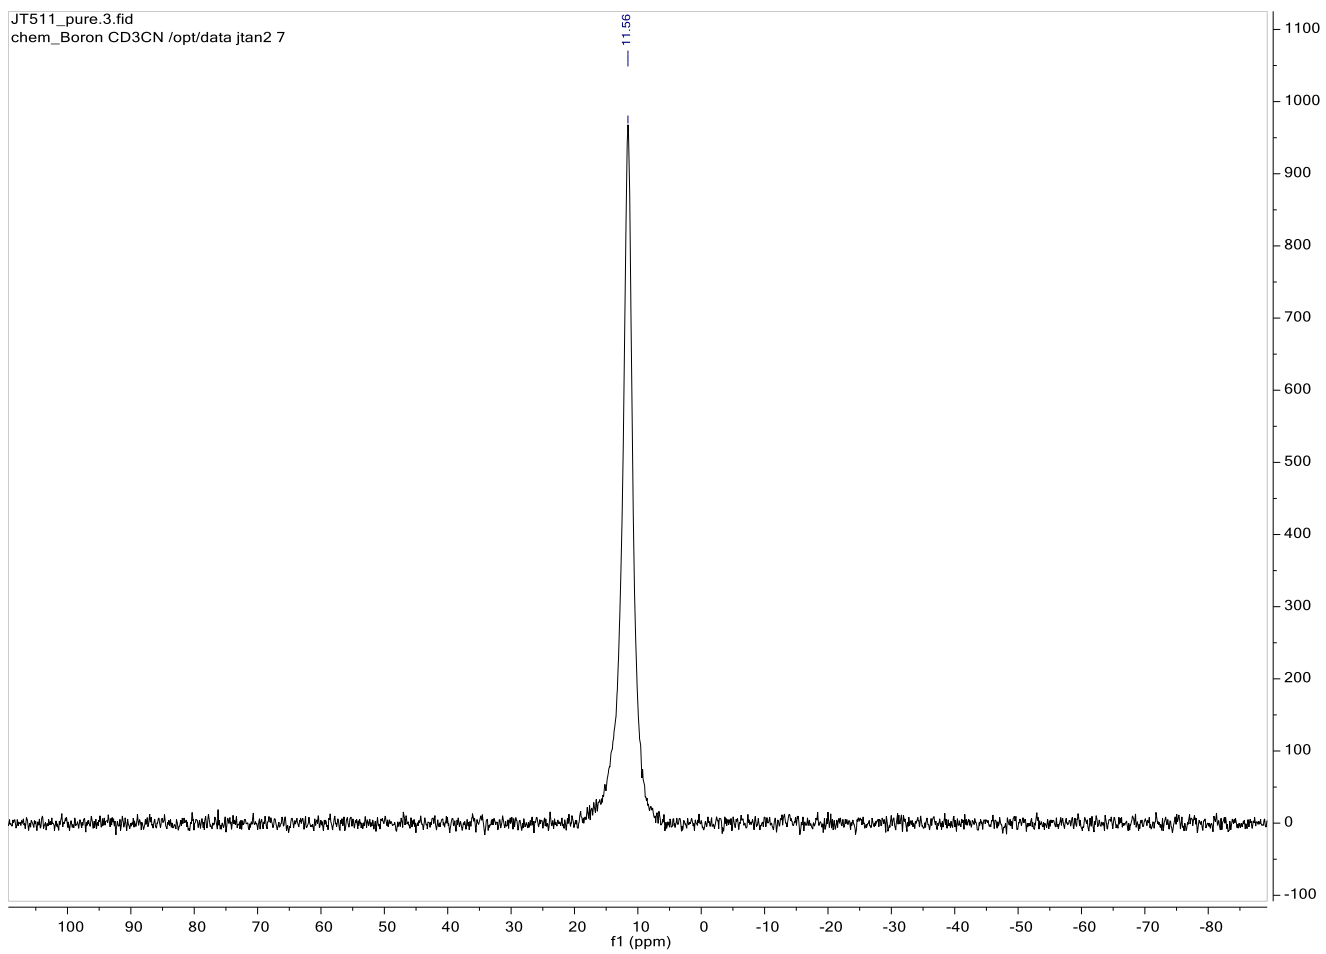

602  
603 **Supplementary Figure 54:**  $^{11}\text{B}$  NMR of **4h** in acetonitrile- $d_3$  at 25 °C.  
604

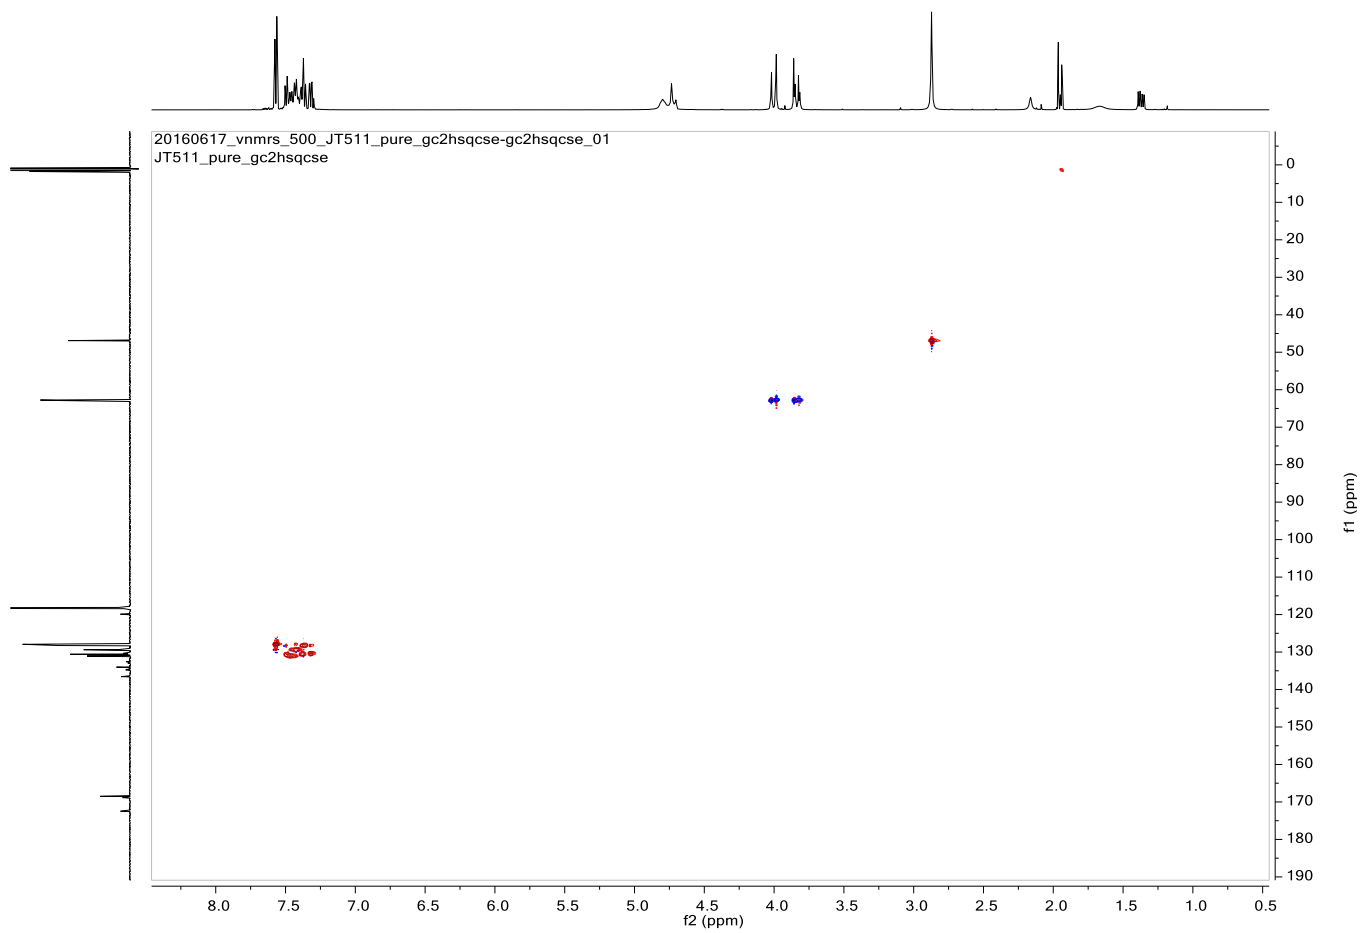

605

606

607

**Supplementary Figure 55:**  $^1\text{H}$ - $^{13}\text{C}$  HSQC NMR of **4h** in acetonitrile- $d_3$  at 25 °C.

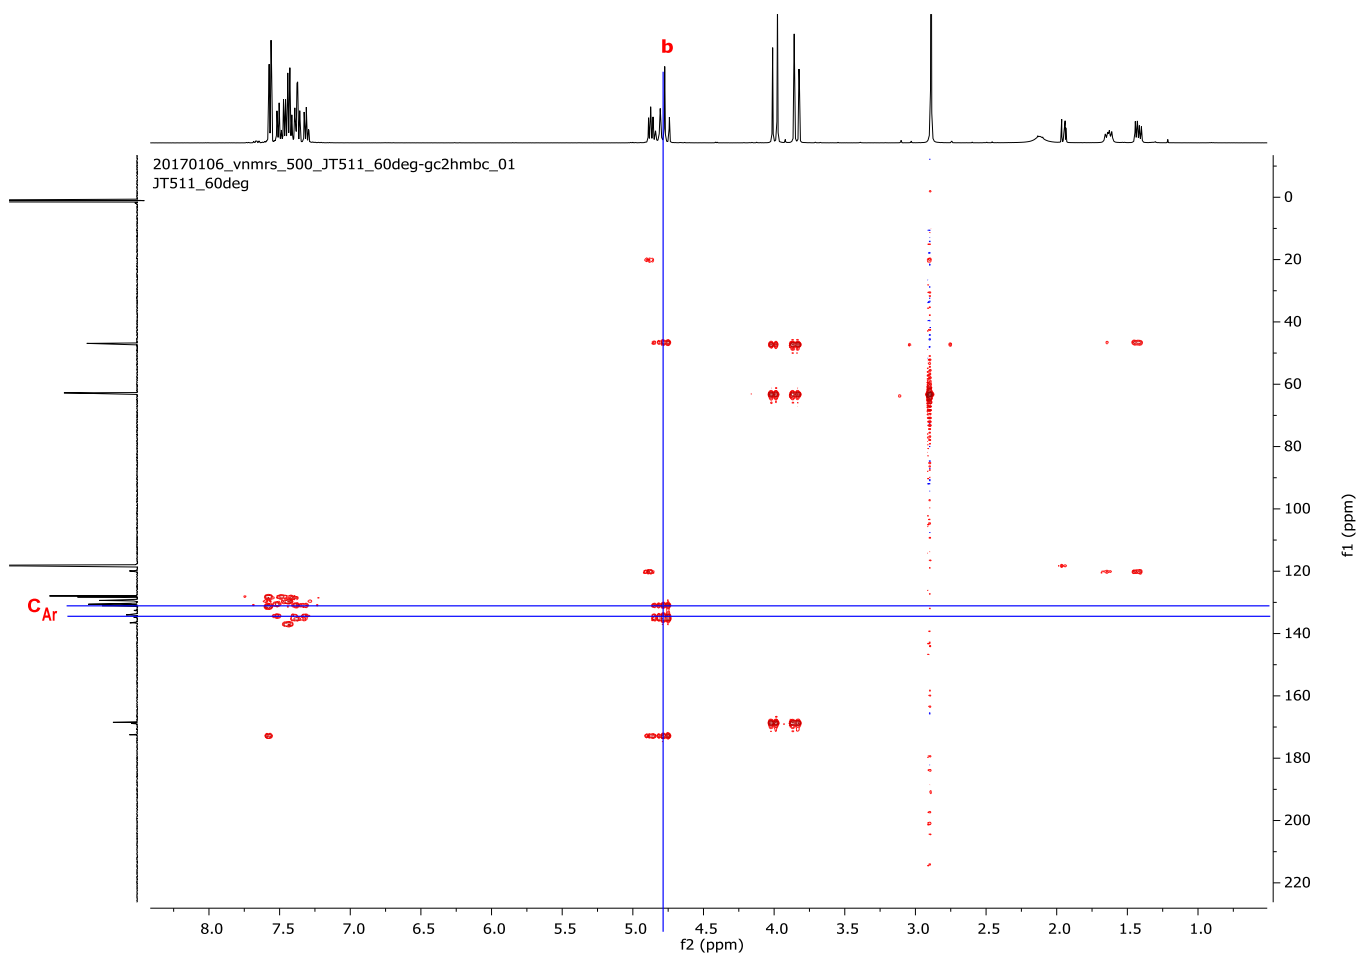

608

609

**Supplementary Figure 56:**  $^1\text{H}$ - $^{13}\text{C}$  HMBC NMR of **4h** in acetonitrile- $d_3$  at 60 °C.



610 Compound **4i**

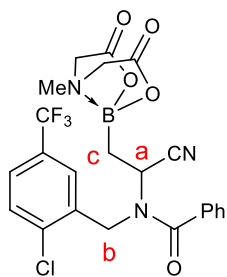

611

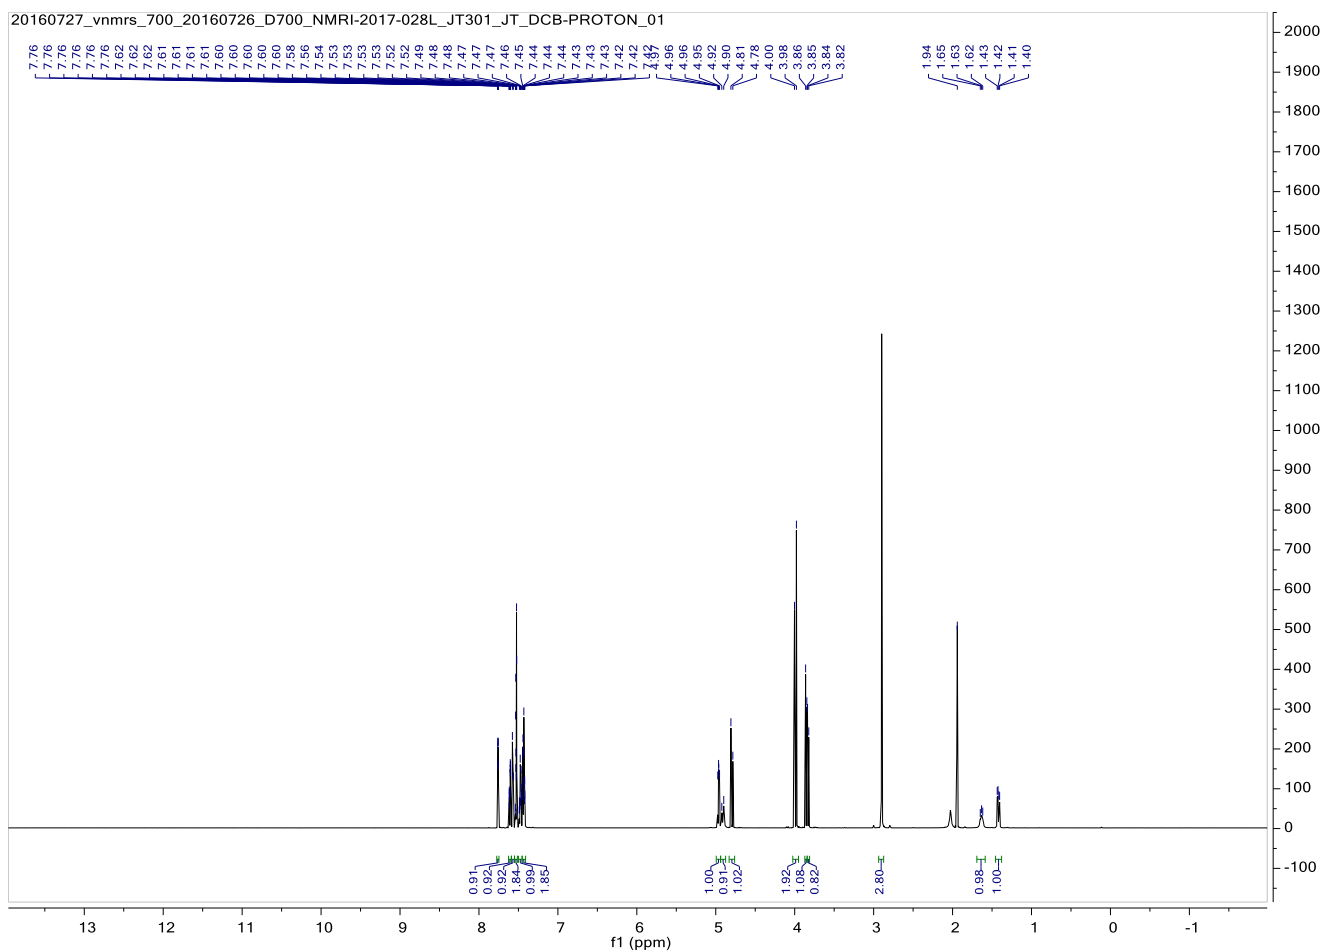

612

613

614

Supplementary Figure 57: <sup>1</sup>H NMR of **4i** in acetonitrile-*d*<sub>3</sub> at 60 °C.

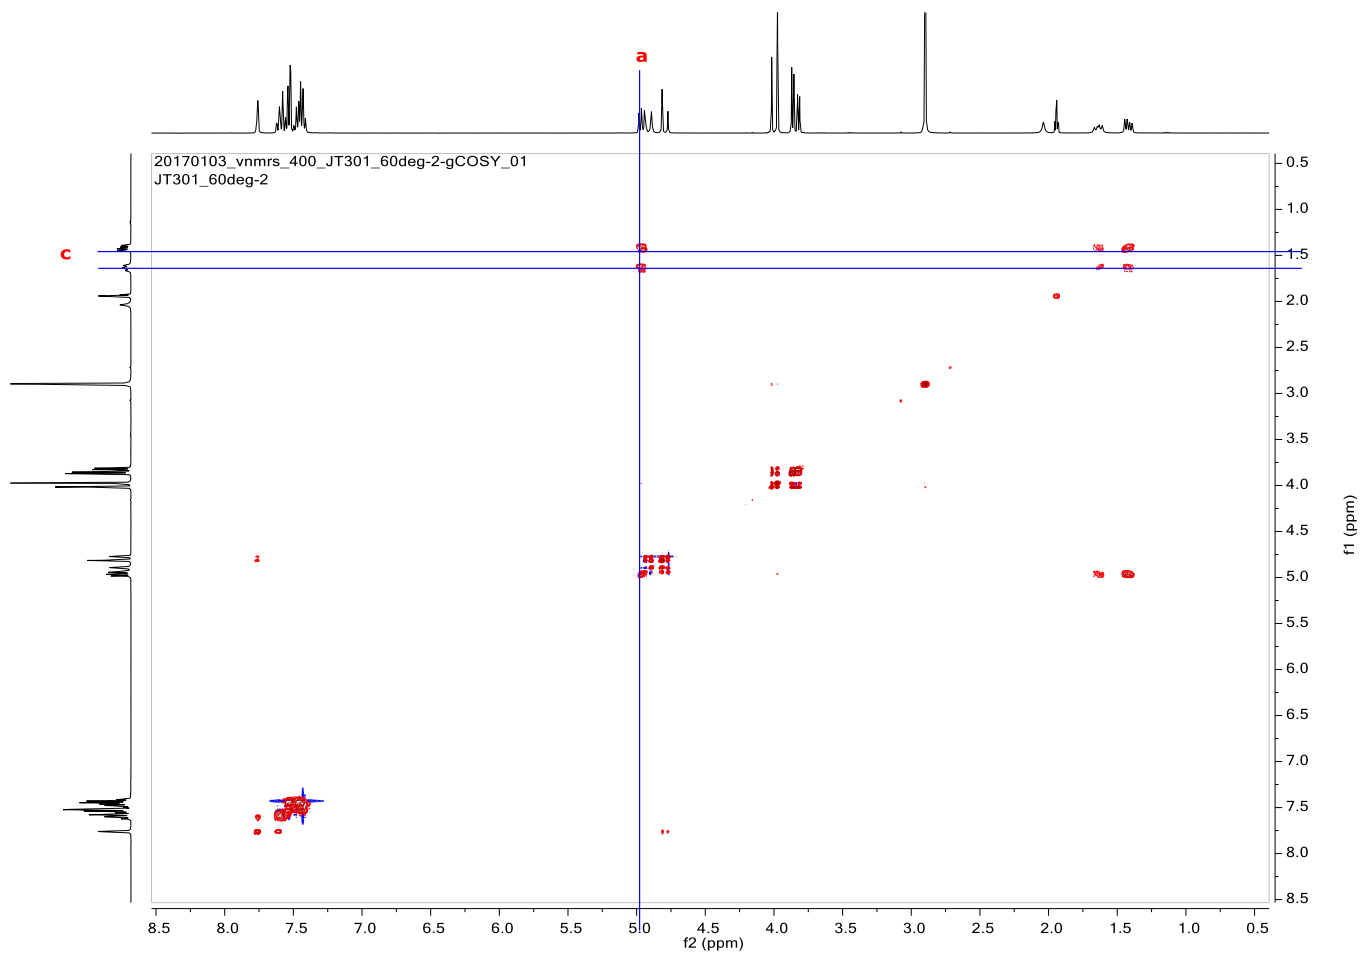

615

616

617

**Supplementary Figure 58:**  $^1\text{H}$ - $^1\text{H}$  COSY of **4i** in acetonitrile- $d_3$  at 60 °C.

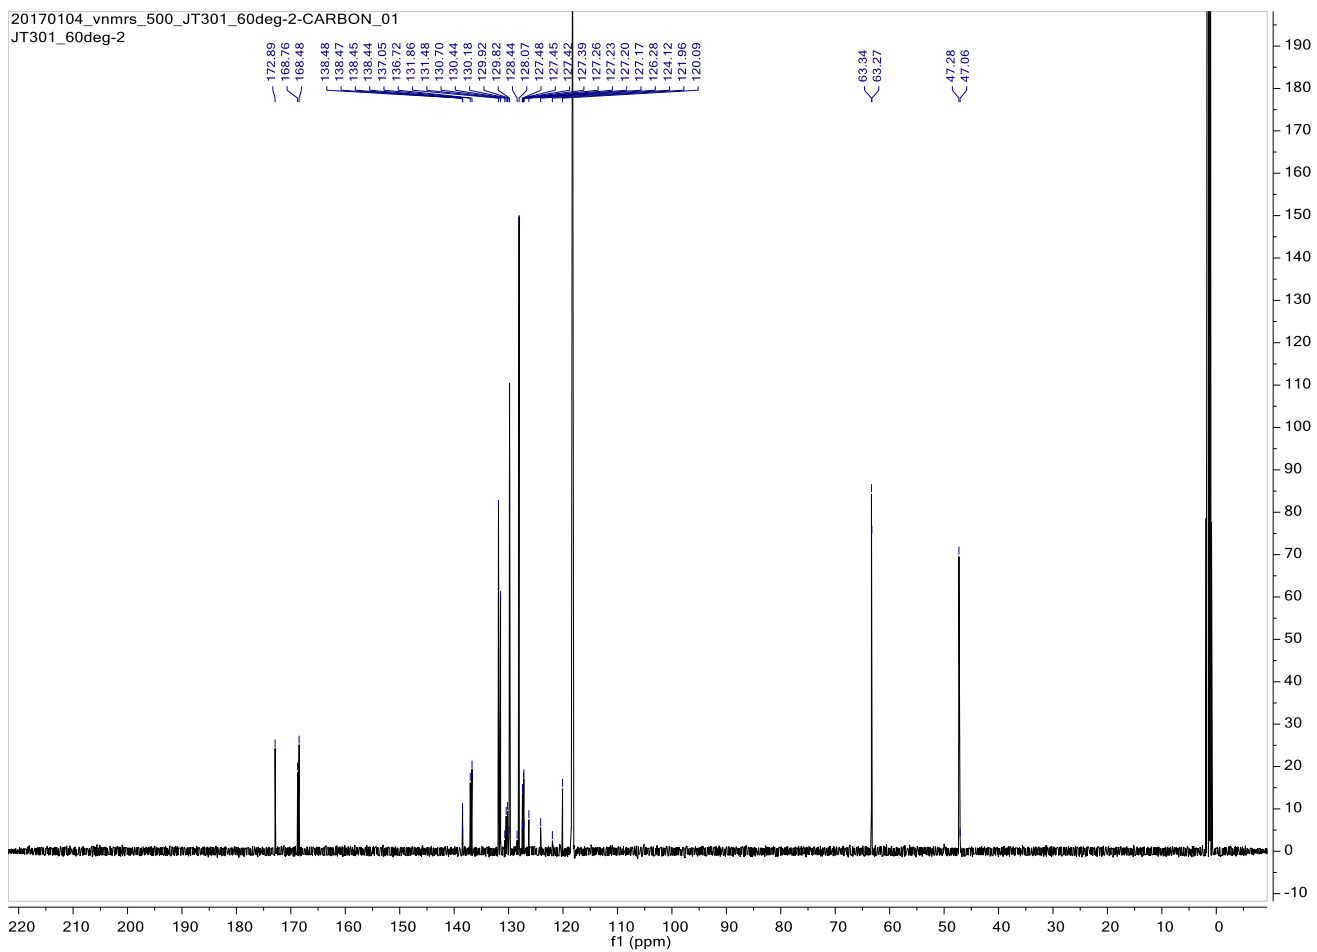

Supplementary Figure 59:  $^{13}\text{C}$  NMR of **4i** in acetonitrile- $d_3$  at 60 °C.

618

619

620

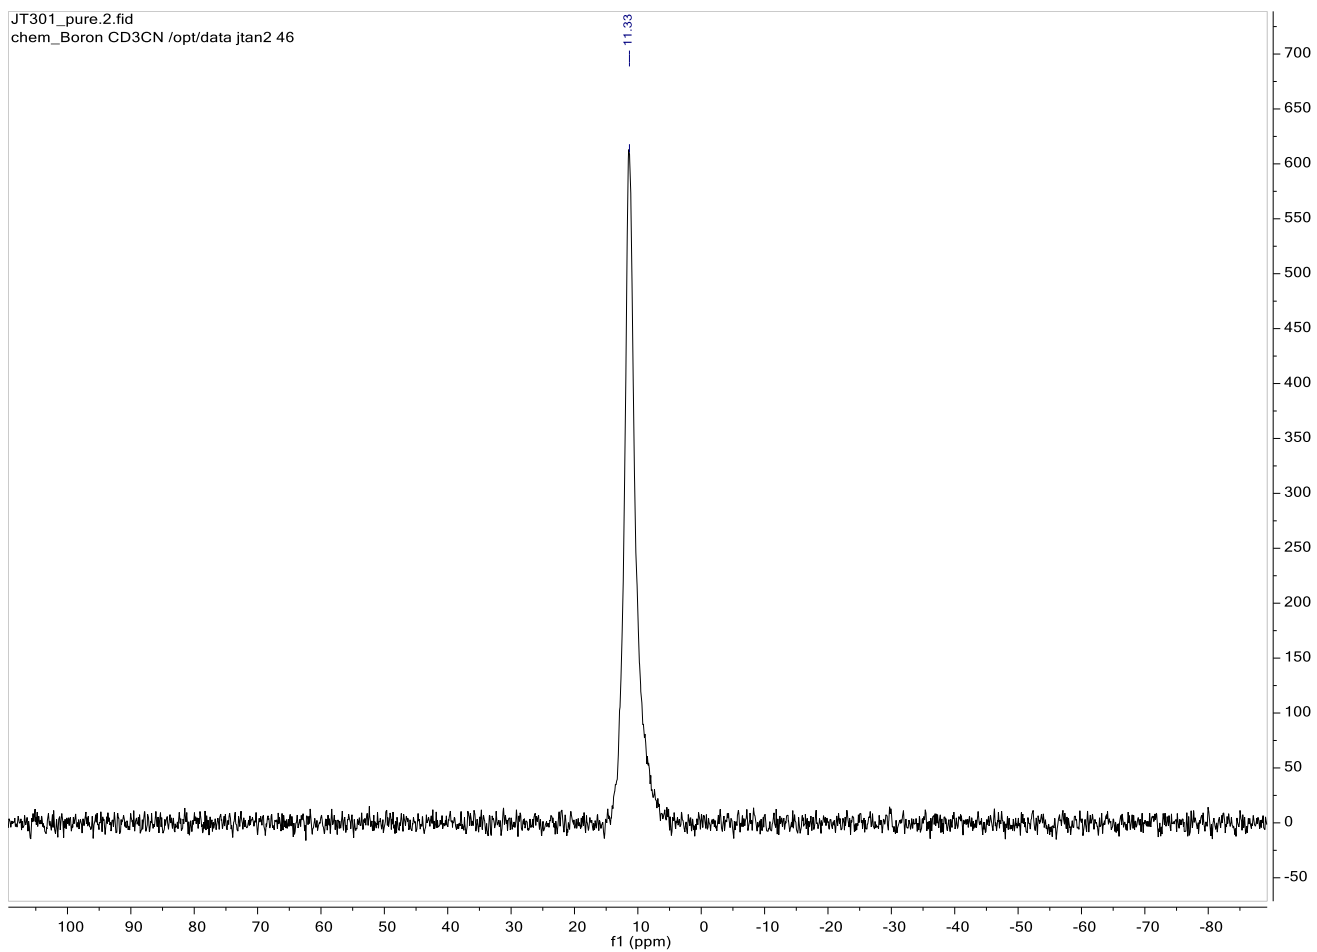

621  
622 **Supplementary Figure 60:**  $^{11}\text{B}$  NMR of **4i** in acetonitrile- $d_3$  at 25 °C.  
623

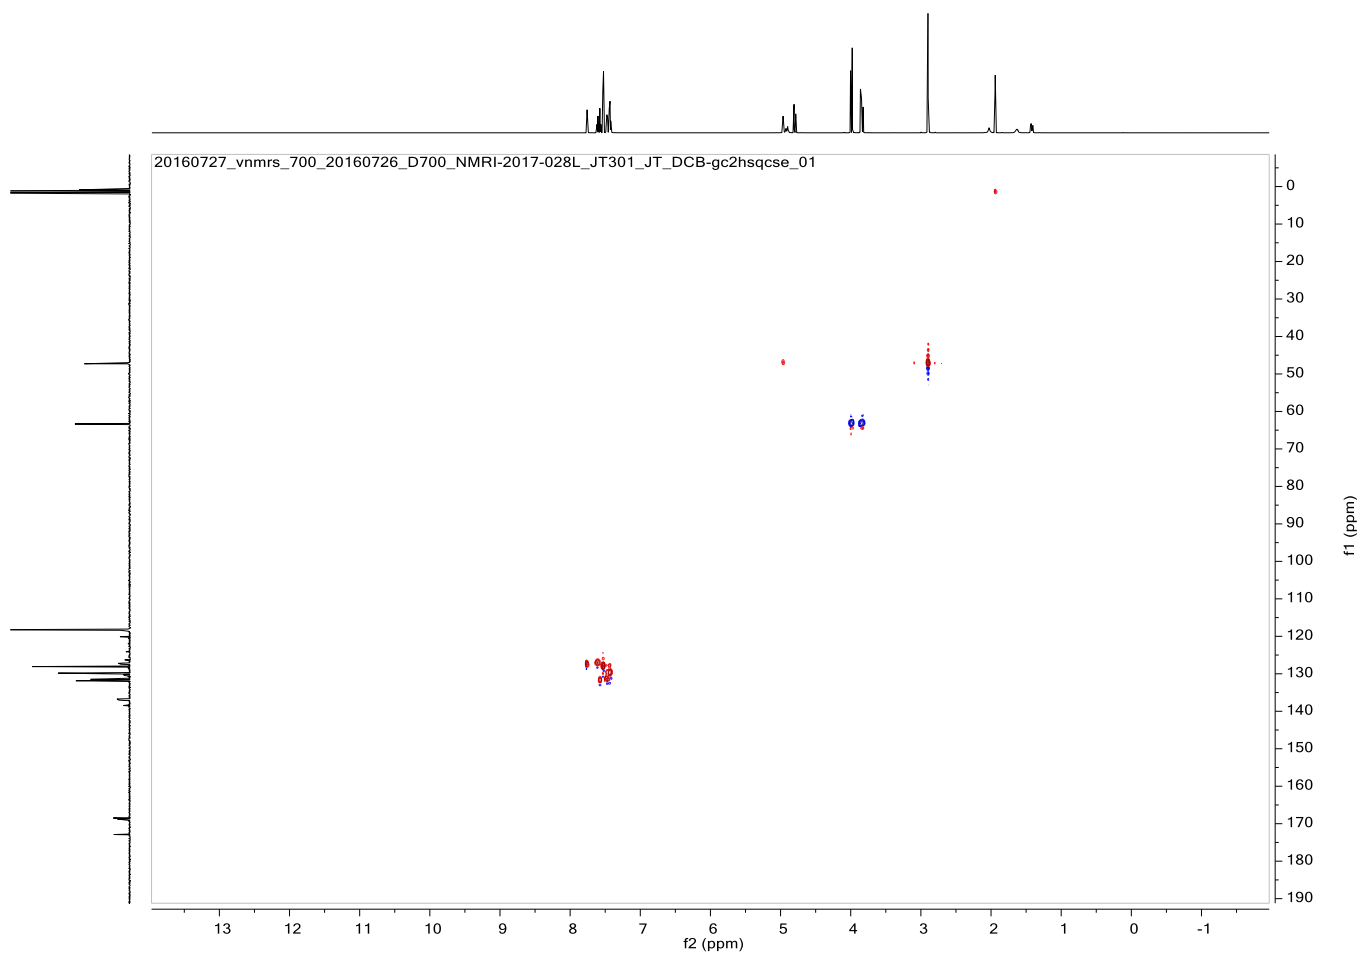

624

625

626

**Supplementary Figure 61:**  $^1\text{H}$ - $^{13}\text{C}$  HSQC NMR of **4i** in acetonitrile- $d_3$  at 60 °C.

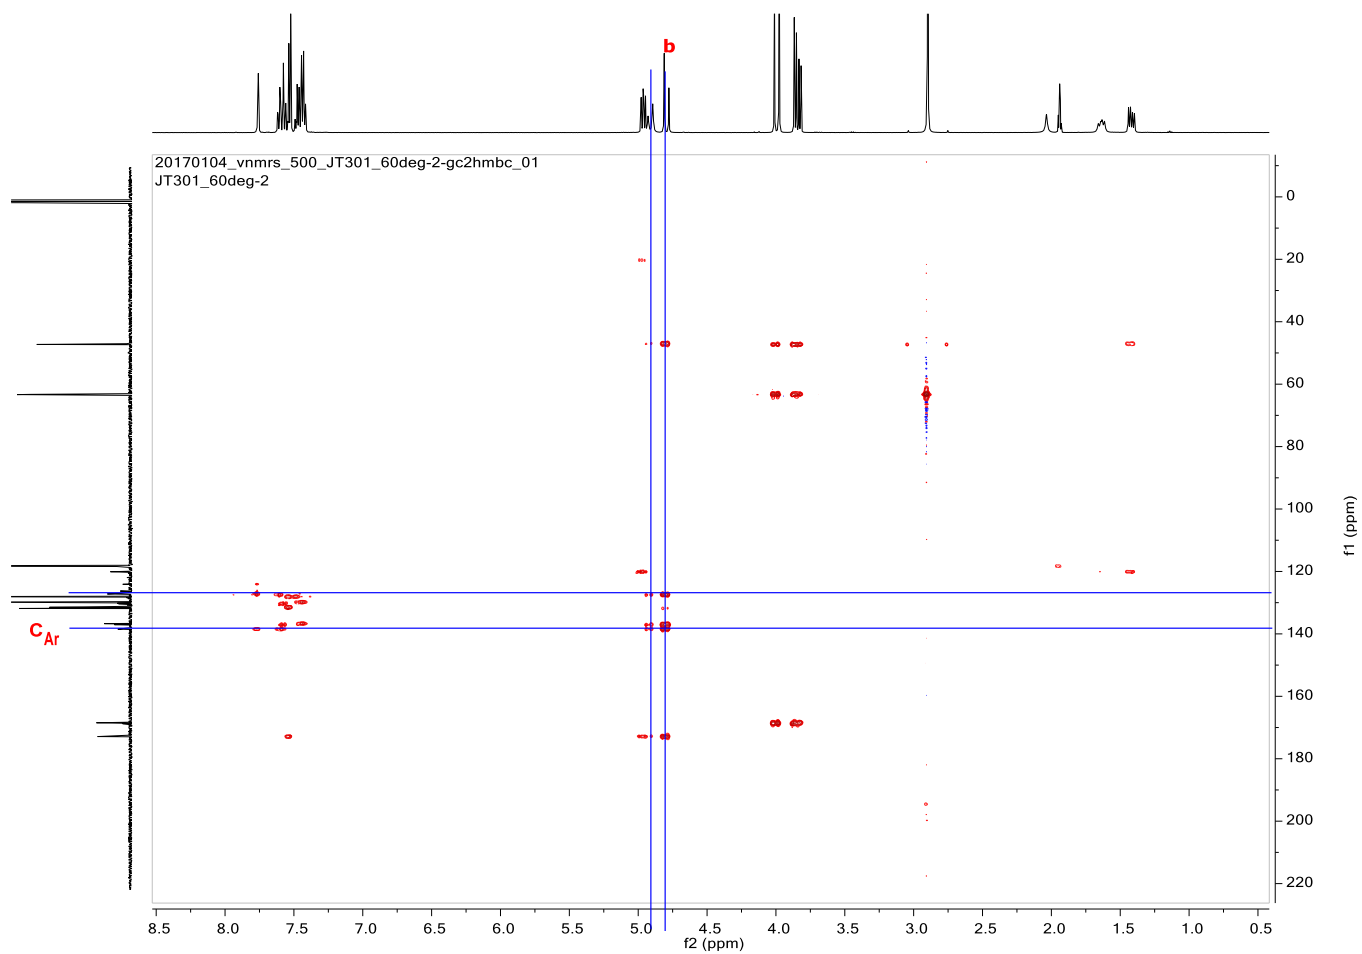

627

628

**Supplementary Figure 62:**  $^1\text{H}$ - $^{13}\text{C}$  HMBC NMR of **4i** in acetonitrile- $d_3$  at 60 °C.

629

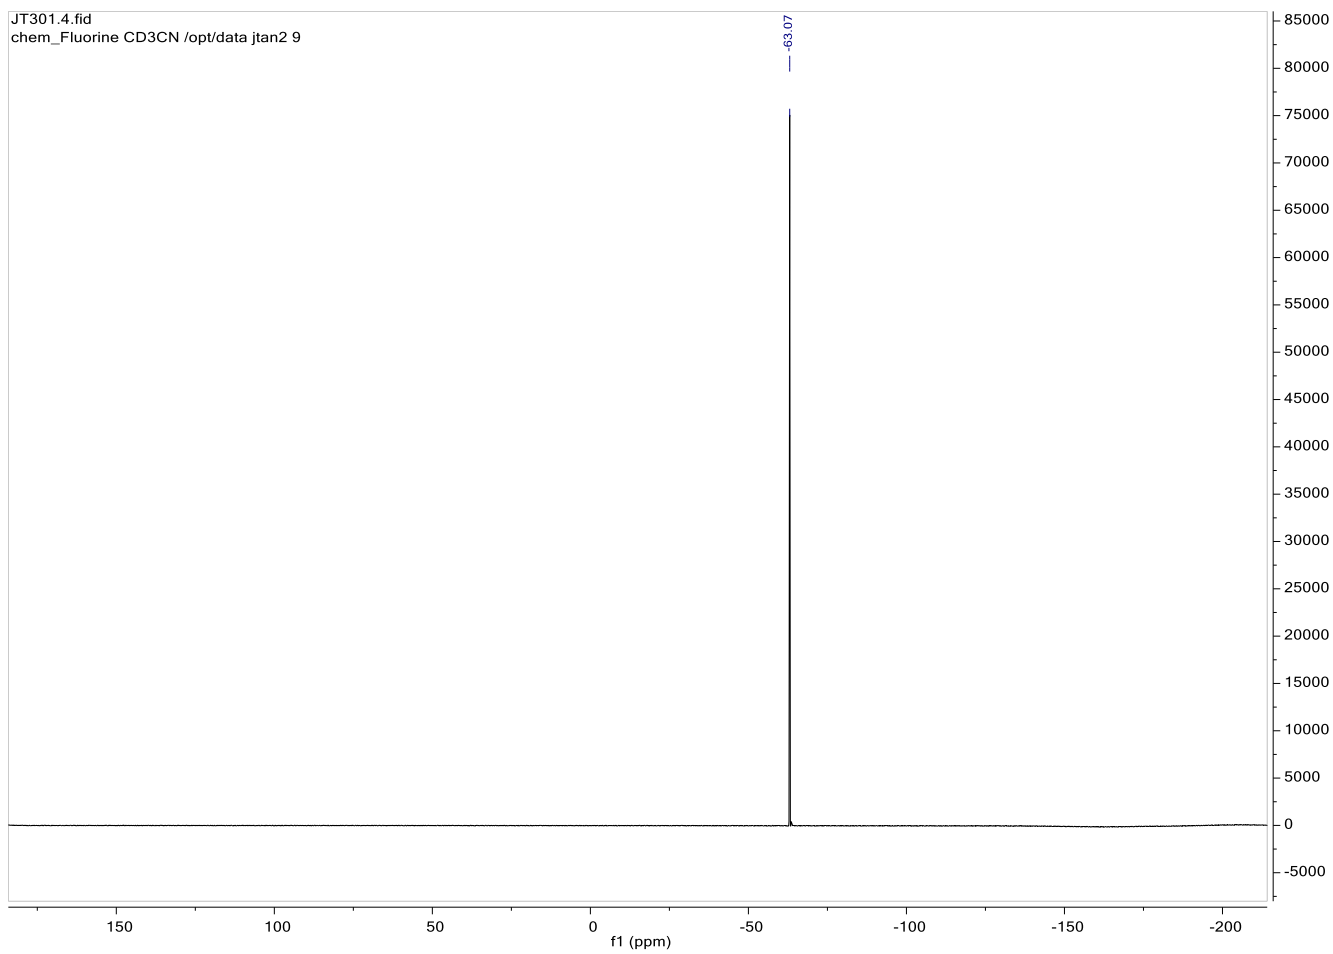

630

631

**Supplementary Figure 63:**  $^{19}\text{F}$  NMR of **4i** in acetonitrile- $d_3$  at 25 °C.





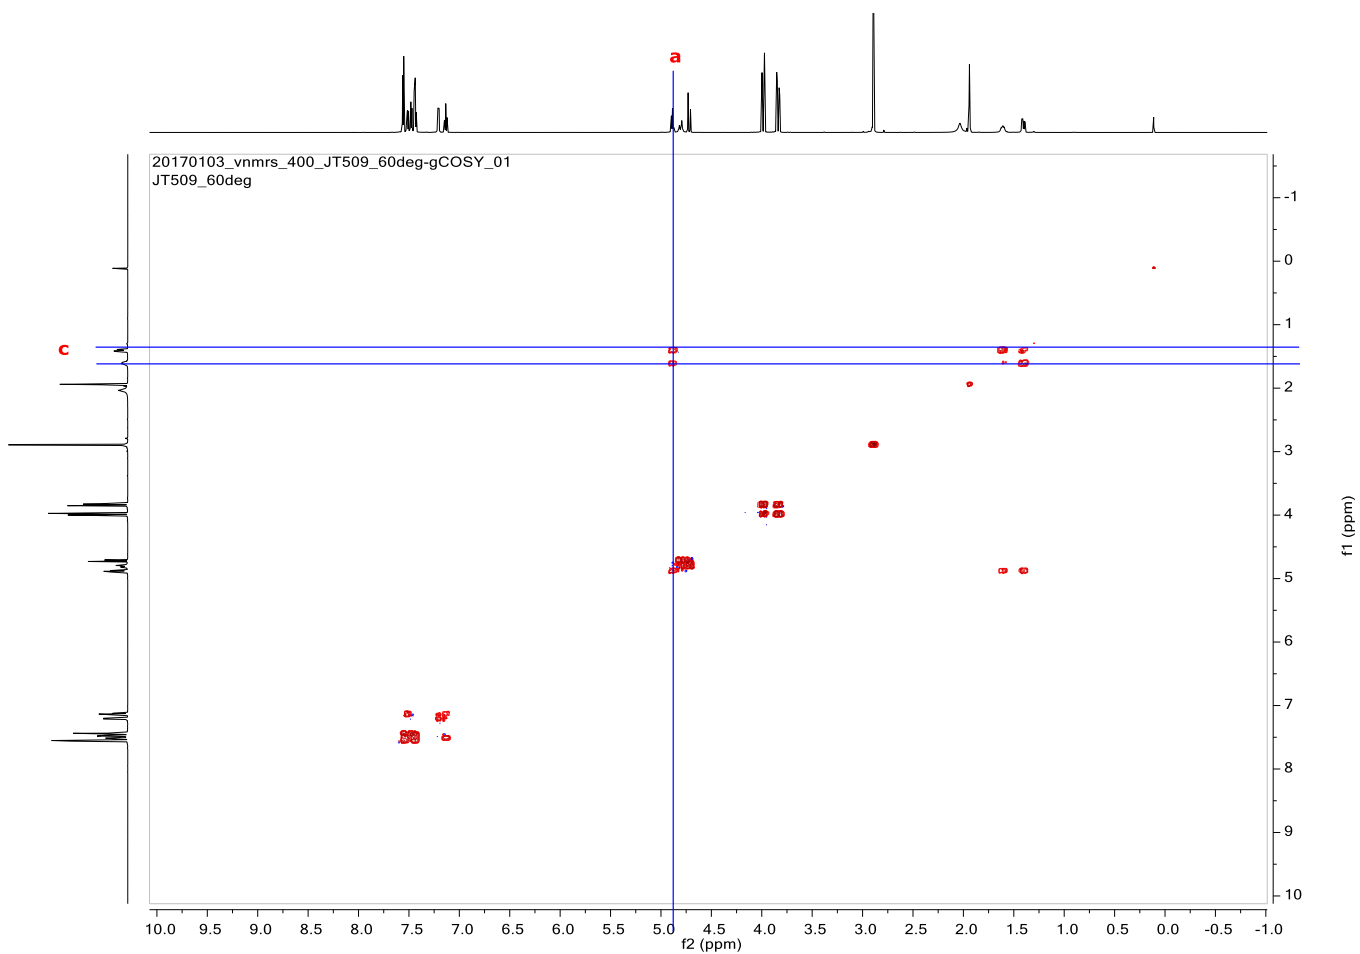

637

638

639

**Supplementary Figure 65:**  $^1\text{H}$ - $^1\text{H}$  COSY of **4j** in acetonitrile- $d_3$  at 60 °C.

20170106\_vnmrs\_500\_JT509\_60deg-DMSO-CARBON\_01  
JT509\_60deg-DMSO

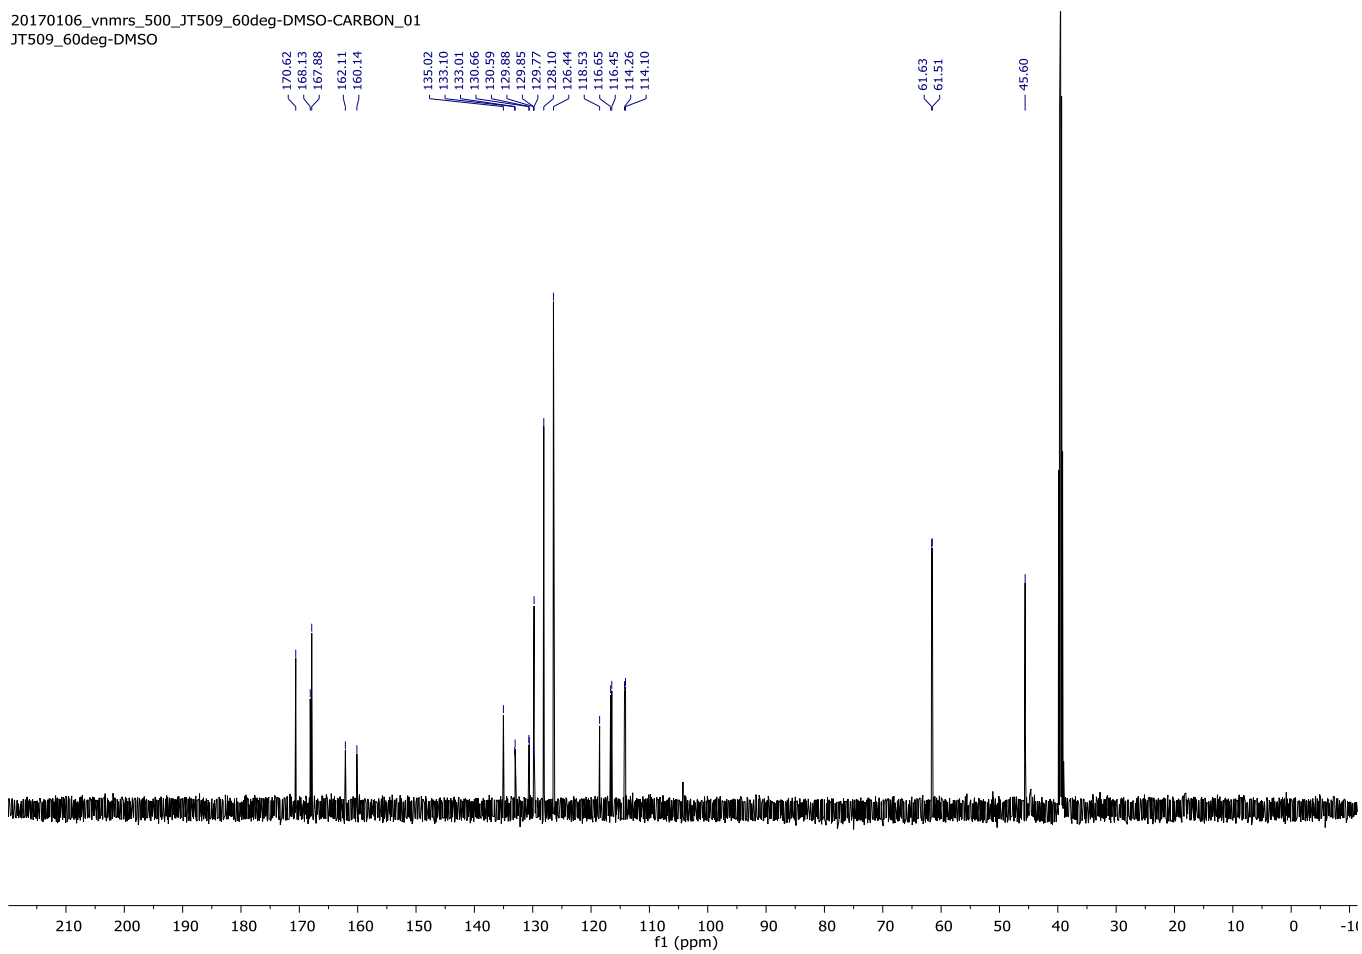

640

641

642

Supplementary Figure 66:  $^{13}\text{C}$  NMR of **4j** in dimethylsulfoxide- $d_6$  at 60 °C.

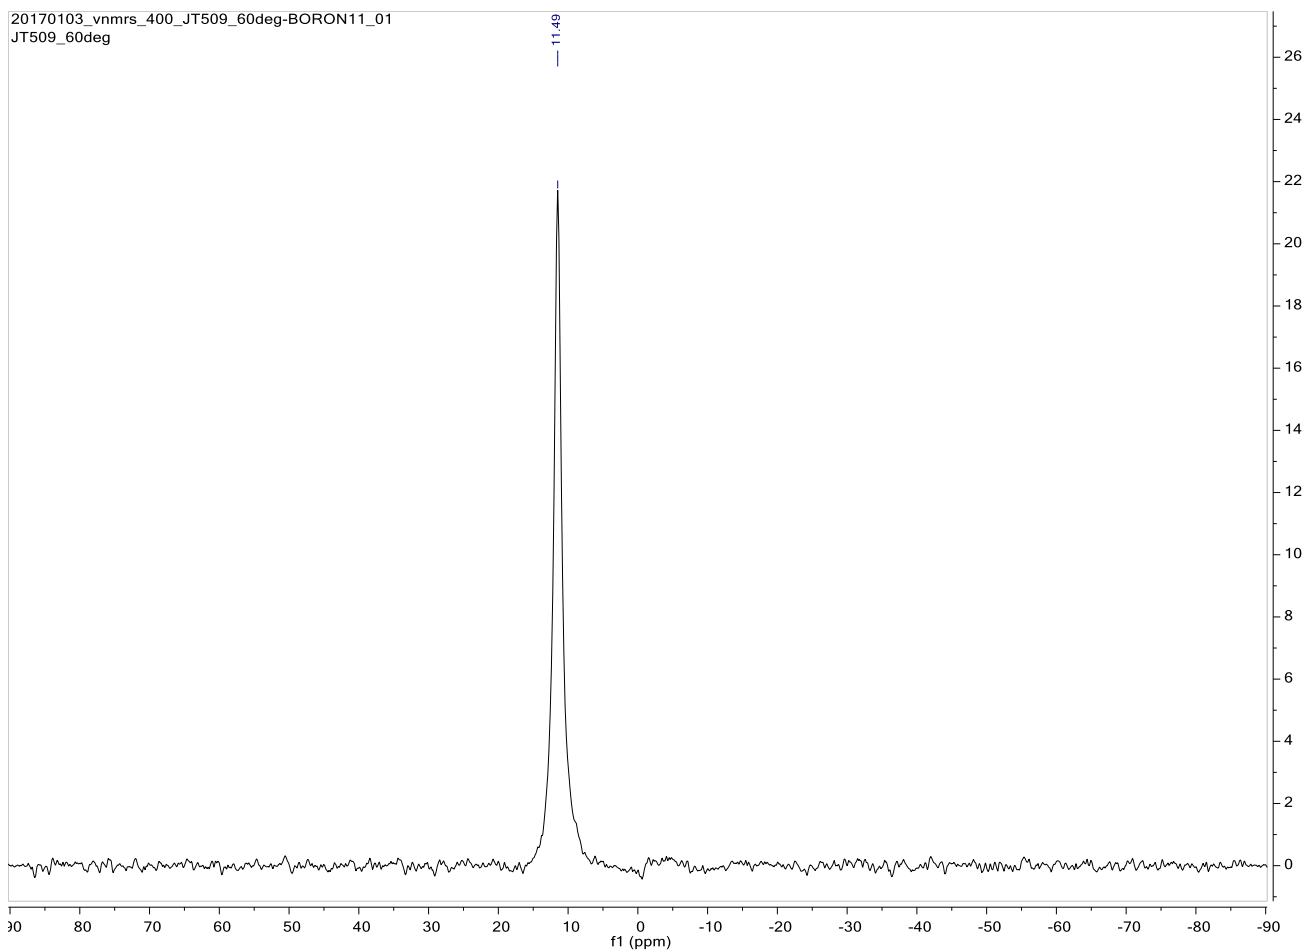

643

644

645

**Supplementary Figure 67:**  $^{11}\text{B}$  NMR of **4j** in acetonitrile- $d_3$  at 60 °C.

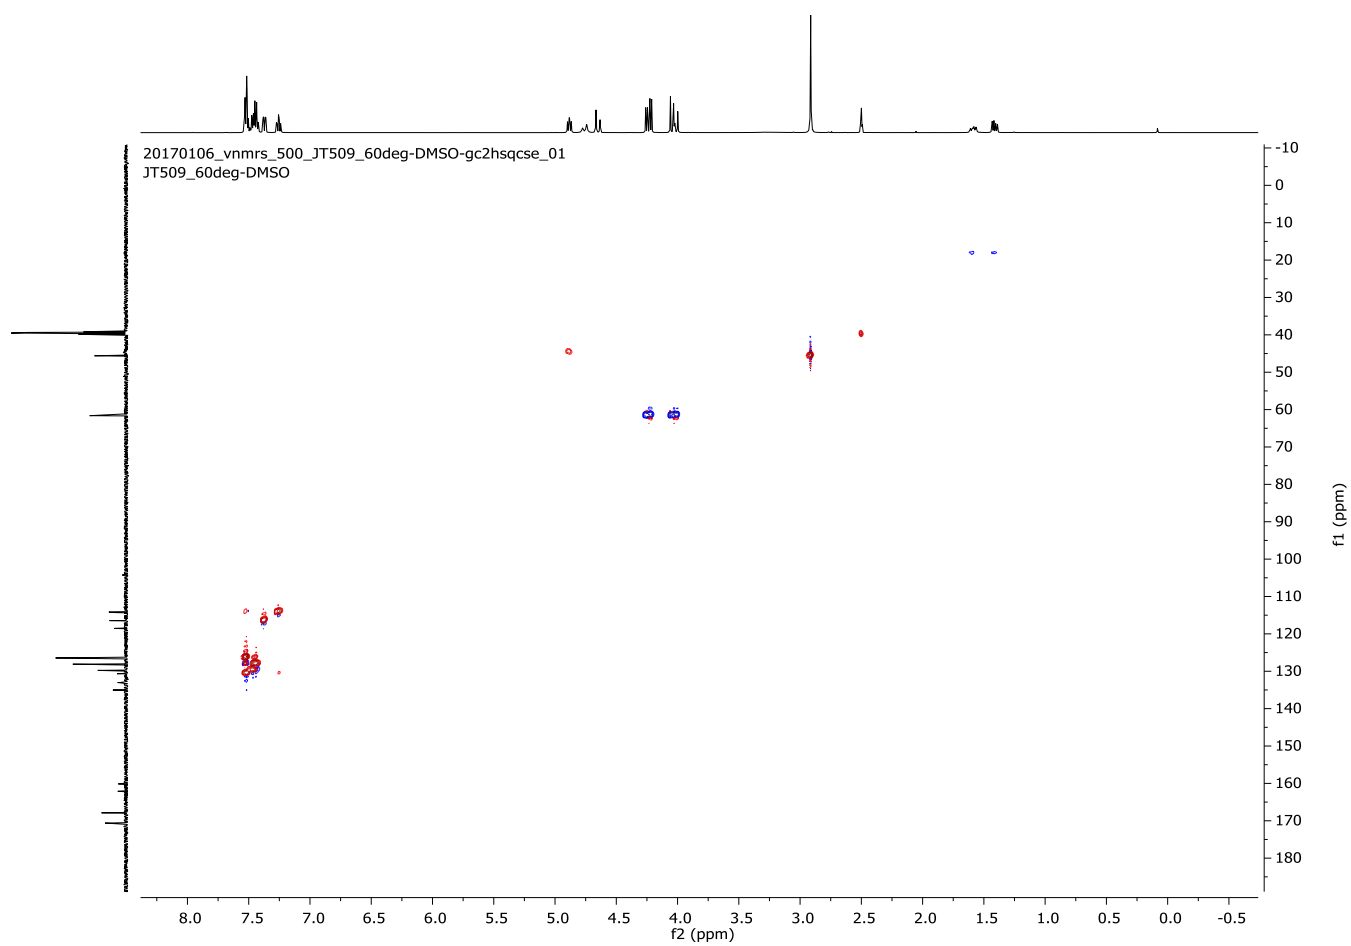

646

647

648

**Supplementary Figure 68:**  $^1\text{H}$ - $^{13}\text{C}$  HSQC NMR of **4j** in dimethylsulfoxide- $d_6$  at 60 °C.

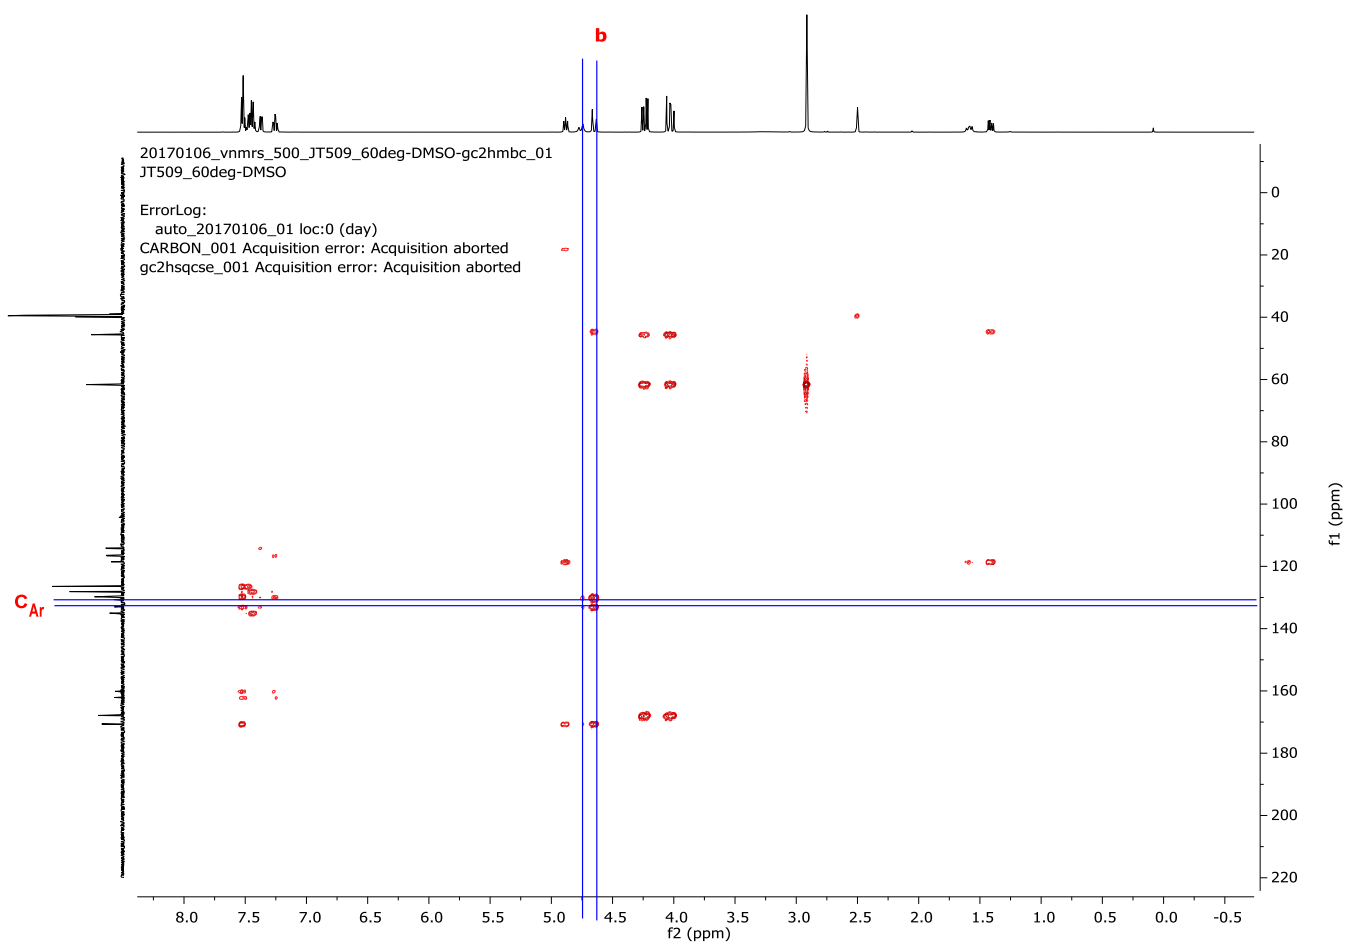

649

650

**Supplementary Figure 69:**  $^1\text{H}$ - $^{13}\text{C}$  HMBC NMR of **4j** in dimethylsulfoxide- $d_6$  at 60 °C.

651

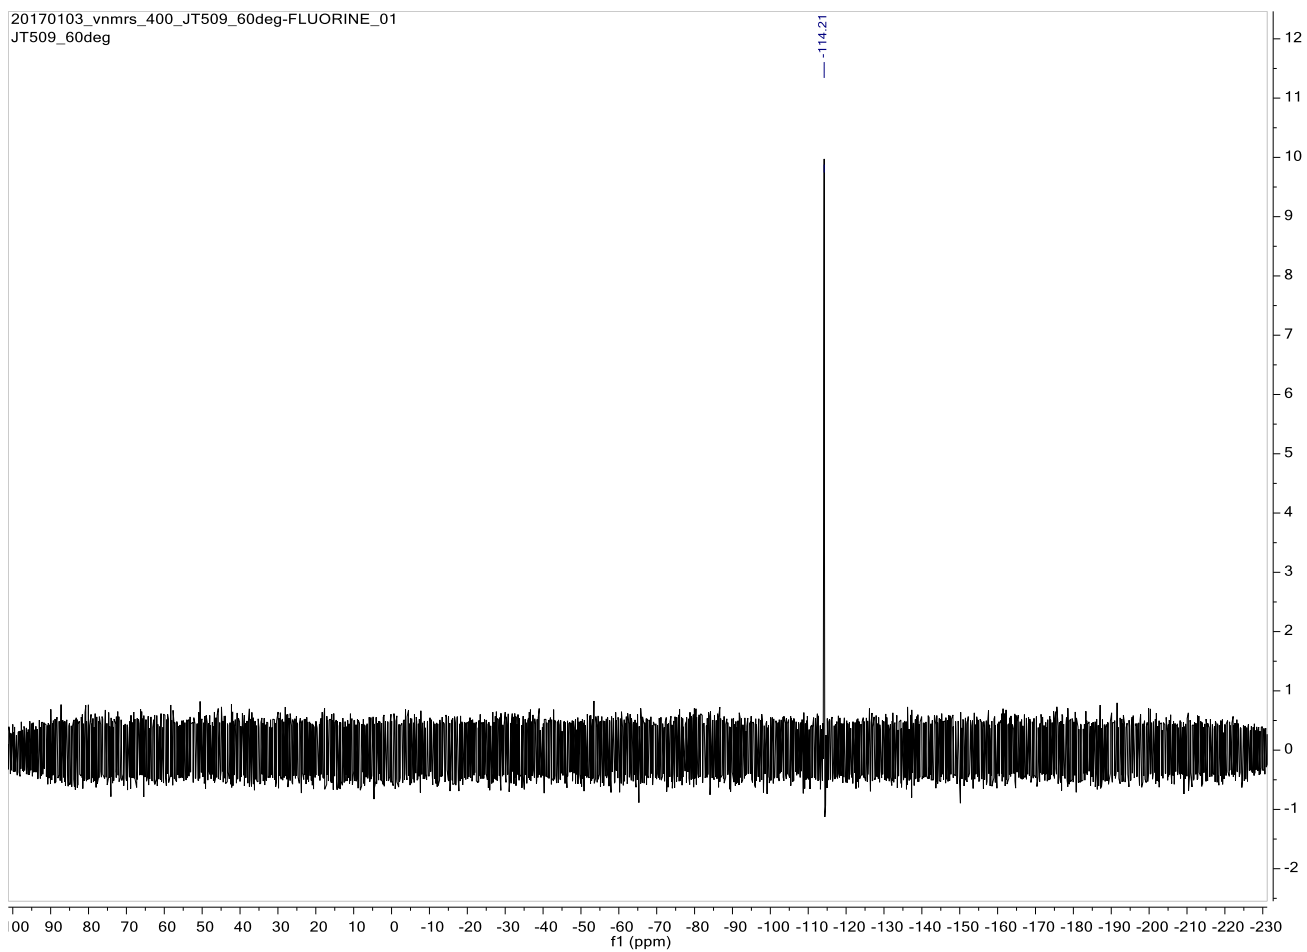

652

653

**Supplementary Figure 70:**  $^{19}\text{F}$  NMR of **4j** in acetonitrile- $d_3$  at 60 °C.

654 Compound **4k**

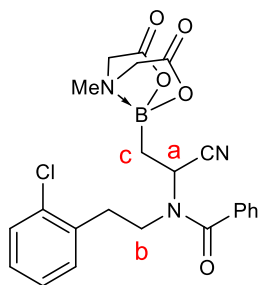

655

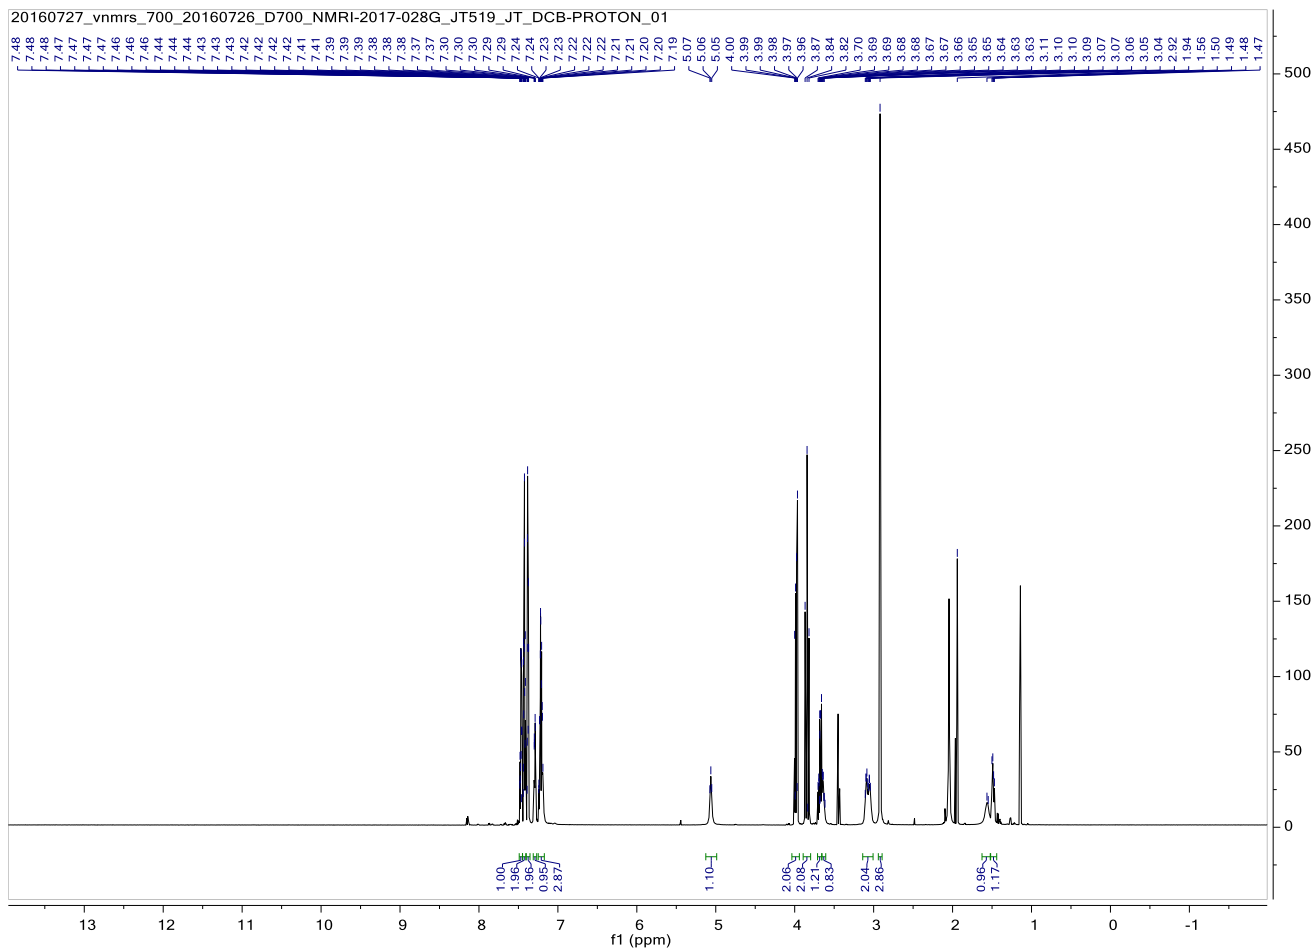

656

657

658

Supplementary Figure 71:  $^1\text{H}$  NMR of **4k** in acetonitrile- $d_3$  at 60 °C.

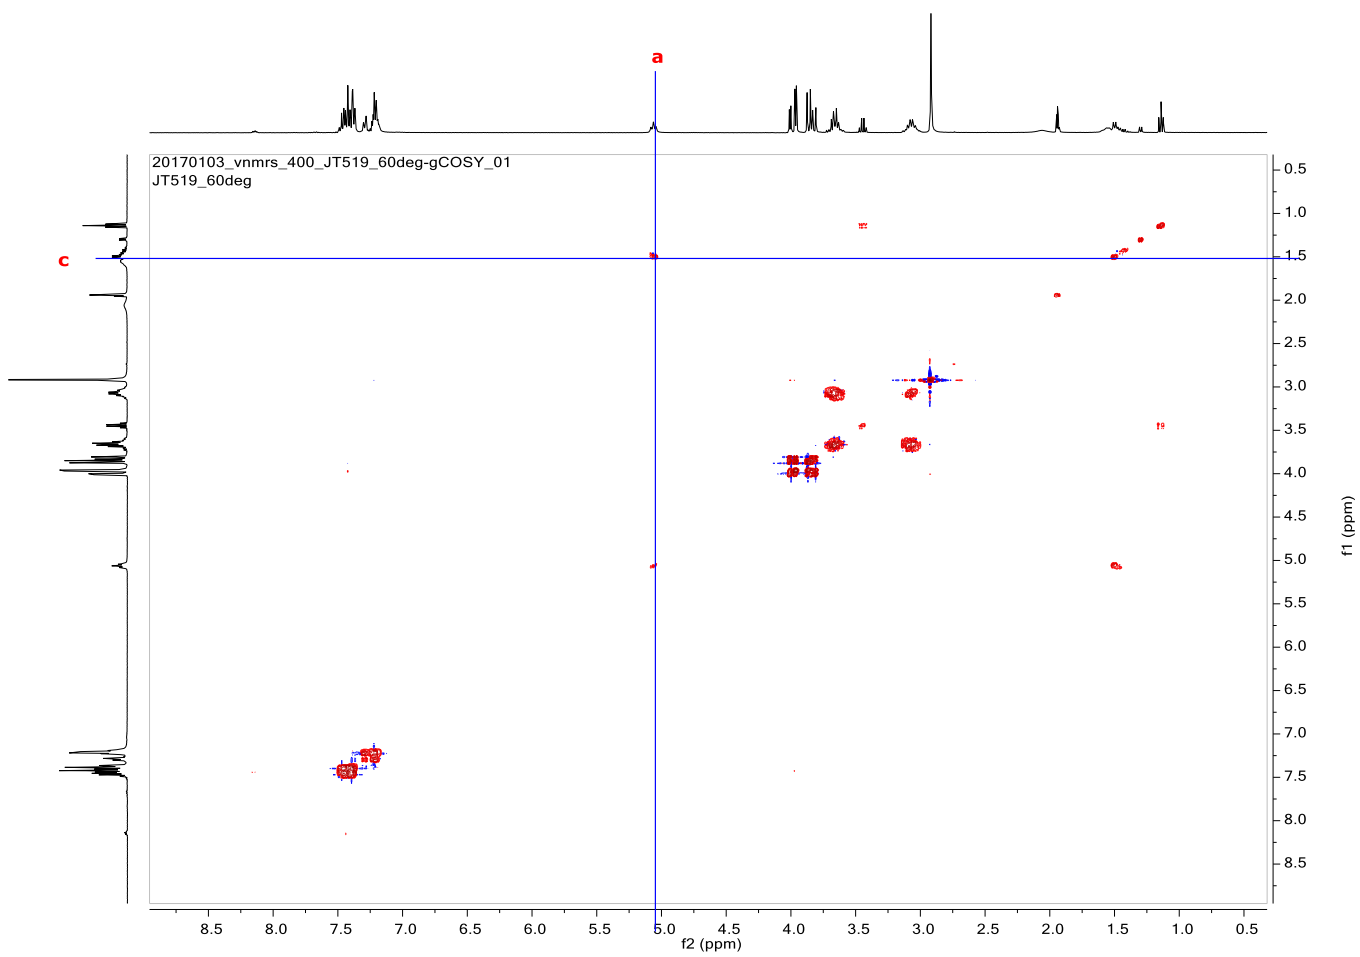

659

660

661

**Supplementary Figure 72:**  $^1\text{H}$ - $^1\text{H}$  COSY of **4k** in acetonitrile- $d_3$  at 60 °C.



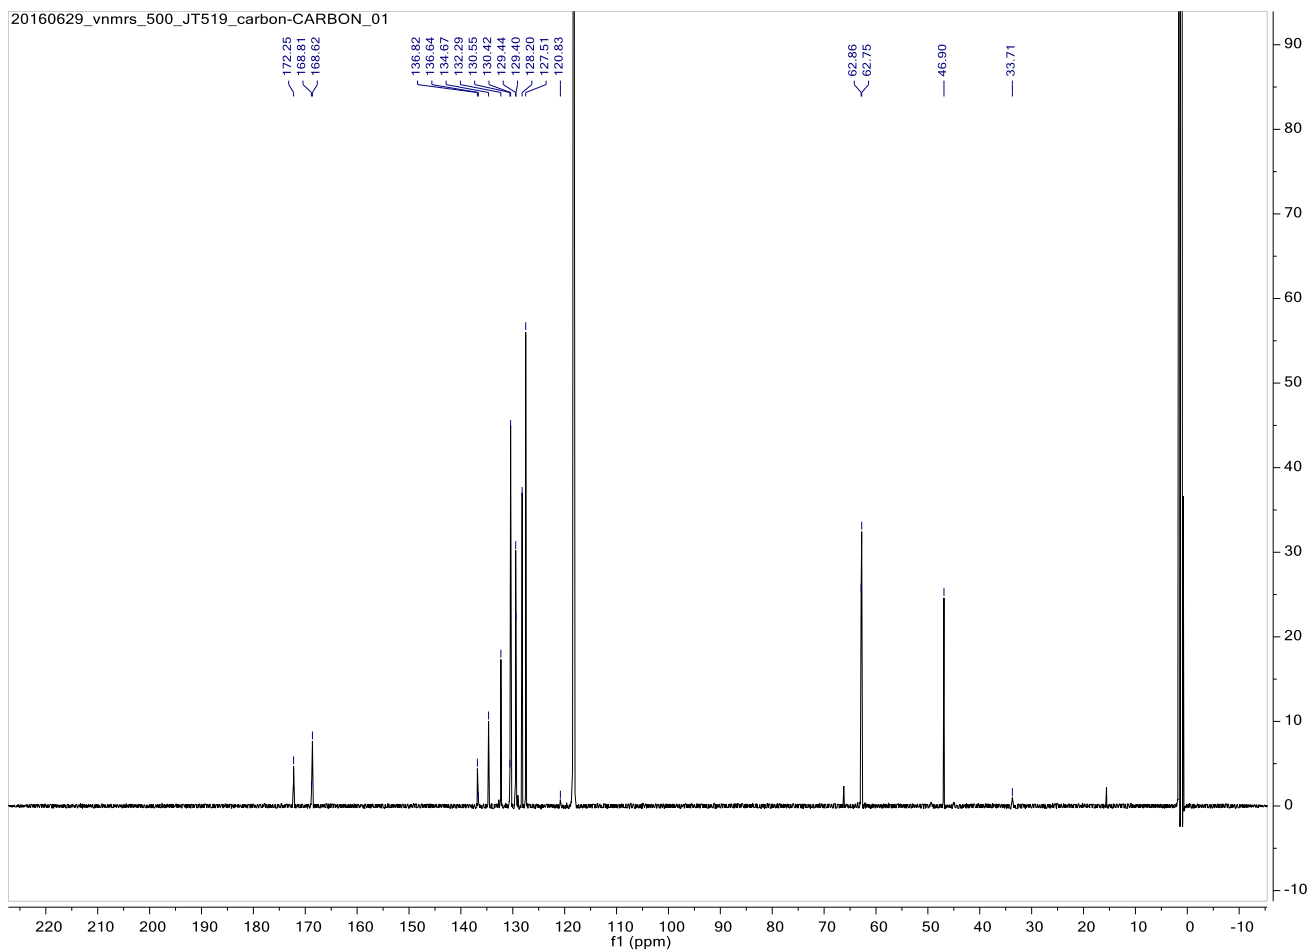

Supplementary Figure 73:  $^{13}\text{C}$  NMR of **4k** in acetonitrile- $d_3$  at 25 °C.

662

663

664

665

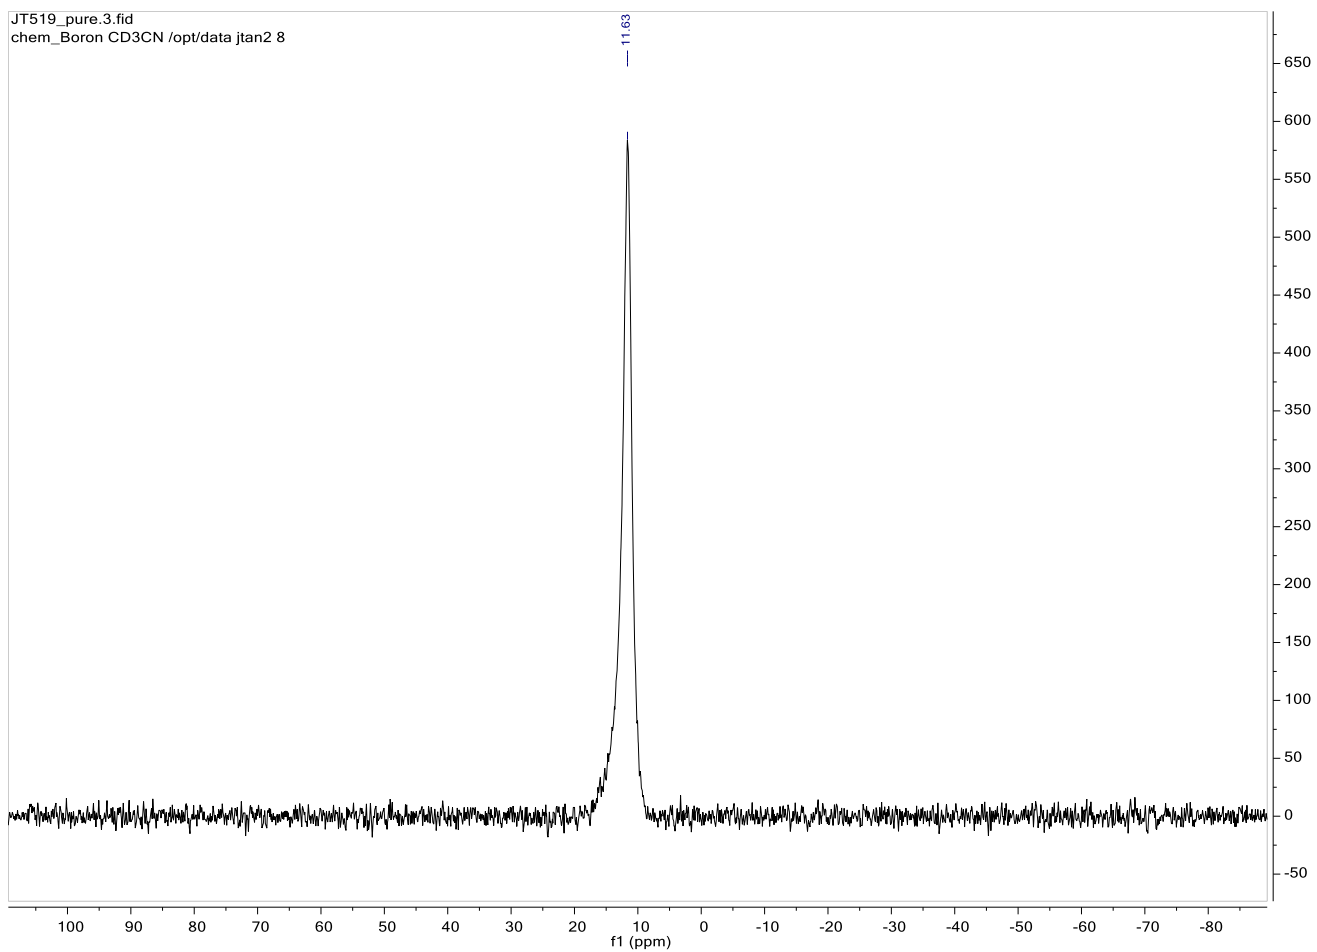

666

667

668

**Supplementary Figure 74:**  $^{11}\text{B}$  NMR of **4k** in acetonitrile- $d_3$  at 25 °C.

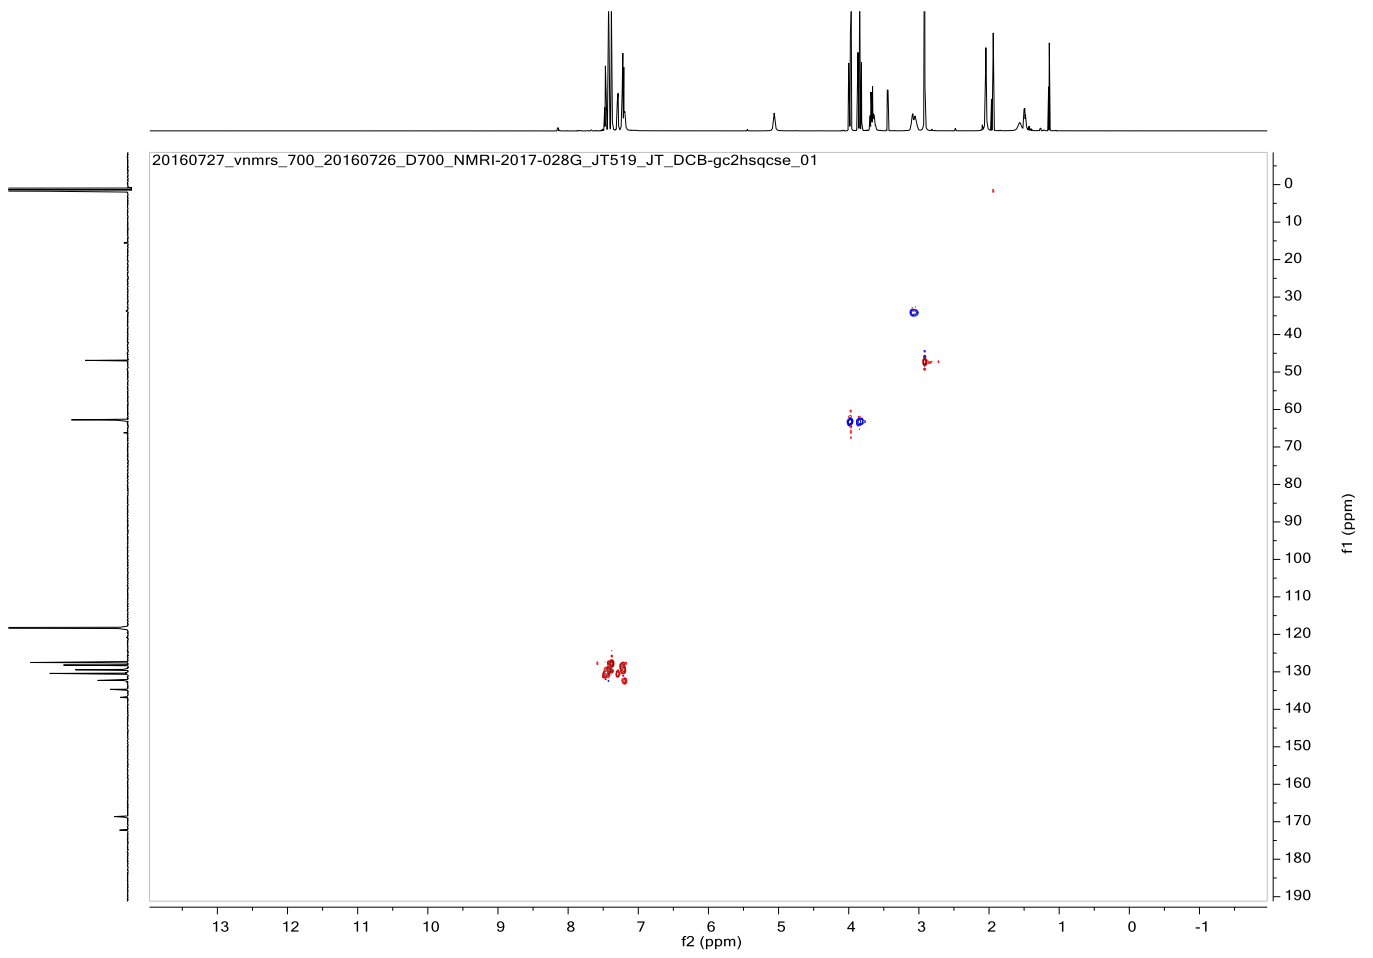

669

670

**Supplementary Figure 75:**  $^1\text{H}$ - $^{13}\text{C}$  HSQC NMR of **4k** in acetonitrile- $d_3$  at 60 °C.

671 Compound **4I**

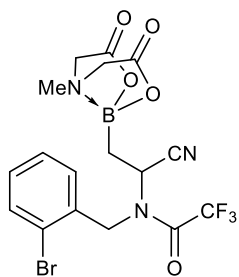

672

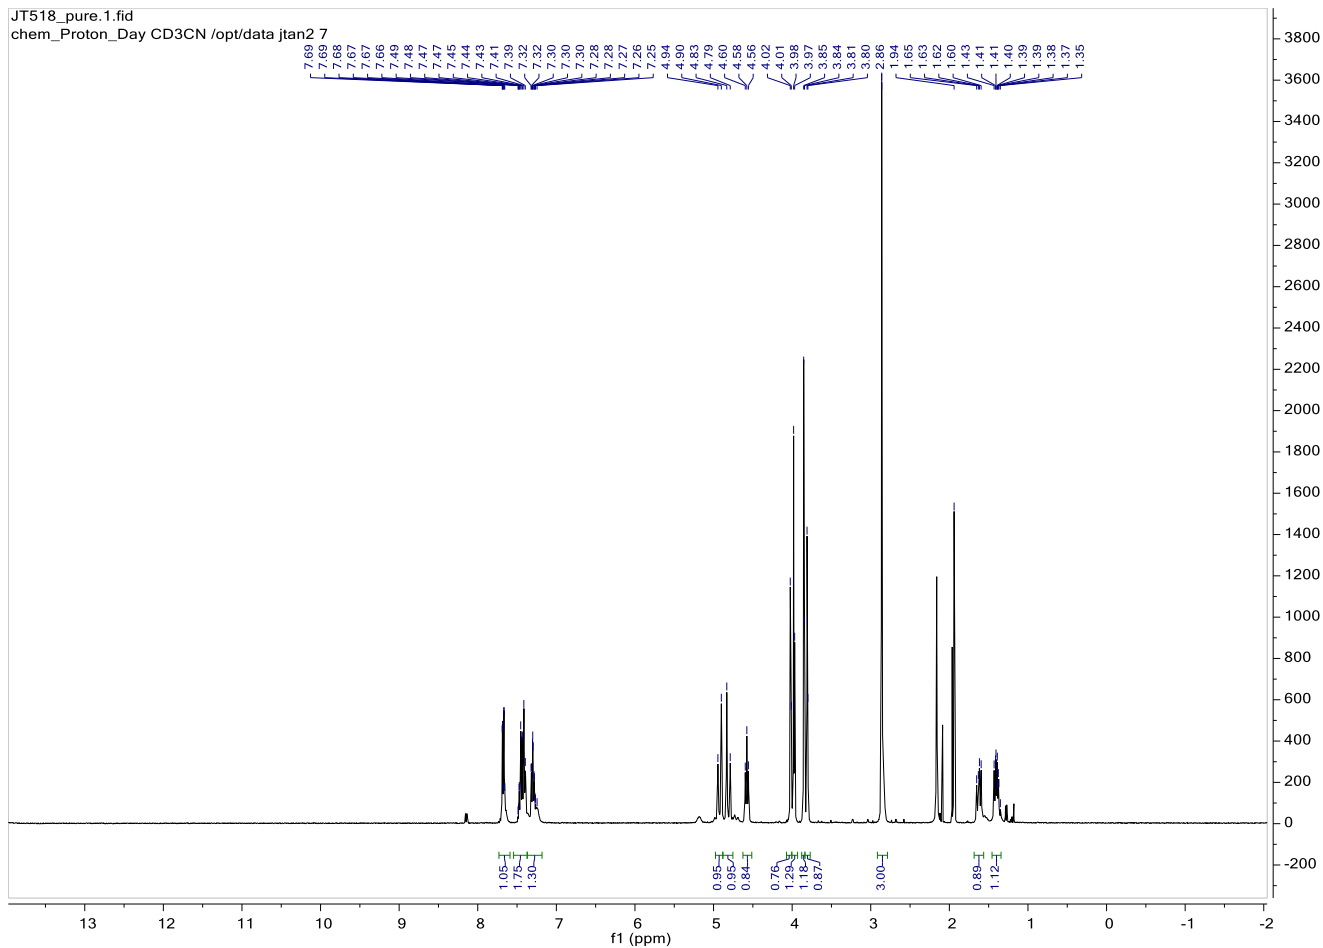

673

674

675

Supplementary Figure 76:  $^1\text{H}$  NMR of **4I** in acetonitrile- $d_3$  at 25 °C.

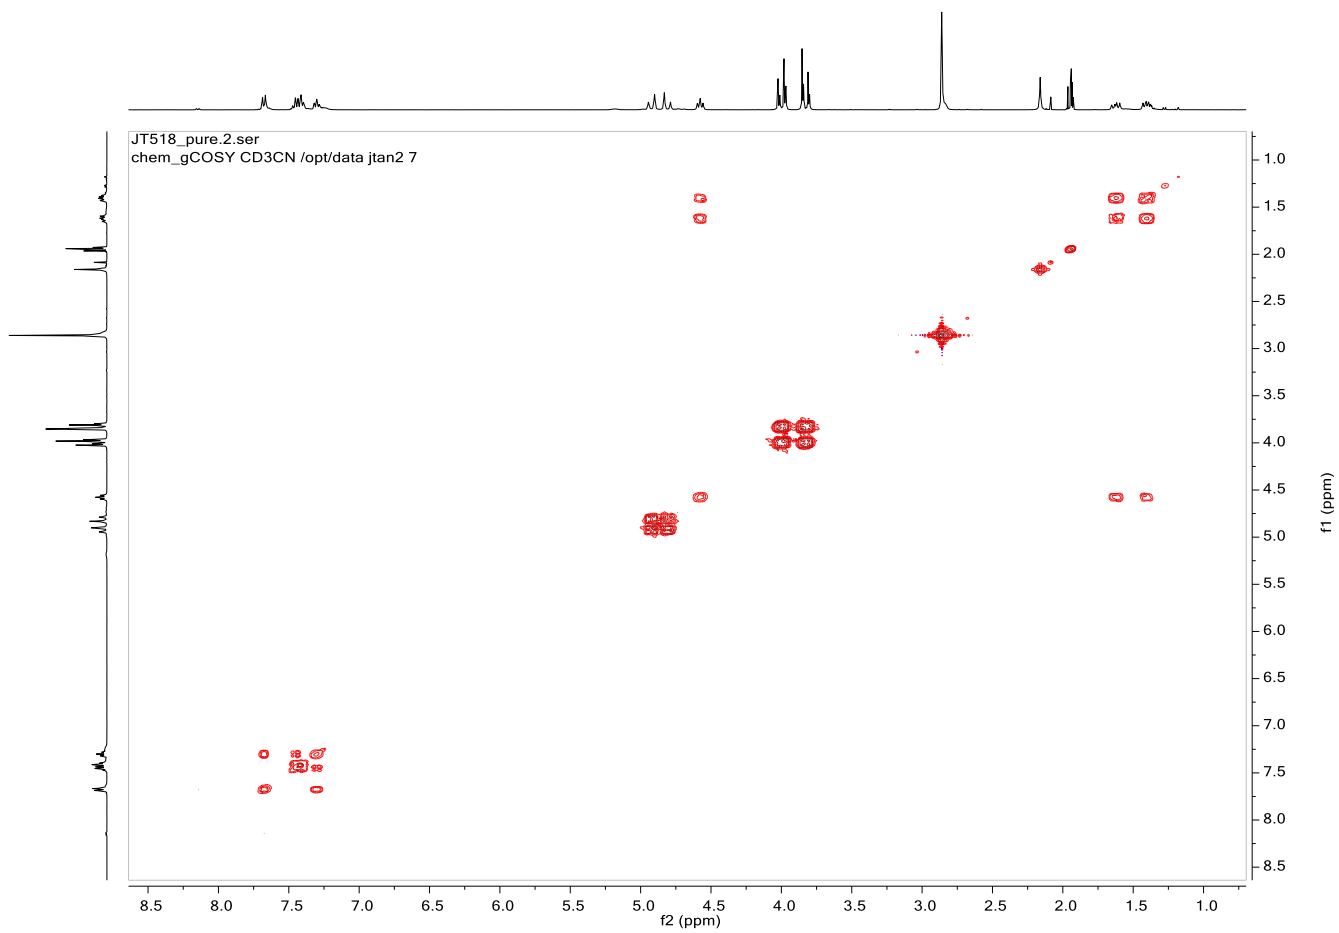

676

677

678

**Supplementary Figure 77:**  $^1\text{H}$ - $^1\text{H}$  COSY of **4l** in acetonitrile- $d_3$  at 25 °C.

20170105\_nmrs\_500\_JT268-rt\_acetone-CARBON\_01  
JT268-rt\_acetone

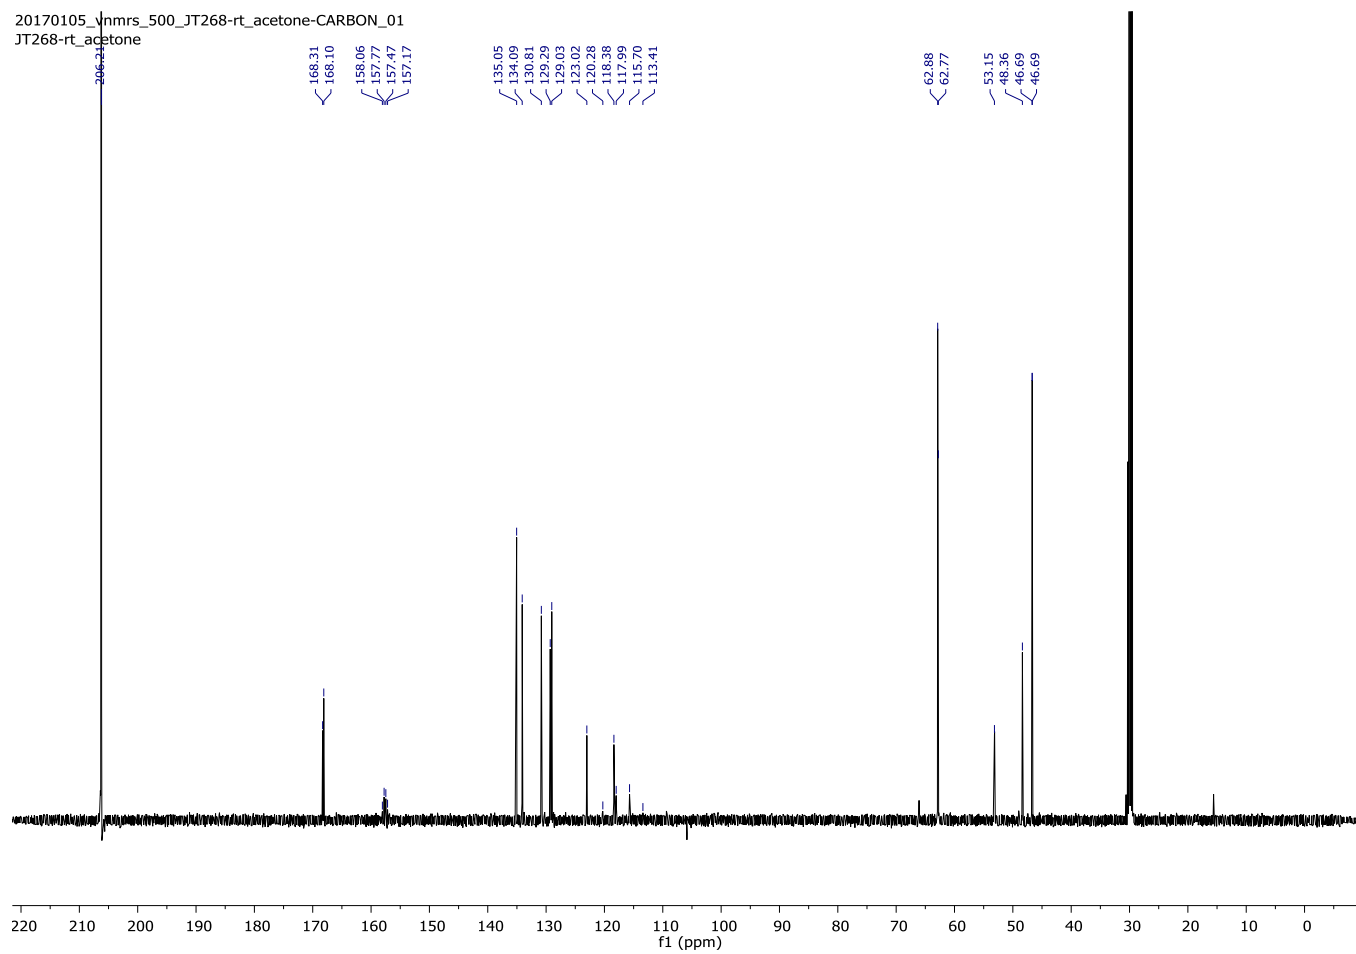

679

680

681

Supplementary Figure 78: <sup>13</sup>C NMR of 4l in acetone-d<sub>6</sub> at 25 °C.

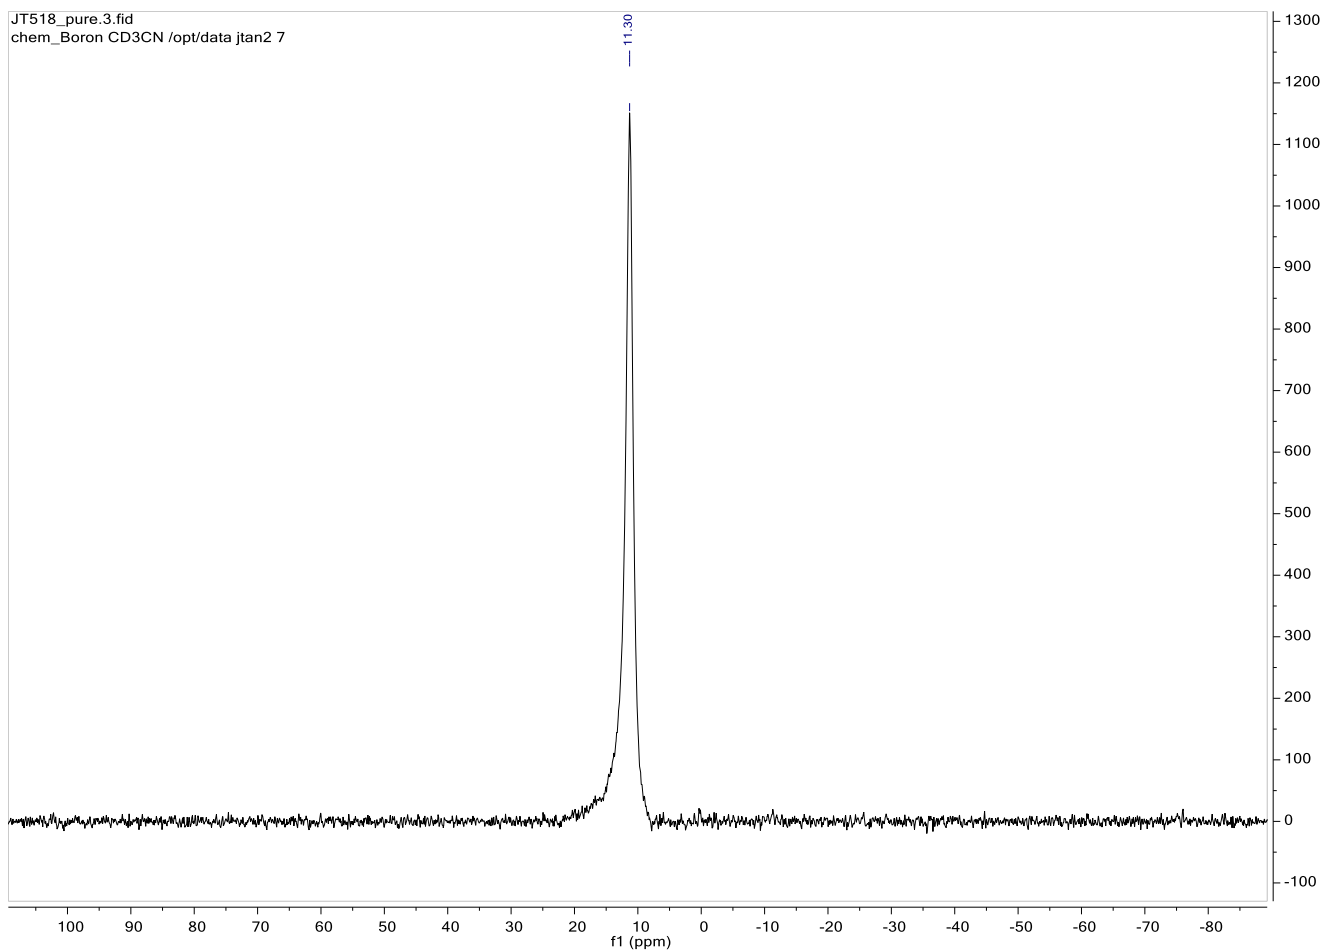

682  
683 **Supplementary Figure 79:**  $^{11}\text{B}$  NMR of **4I** in acetonitrile- $d_3$  at 25 °C.  
684

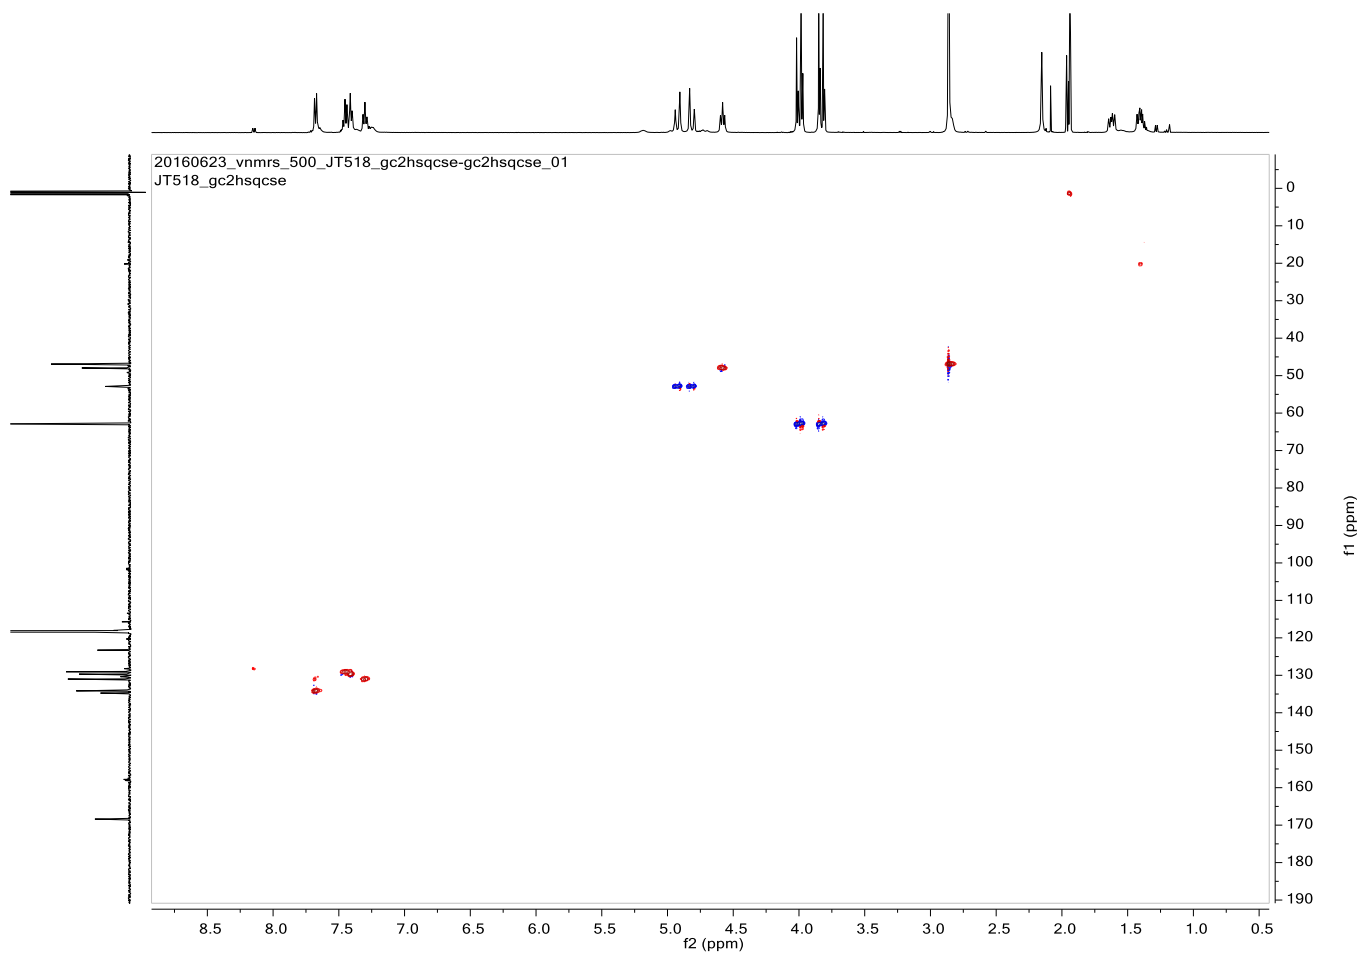

685

686

687

**Supplementary Figure 80:**  $^1\text{H}$ - $^{13}\text{C}$  HSQC NMR of **41** in acetonitrile- $d_3$  at 25 °C.



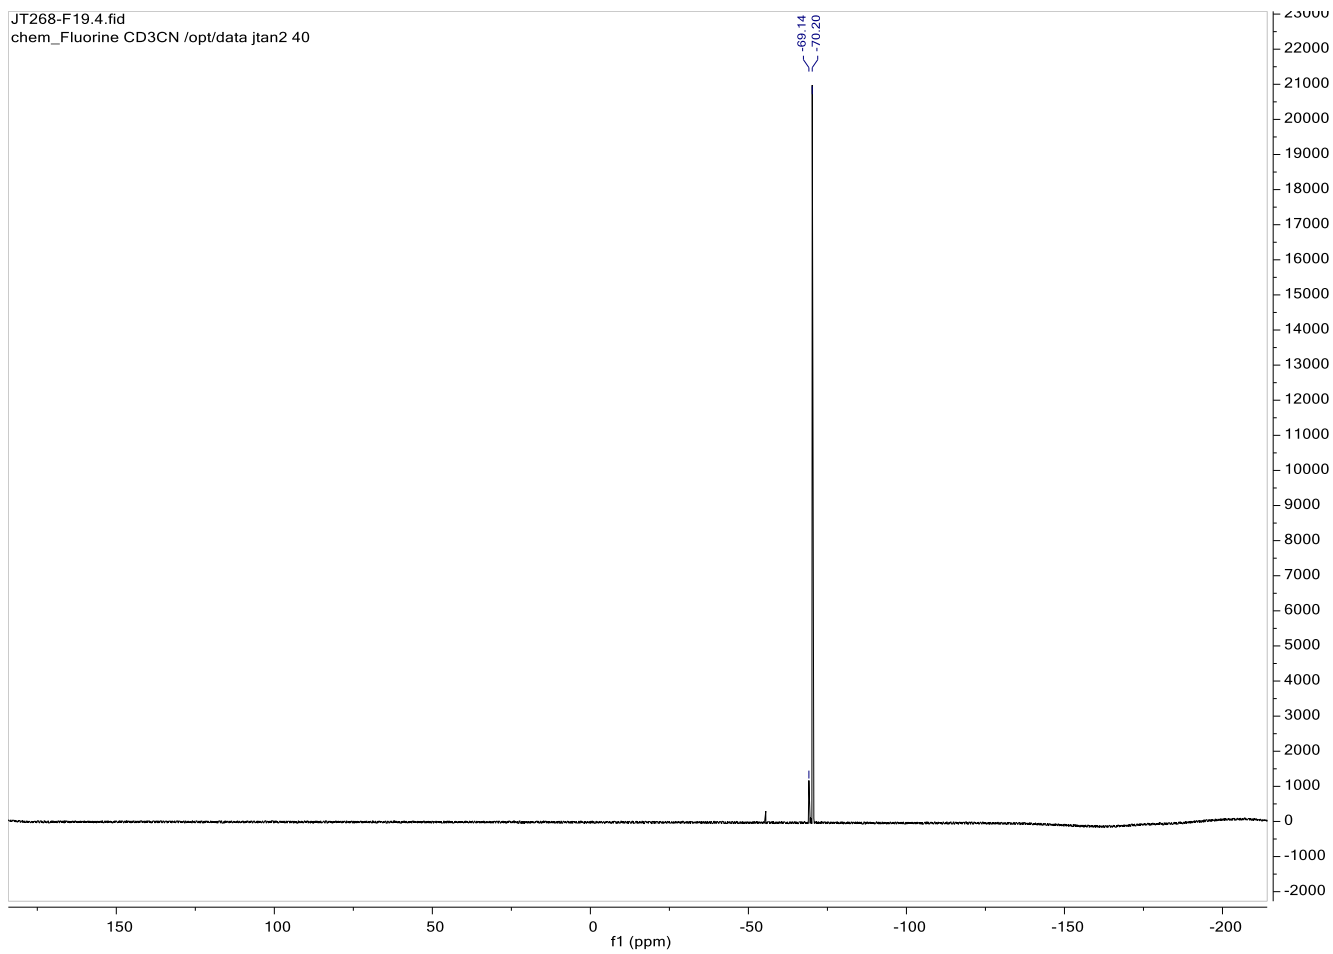

688

689

**Supplementary Figure 81:**  $^{19}\text{F}$  NMR of **4I** in acetonitrile- $d_3$  at 25 °C.

690 Compound **7a**

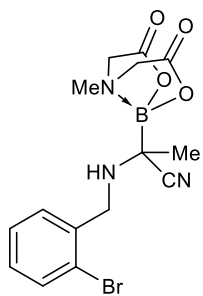

691

692

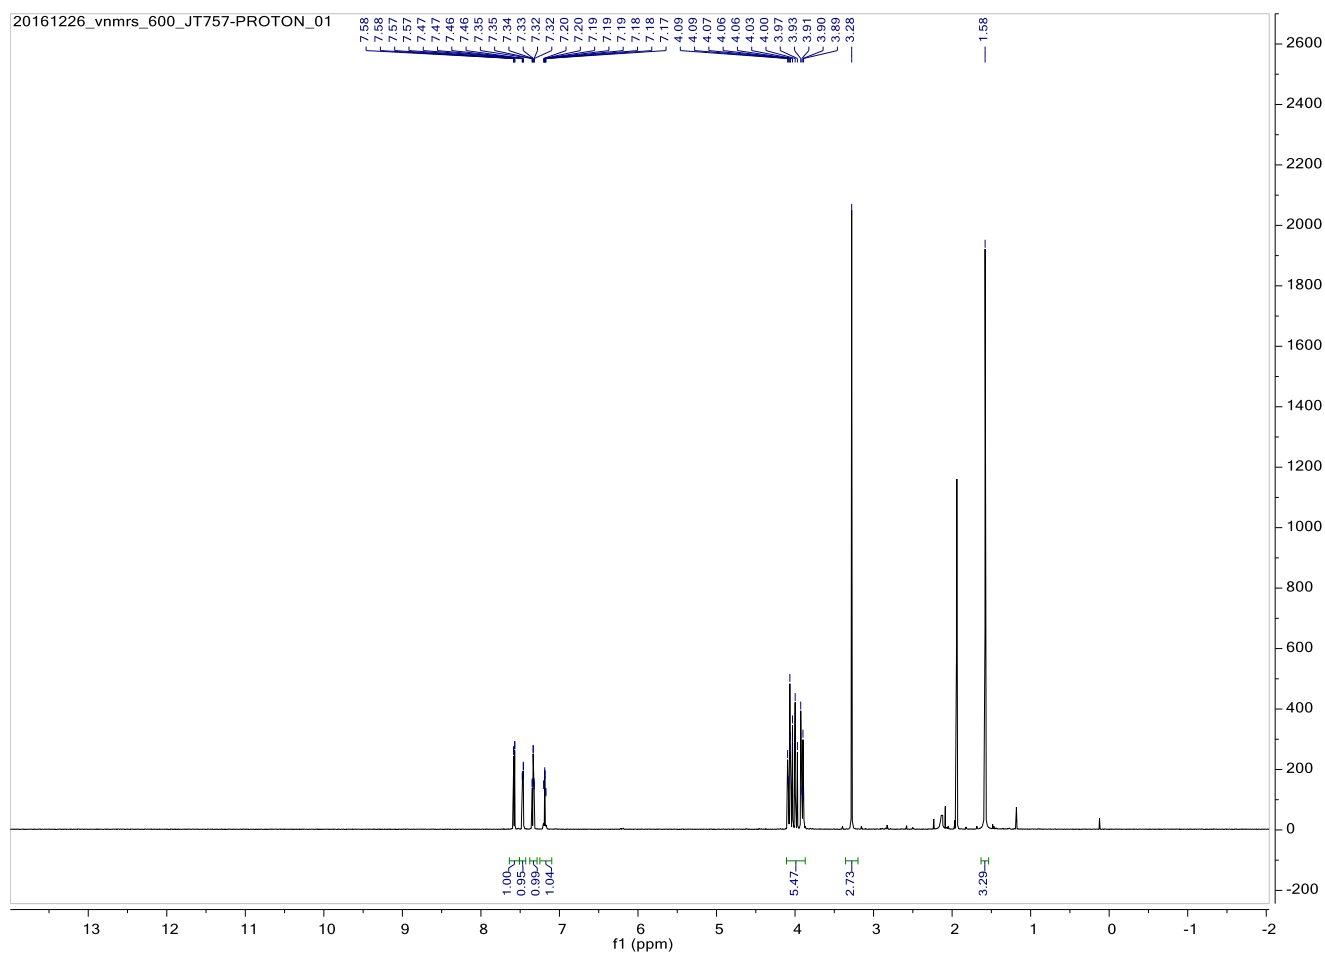

693

694

695

Supplementary Figure 82:  $^1\text{H}$  NMR of **7a** in acetonitrile- $d_3$  at 25 °C.

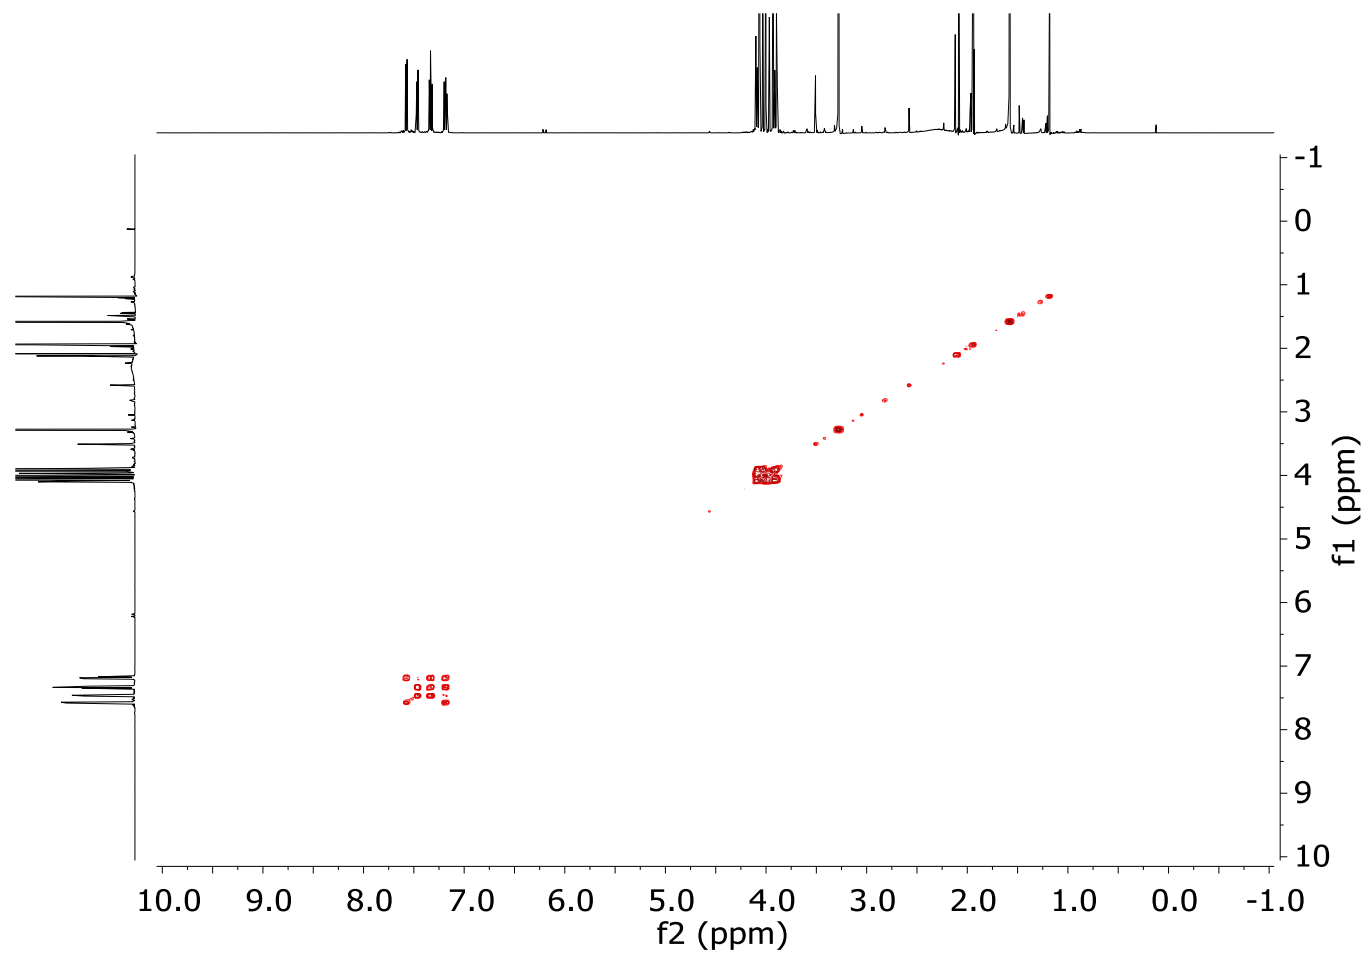

696

697

**Supplementary Figure 83:**  $^1\text{H}$ - $^1\text{H}$  COSY of **7a** in acetonitrile- $d_3$  at 25 °C.

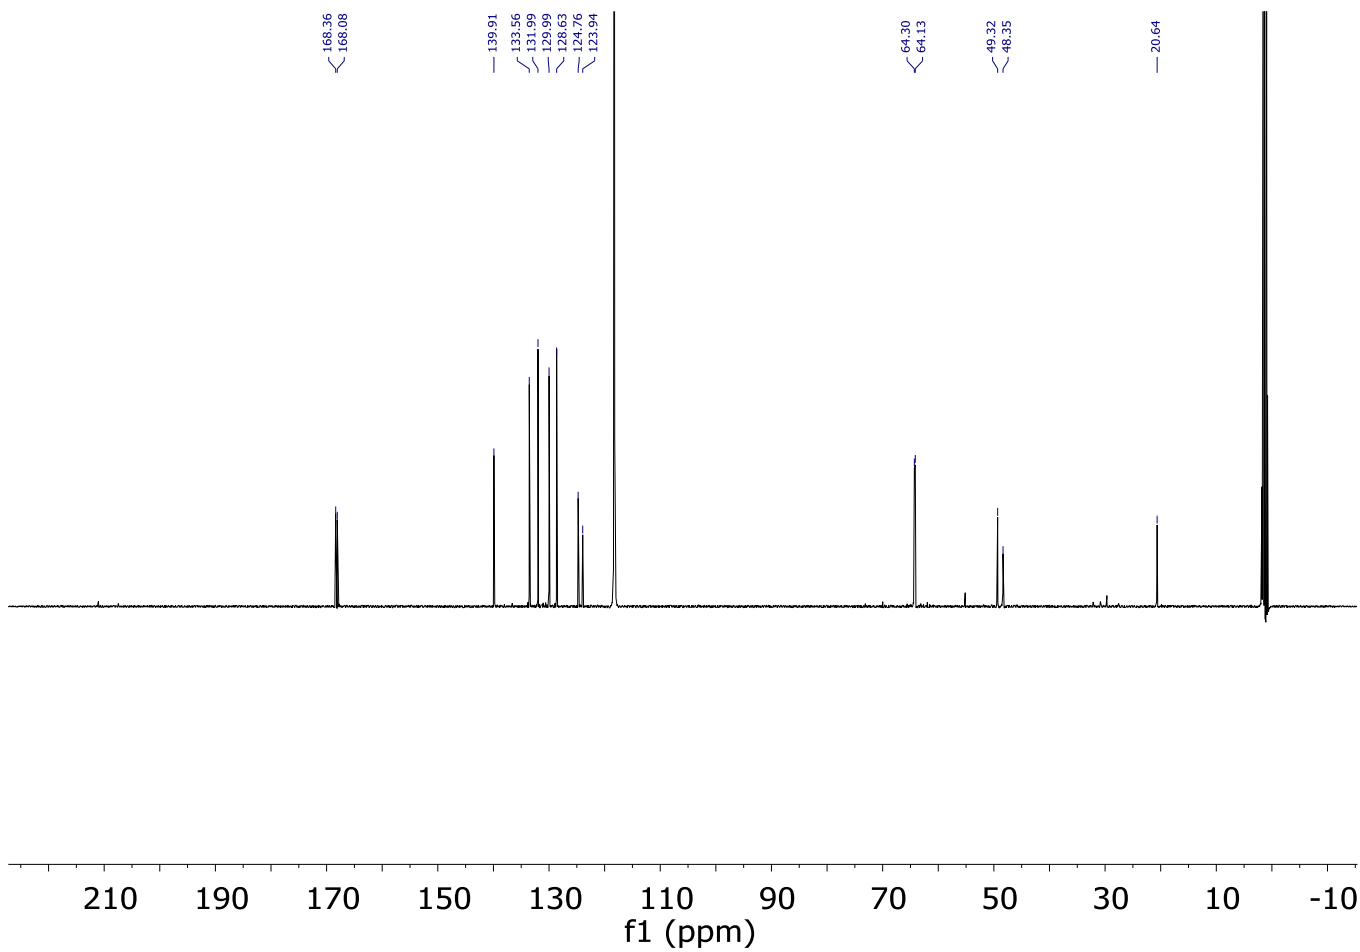

698  
699 **Supplementary Figure 84:**  $^{13}\text{C}$  NMR of **7a** in acetonitrile- $d_3$  at 25 °C.

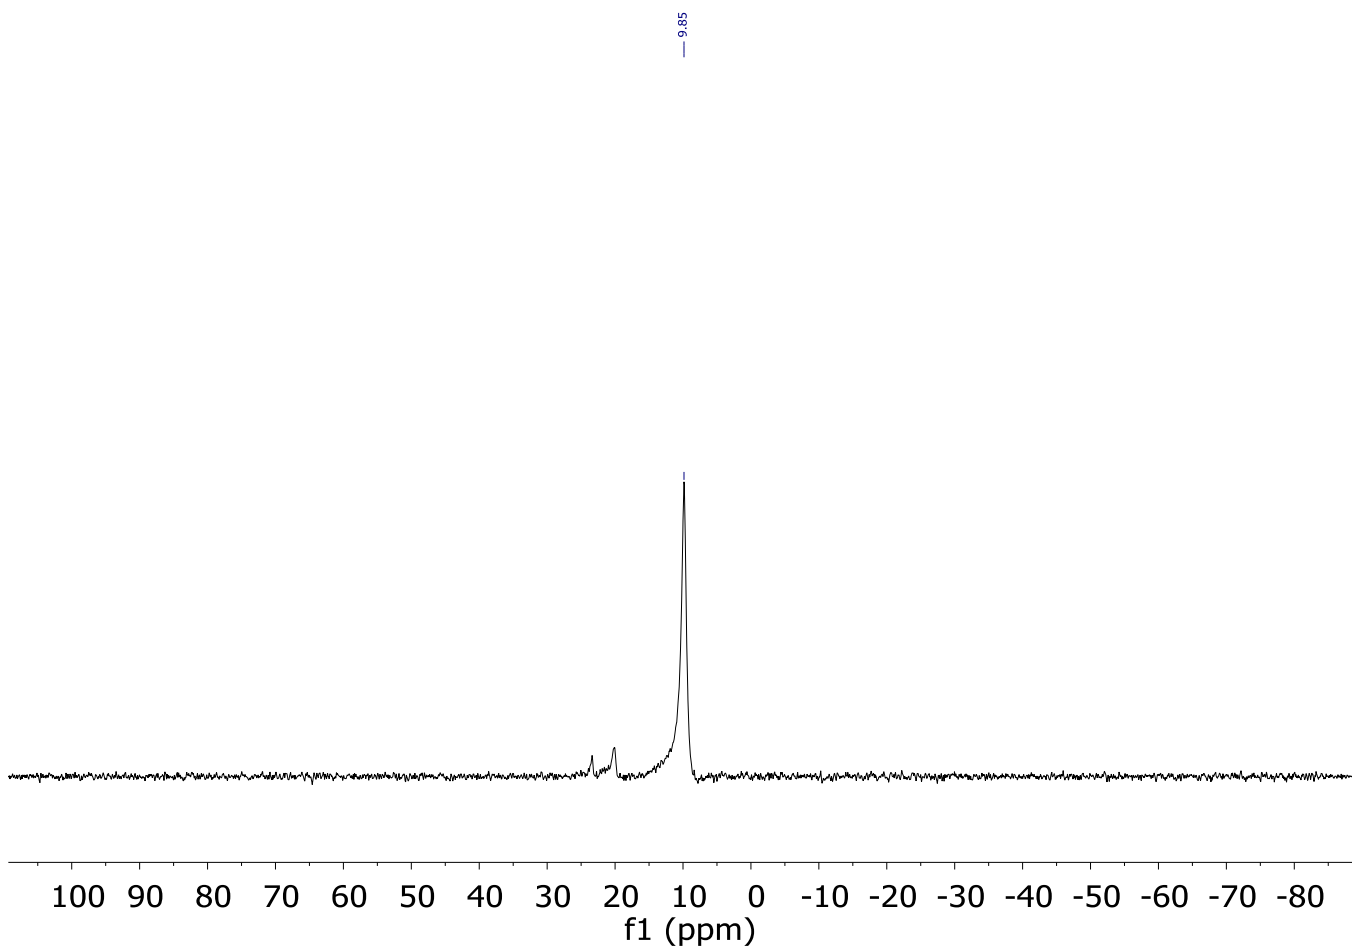

Supplementary Figure 85:  $^{11}\text{B}$  NMR of **7a** in acetonitrile- $d_3$  at 25 °C.

700

701

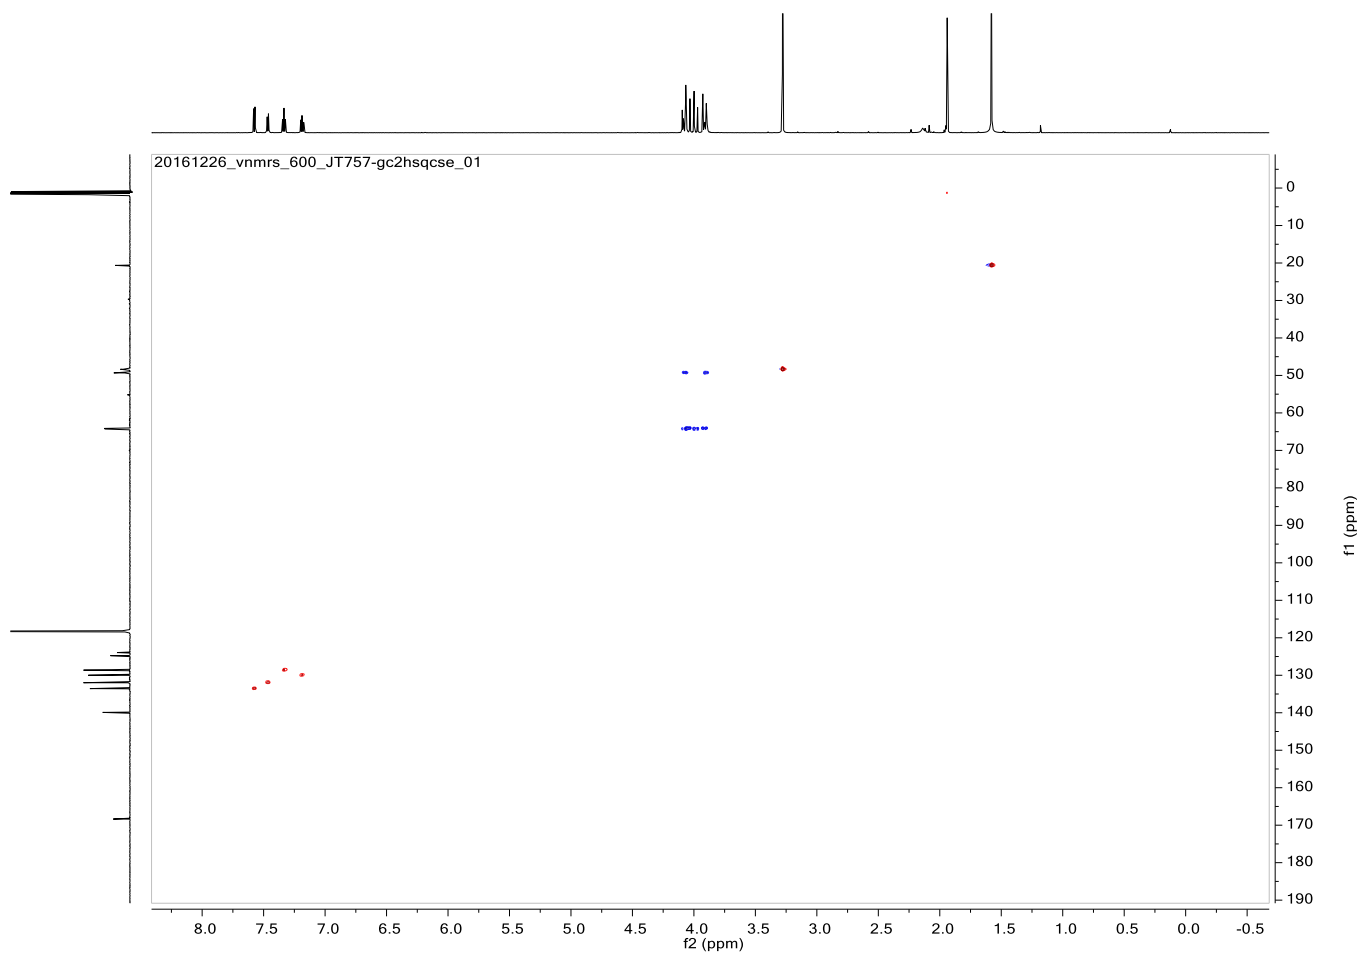

702

703

**Supplementary Figure 86:**  $^1\text{H}$ - $^{13}\text{C}$  HSQC NMR of **7a** in acetonitrile- $d_3$  at 25 °C.

704 Compound **11a**

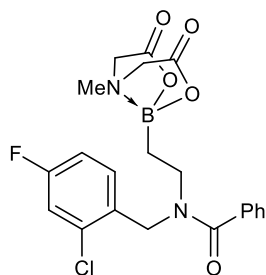

705

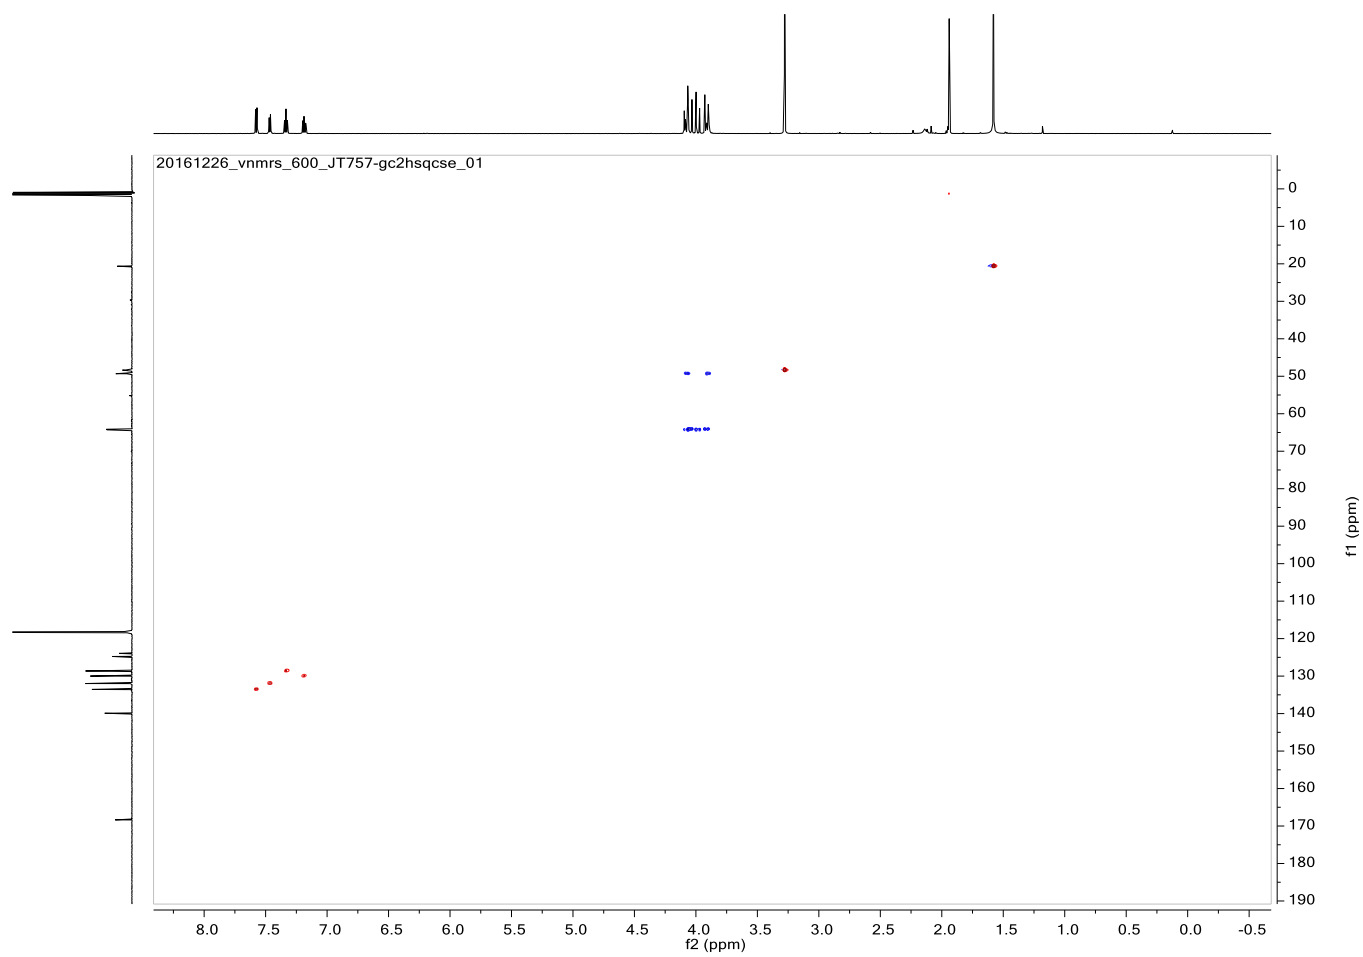

706

707

**Supplementary Figure 87:** <sup>1</sup>H NMR of **11a** in acetonitrile-*d*<sub>3</sub> at 60 °C.

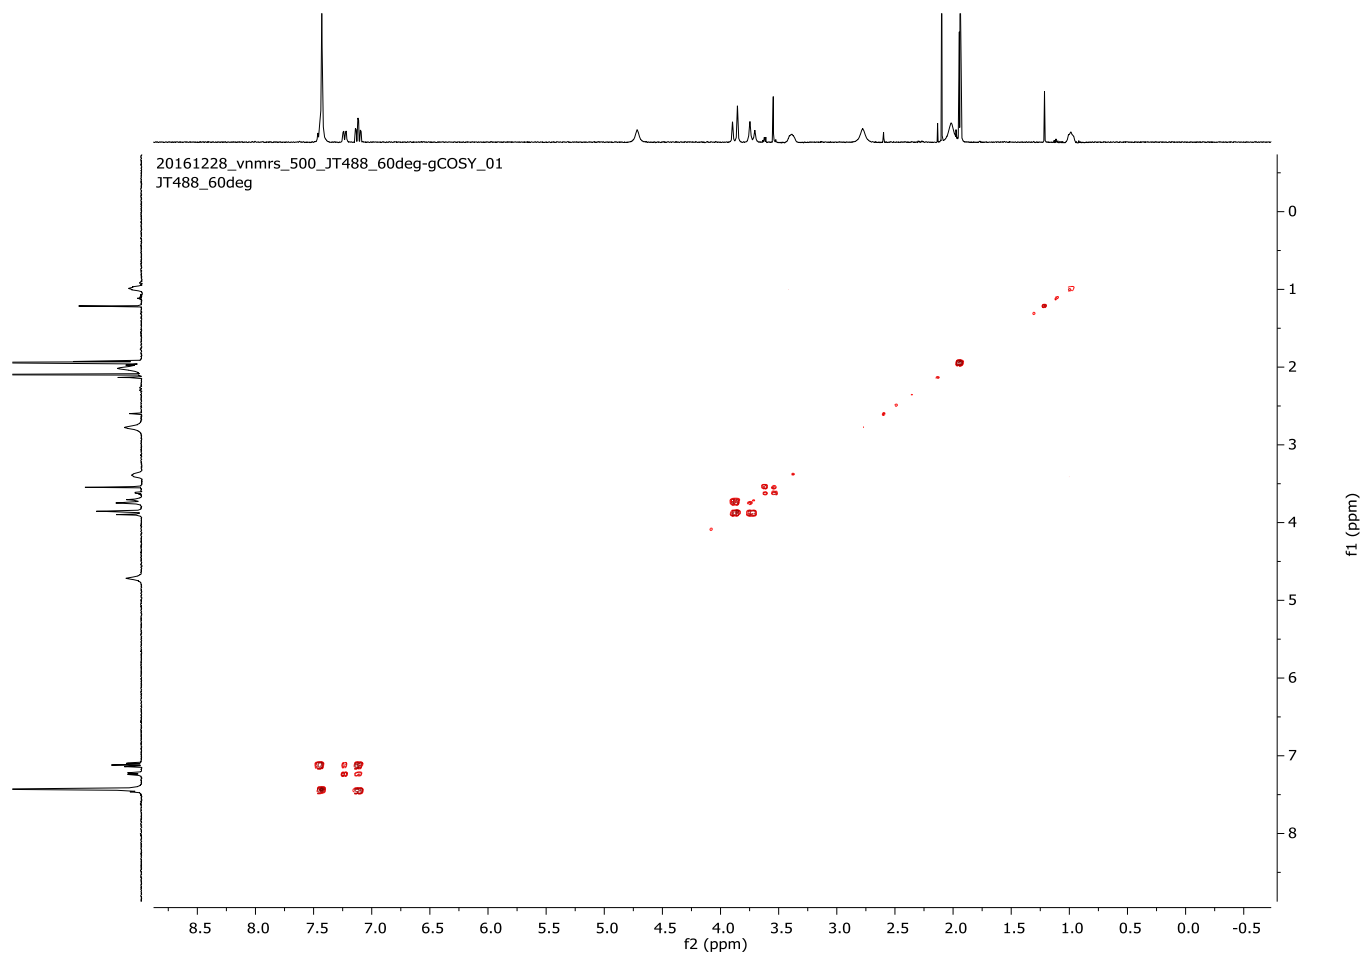

708

709

**Supplementary Figure 88:**  $^1\text{H}$ - $^1\text{H}$  COSY of **11a** in acetonitrile- $d_3$  at 60 °C.



60 deg

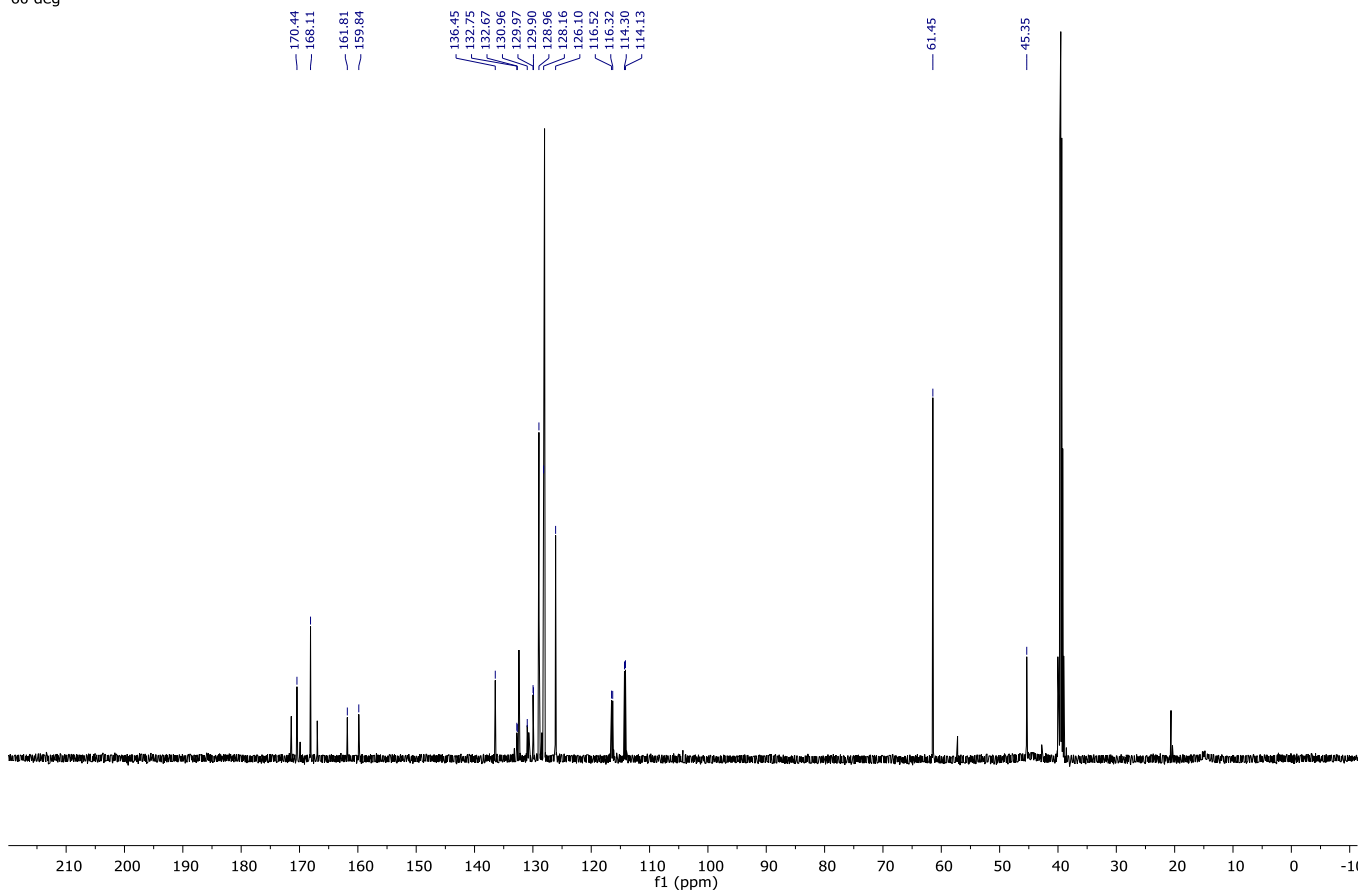

710

711

712

**Supplementary Figure 89:**  $^{13}\text{C}$  NMR of **11a** in dimethylsulfoxide- $d_3$  at 60 °C.

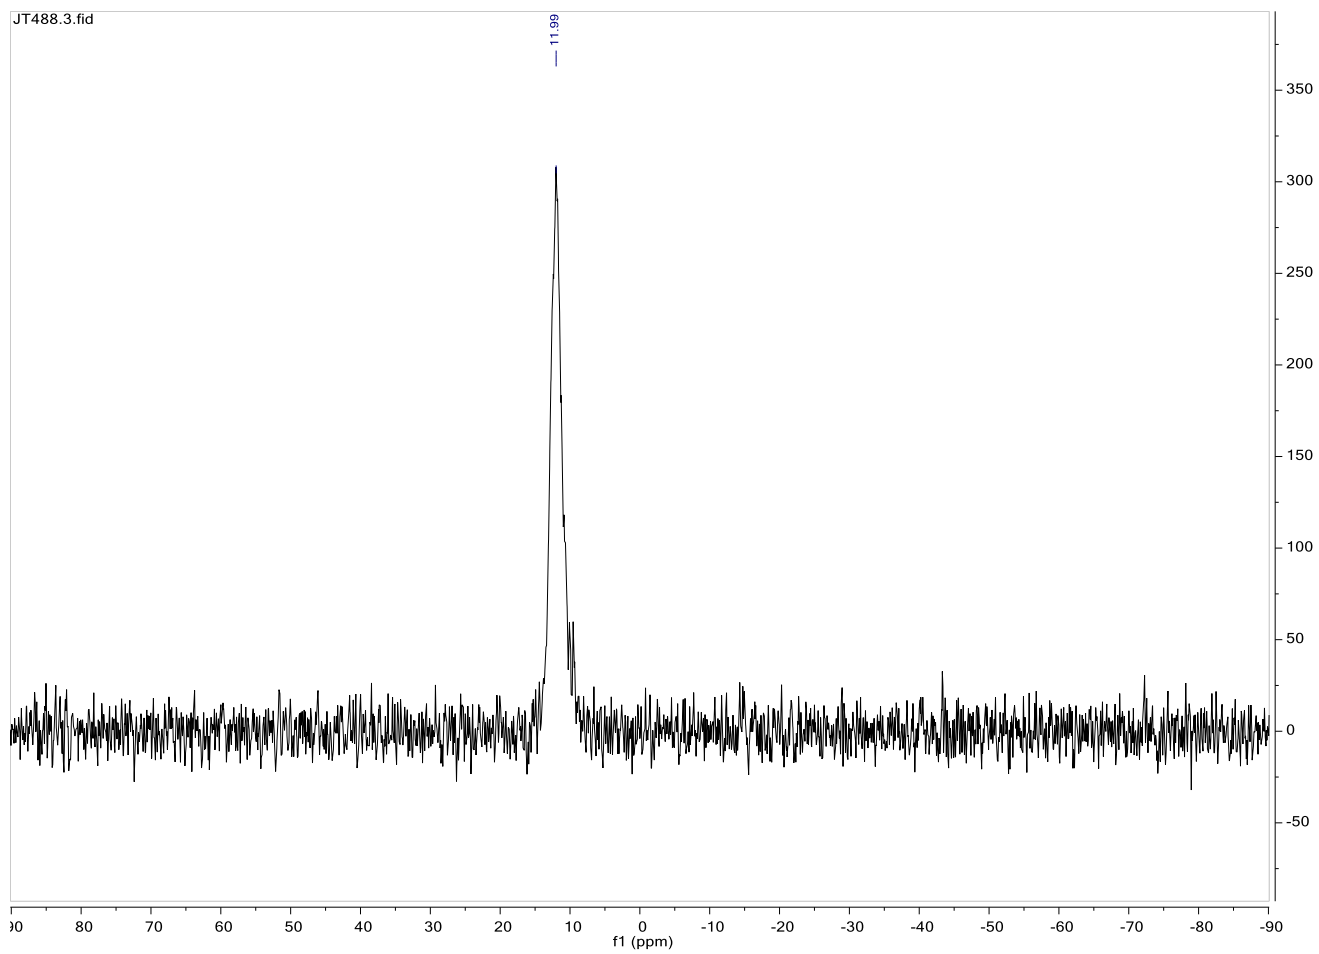

713

714

**Supplementary Figure 90:**  $^{11}\text{B}$  NMR of **11a** in acetonitrile- $d_3$  at 25 °C.

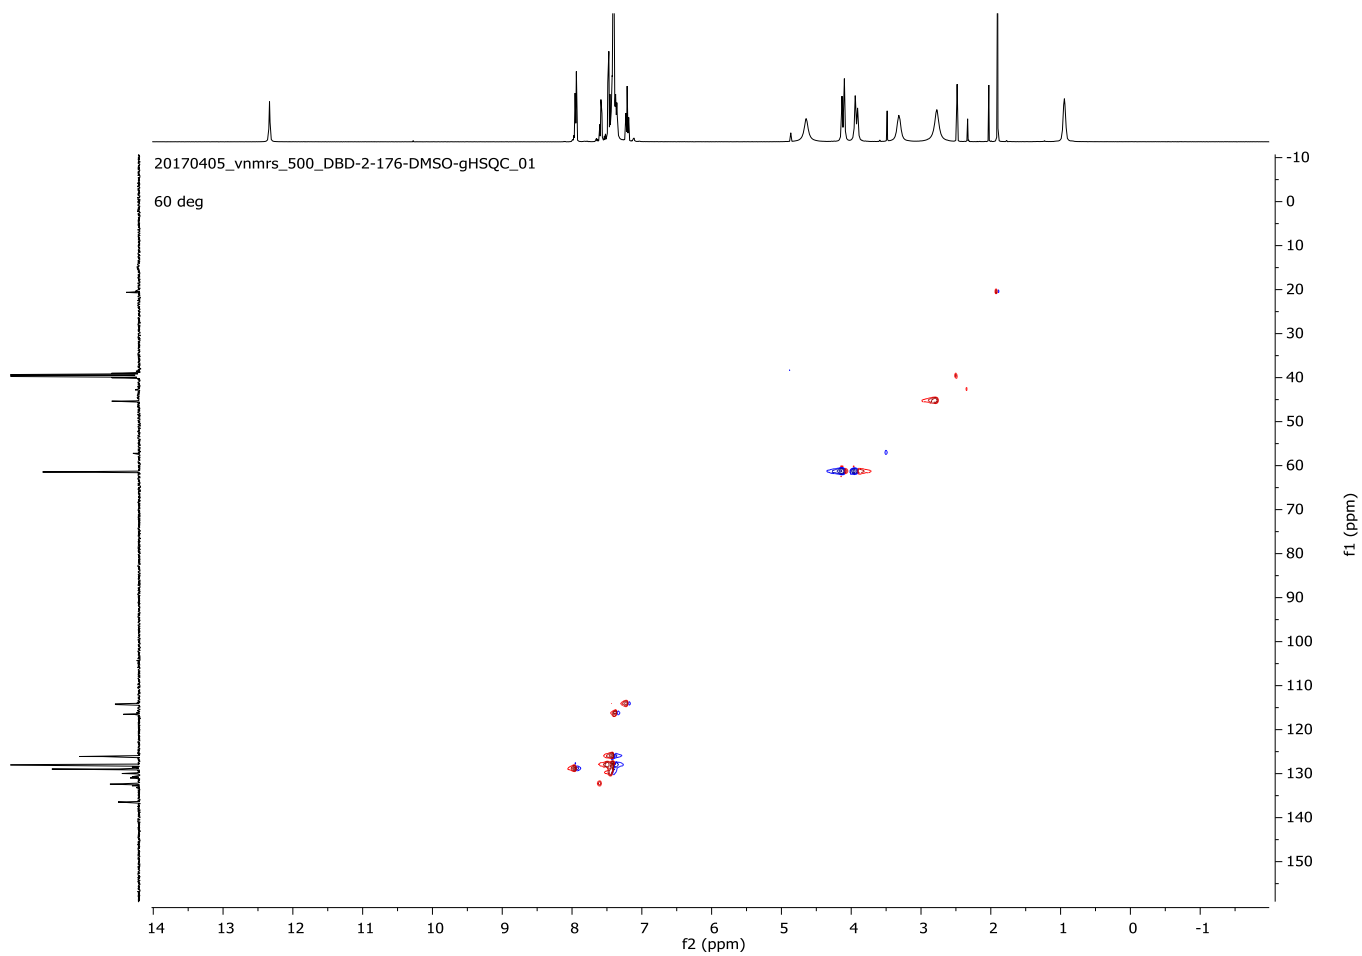

715

716

**Supplementary Figure 91:**  $^1\text{H}$ - $^{13}\text{C}$  HSQC NMR of **11a** in dimethylsulfoxide- $d_3$  at 60 °C.

717

--114.90  
--115.35

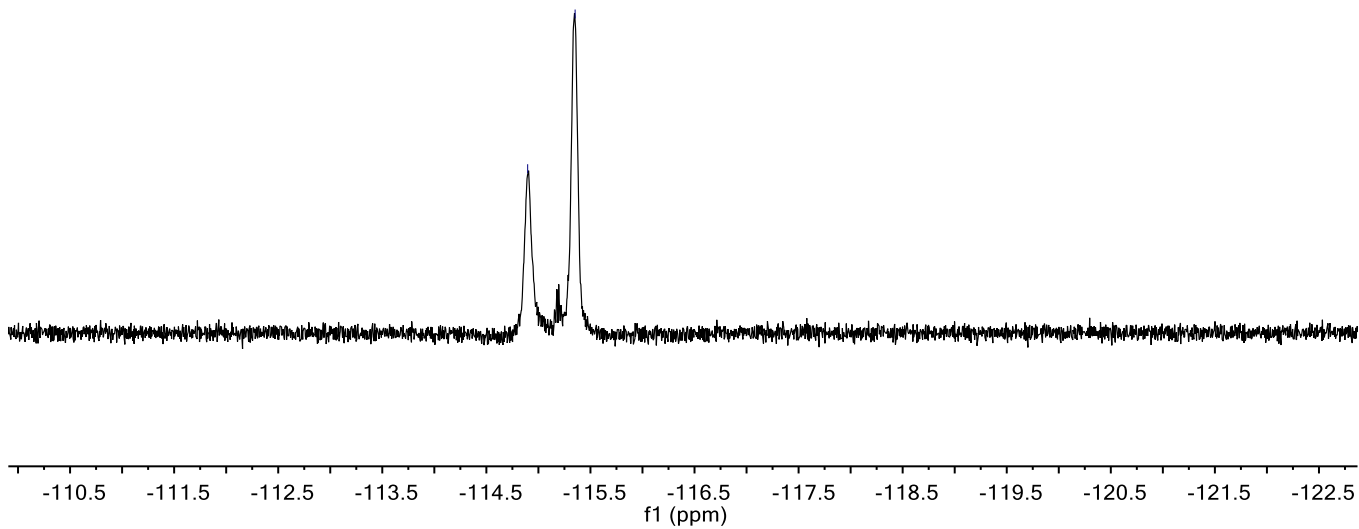

**Supplementary Figure 92:**  $^{19}\text{F}$  NMR of **11a** in acetonitrile- $d_3$  at 25 °C.

720 Compound **11b**

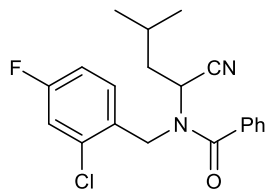

721

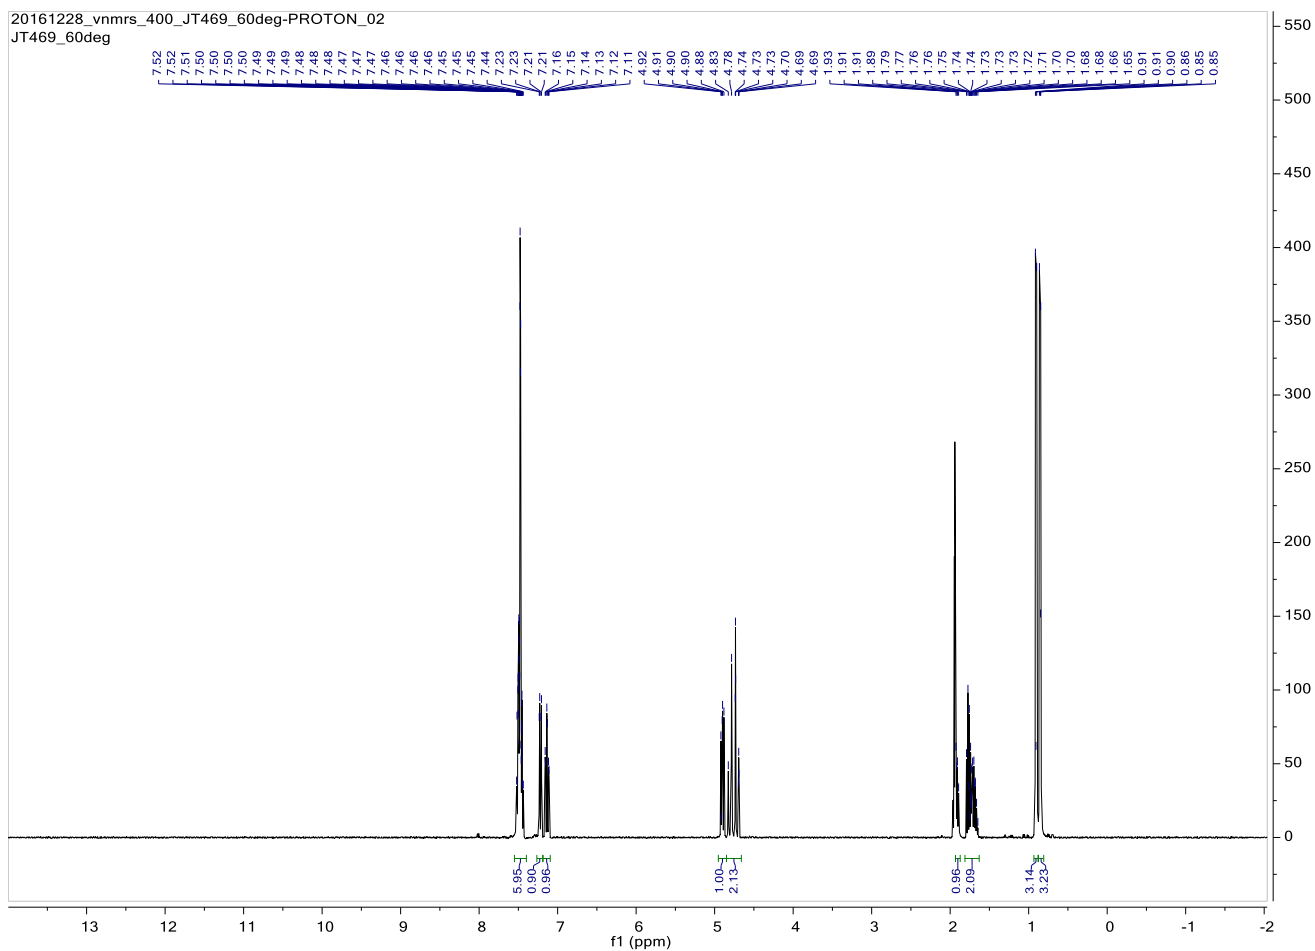

722

723

Supplementary Figure 93:  $^1\text{H}$  NMR of **11b** in acetonitrile- $d_3$  at 60 °C.

724

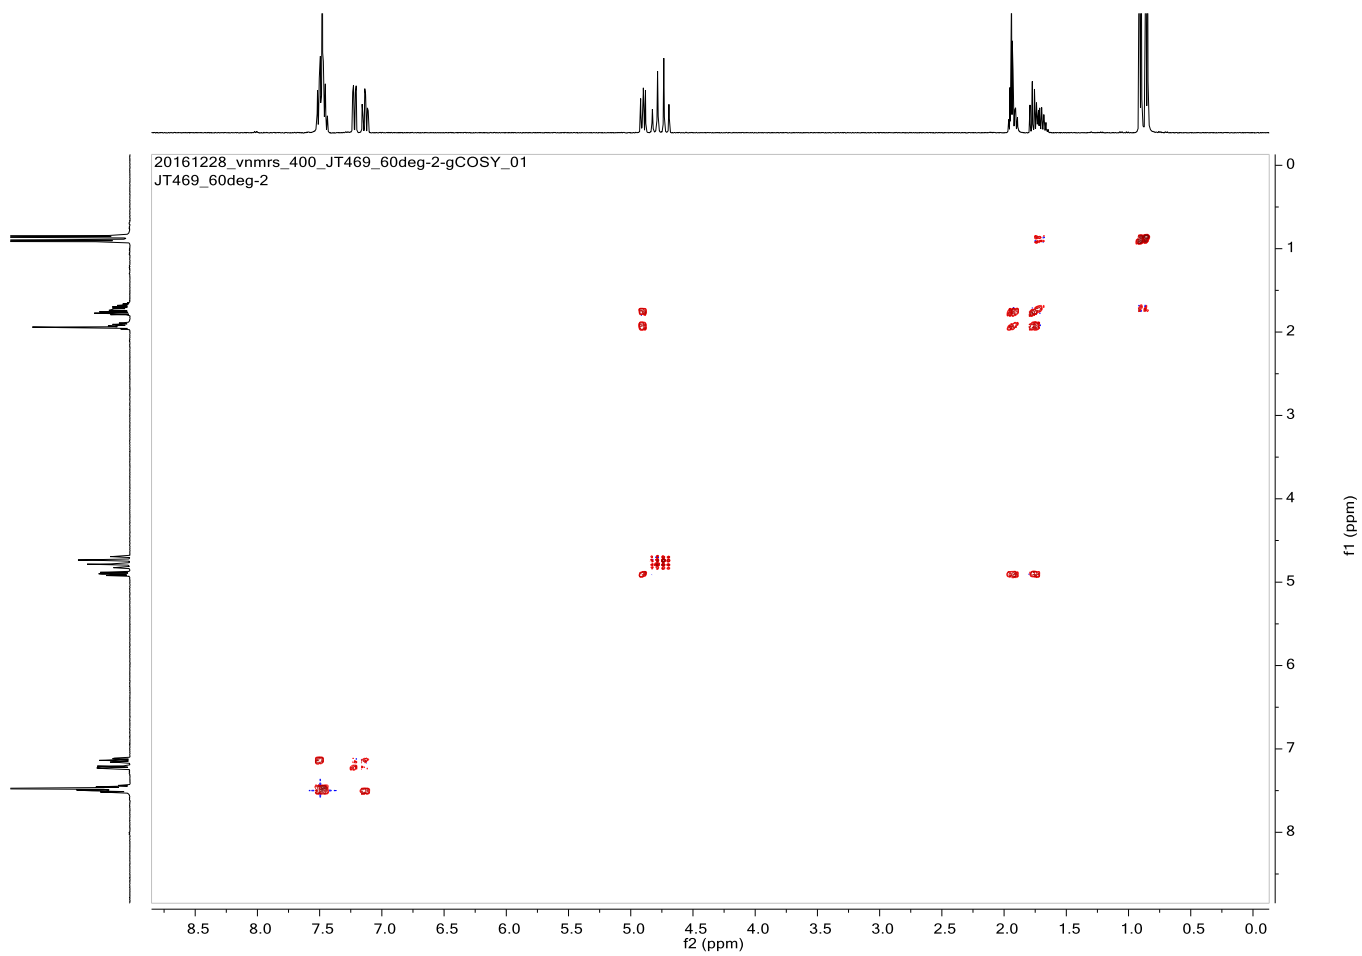

725

726

727

**Supplementary Figure 94:**  $^1\text{H}$ - $^1\text{H}$  COSY of **11b** in acetonitrile- $d_3$  at 60 °C.

20170105\_vnmrs\_500\_JT469\_60deg-CARBON\_01  
JT469\_60deg

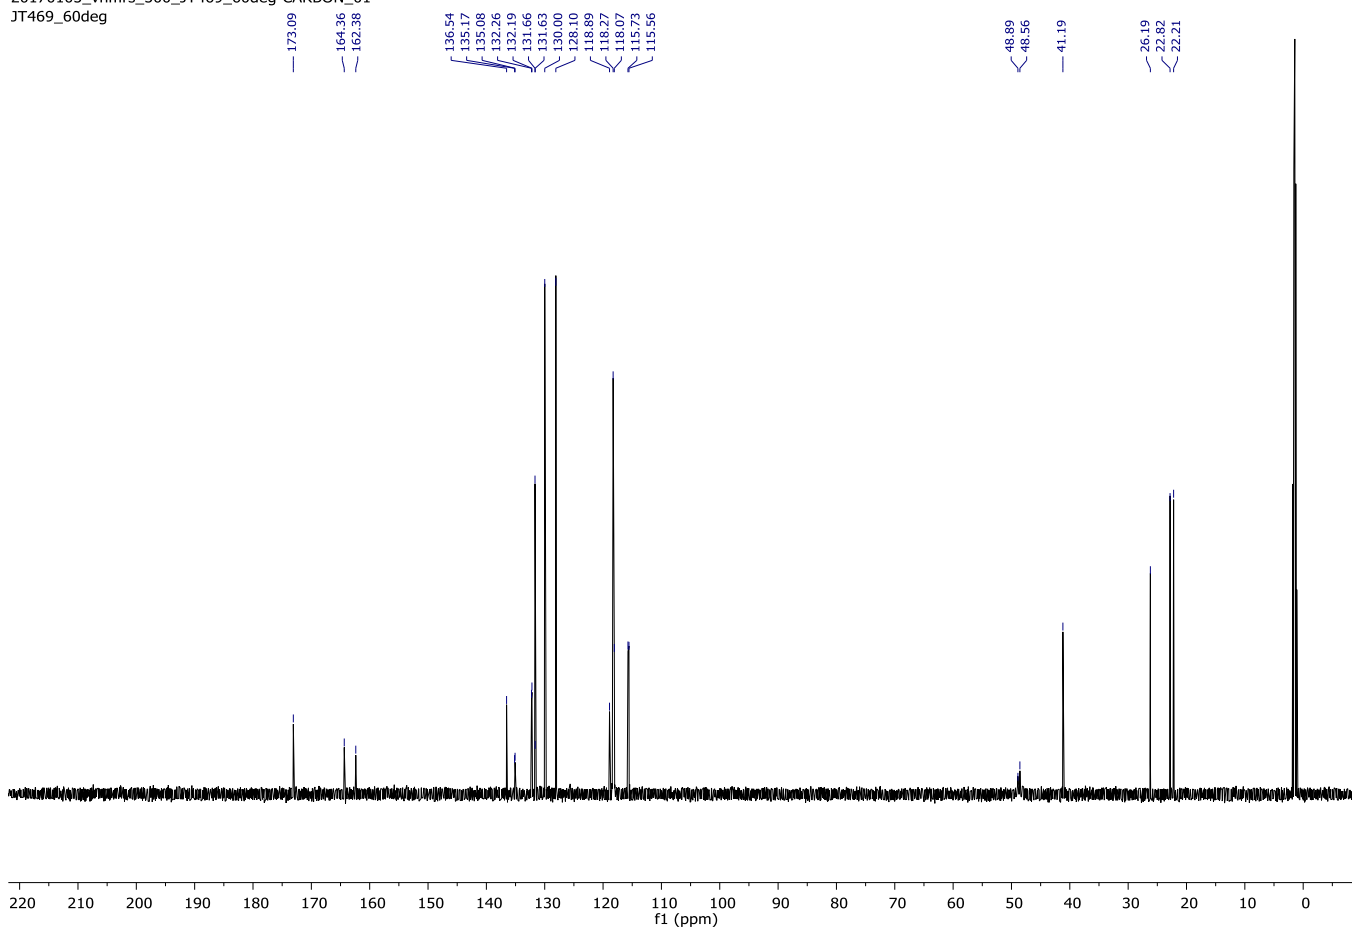

728

729

Supplementary Figure 95:  $^{13}\text{C}$  NMR of **11b** in acetonitrile- $d_6$  at 60 °C.

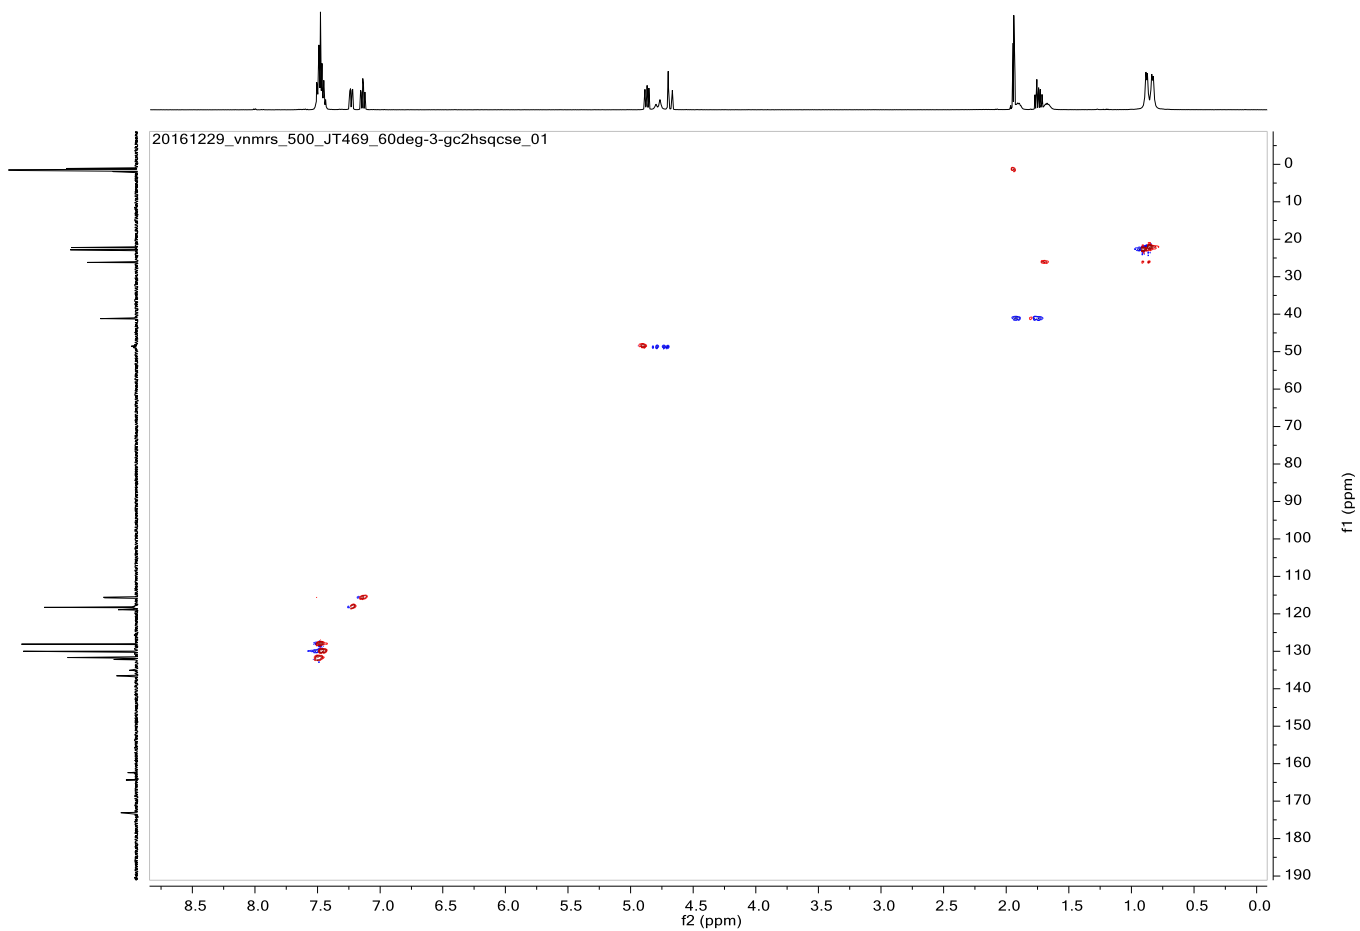

730

731

**Supplementary Figure 96:**  $^1\text{H}$ - $^{13}\text{C}$  HSQC NMR of **11b** in acetonitrile- $d_3$  at 60 °C.



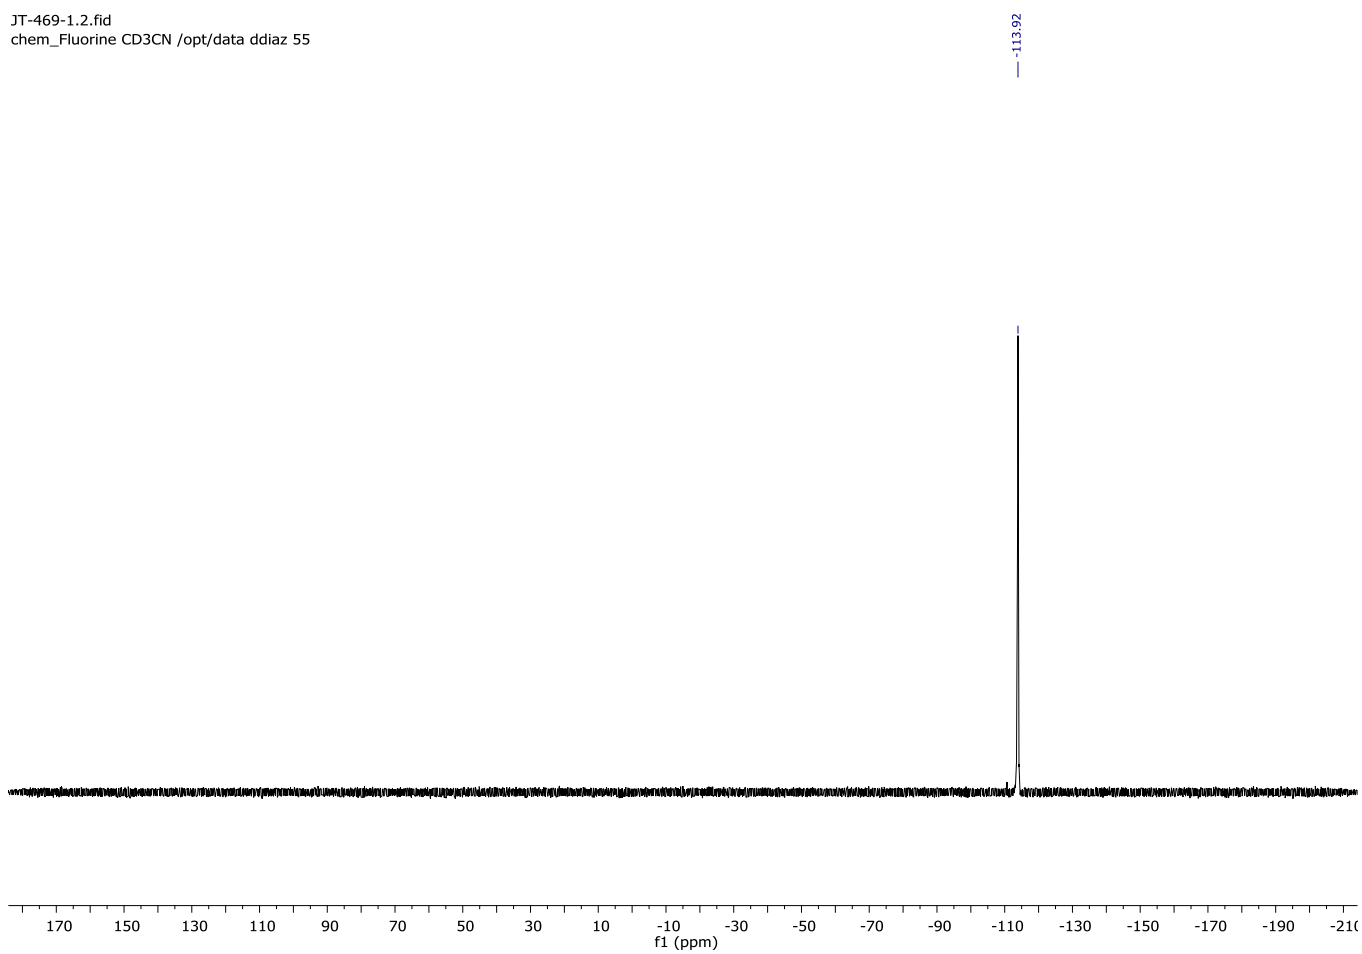

732

733

**Supplementary Figure 97:**  $^{19}\text{F}$  NMR of **11b** in acetonitrile- $d_3$  at 25 °C.

734 Compound **11c**

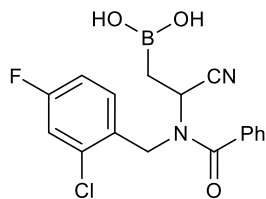

735

20170106\_vnmrs\_500\_JT748-2\_55deg-MeOH-PROTON\_01  
JT748-2\_55deg-MeOH

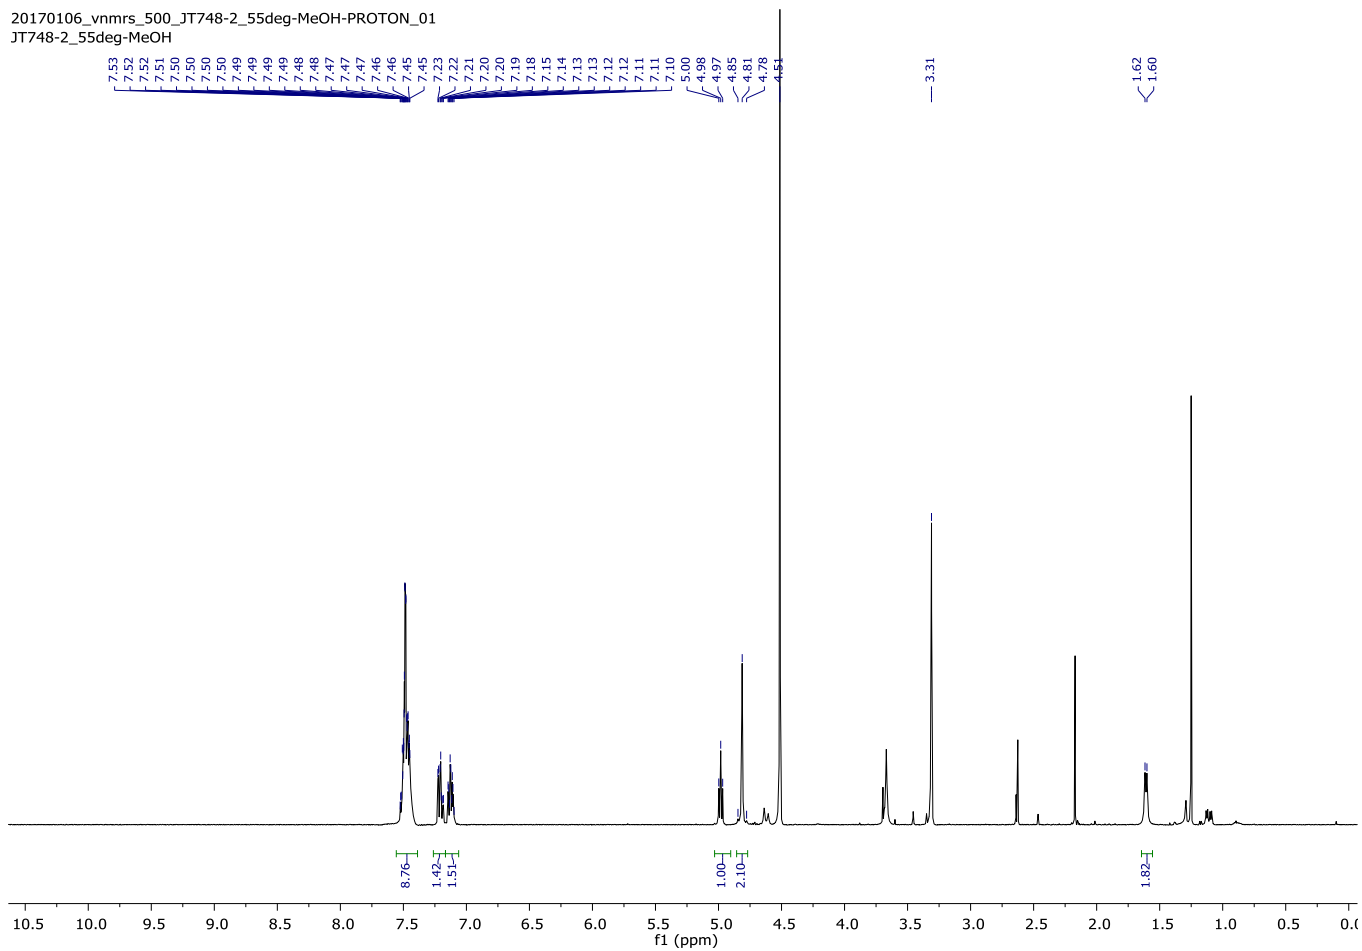

736

737

738

Supplementary Figure 98: <sup>1</sup>H NMR of **11c** in methanol-*d*<sub>4</sub> at 55 °C.

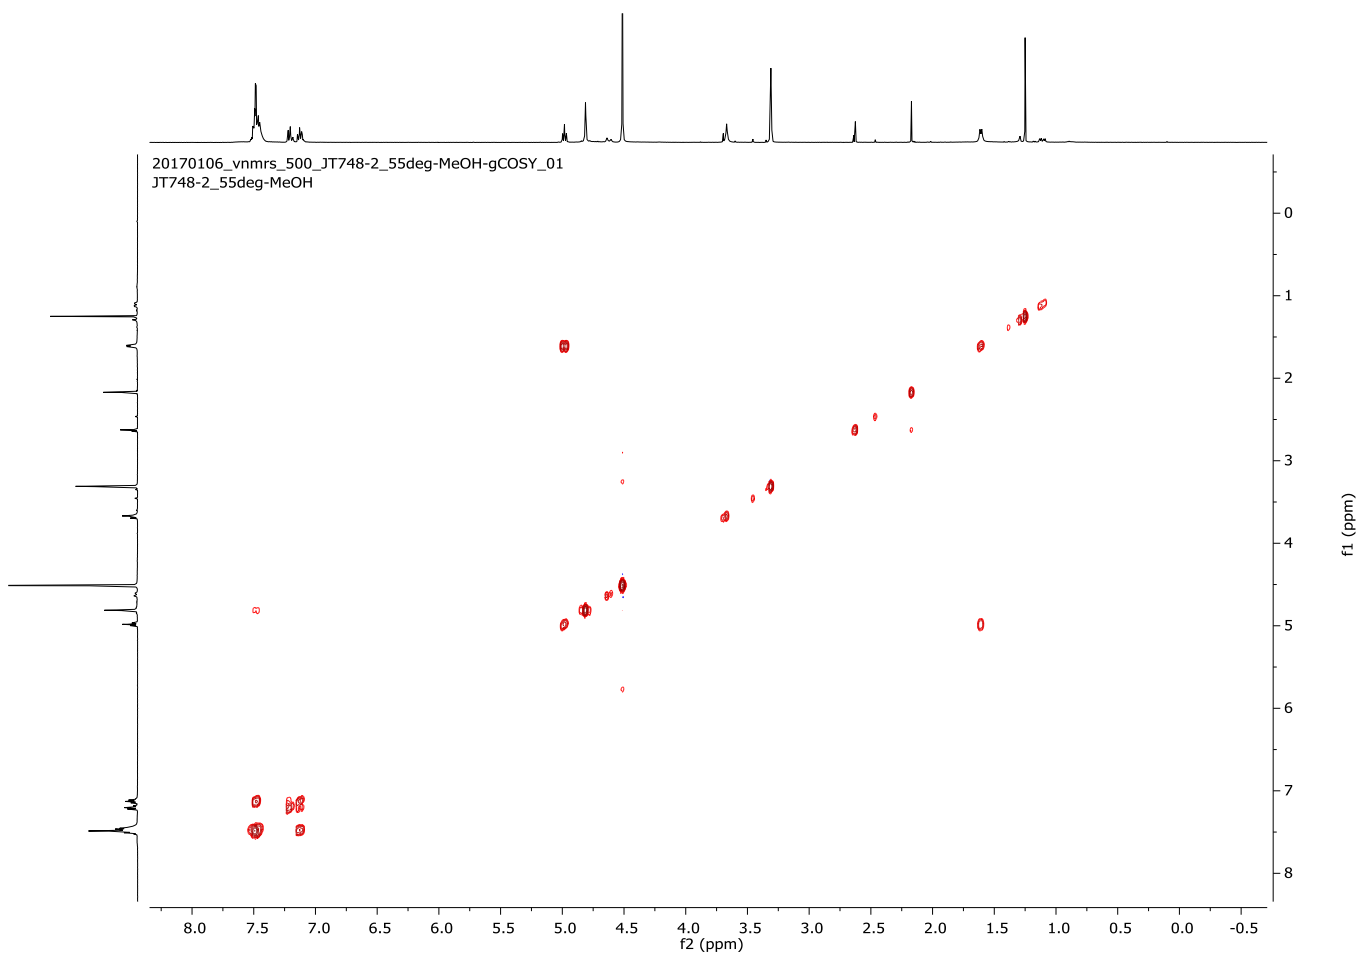

739

740

741

**Supplementary Figure 99:**  $^1\text{H}$ - $^1\text{H}$  COSY of **11c** in methanol- $d_4$  at 55 °C.

20170107\_vnmrs\_500\_JT748-2\_55deg-MeOH-CARBON\_01  
JT748-2\_55deg-MeOH

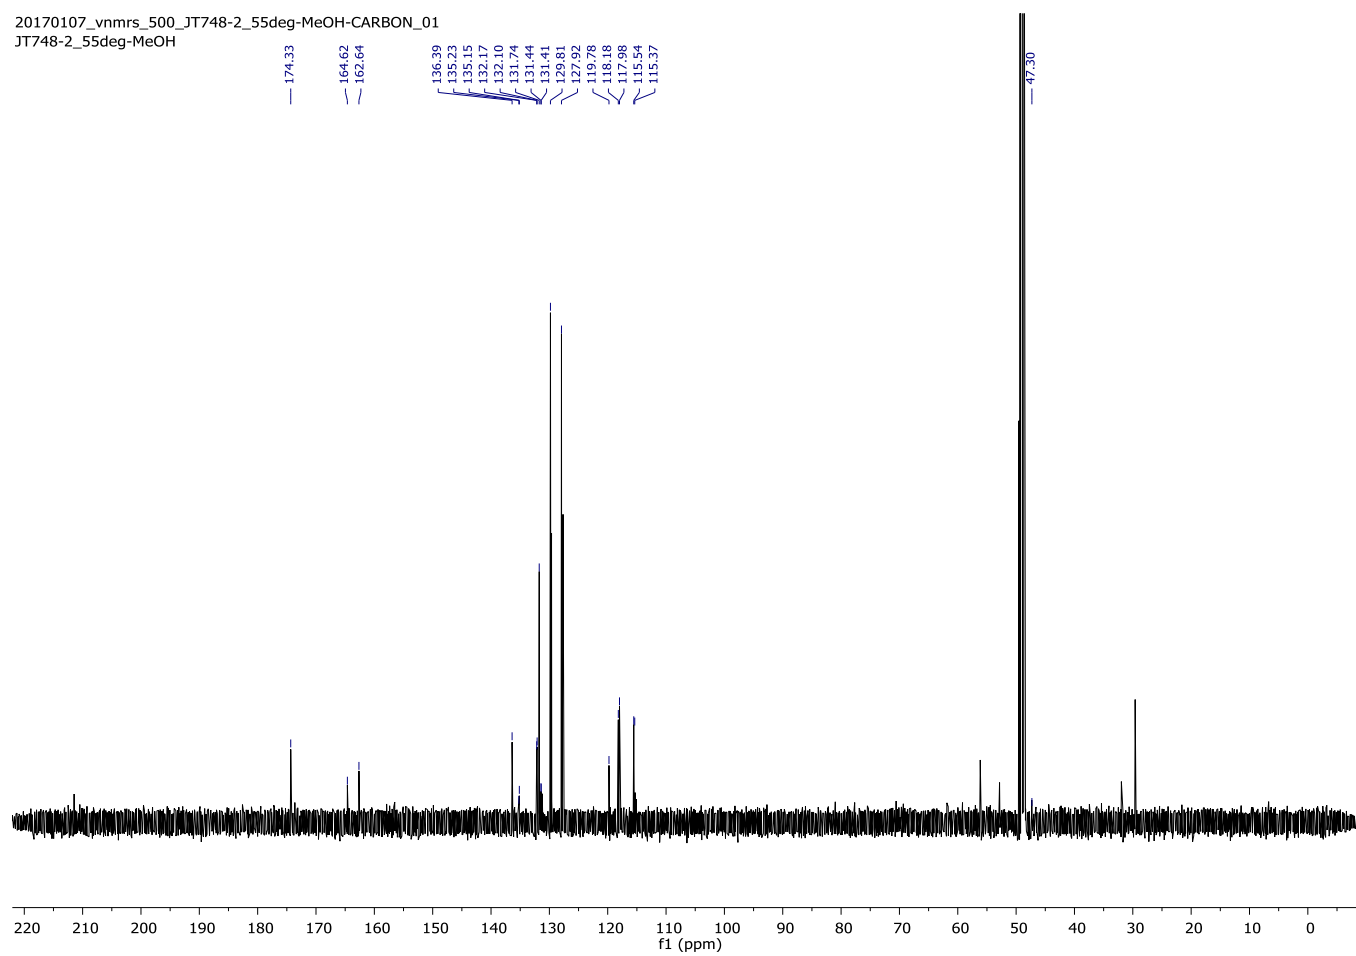

742

743

744

**Supplementary Figure 100:**  $^{13}\text{C}$  NMR of **11c** in methanol- $d_4$  at 55 °C.

745

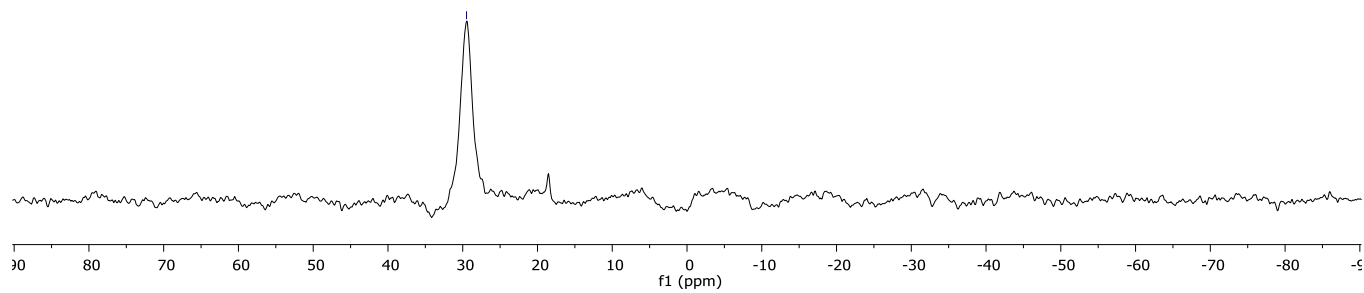

746

**Supplementary Figure 101:**  $^{11}\text{B}$  NMR of **11c** in methanol- $d_4$  at 50 °C.

747

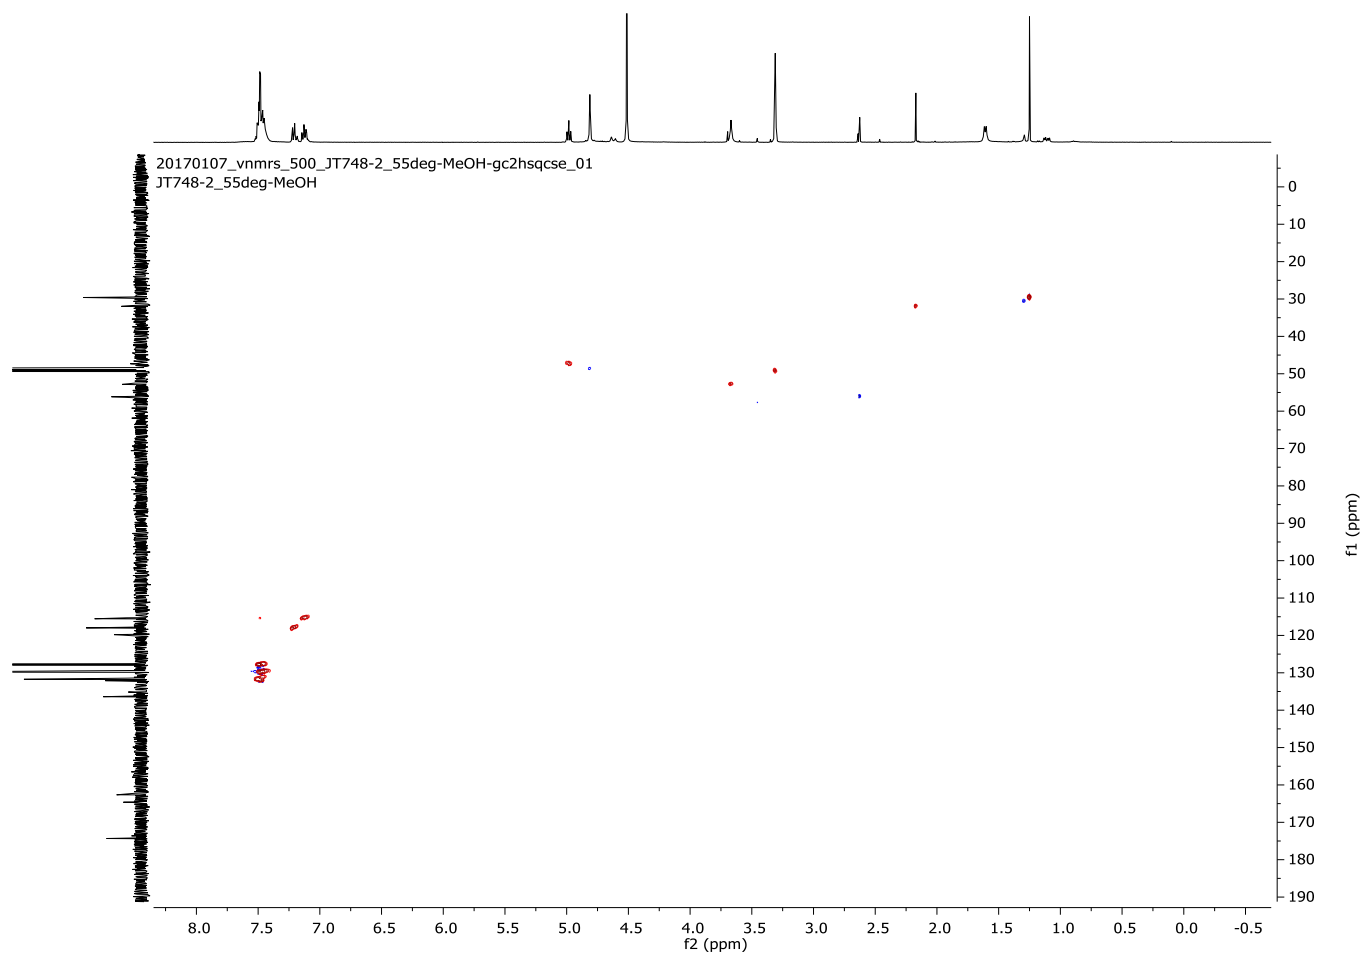

748

749

**Supplementary Figure 102:**  $^1\text{H}$ - $^{13}\text{C}$  HSQC NMR of **11c** in methanol- $d_4$  at 55 °C.

750

-113.87  
-114.13  
-115.55  
-115.84  
-117.03

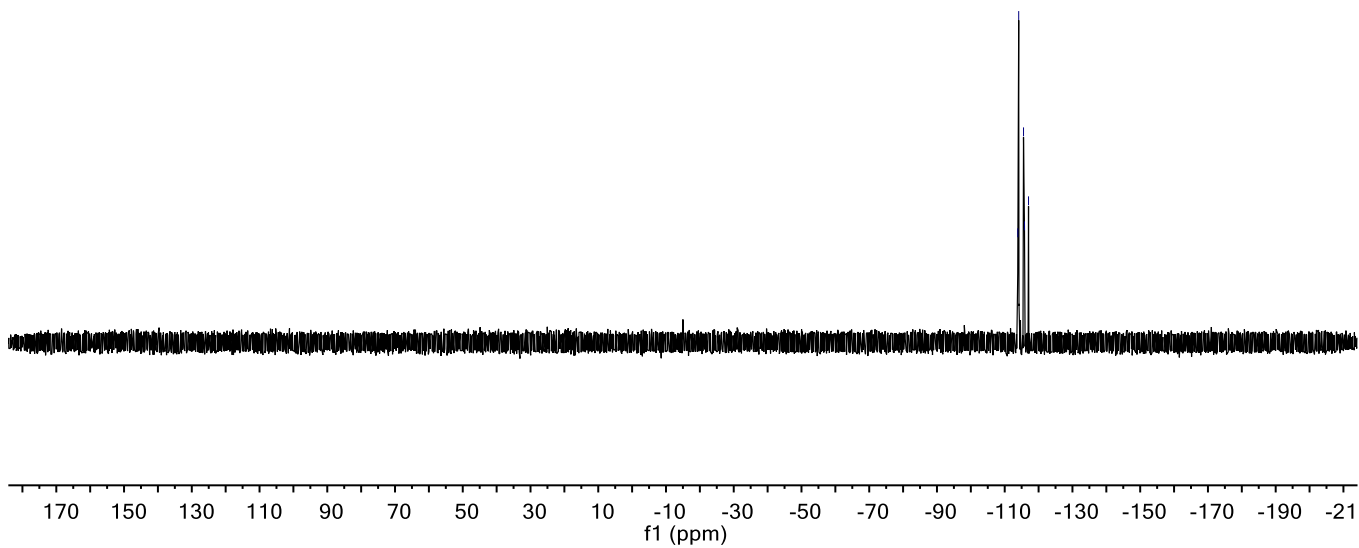

Supplementary Figure 103:  $^{19}\text{F}$  NMR of **11c** in methanol- $d_4$  at 25 °C.

751

752

753

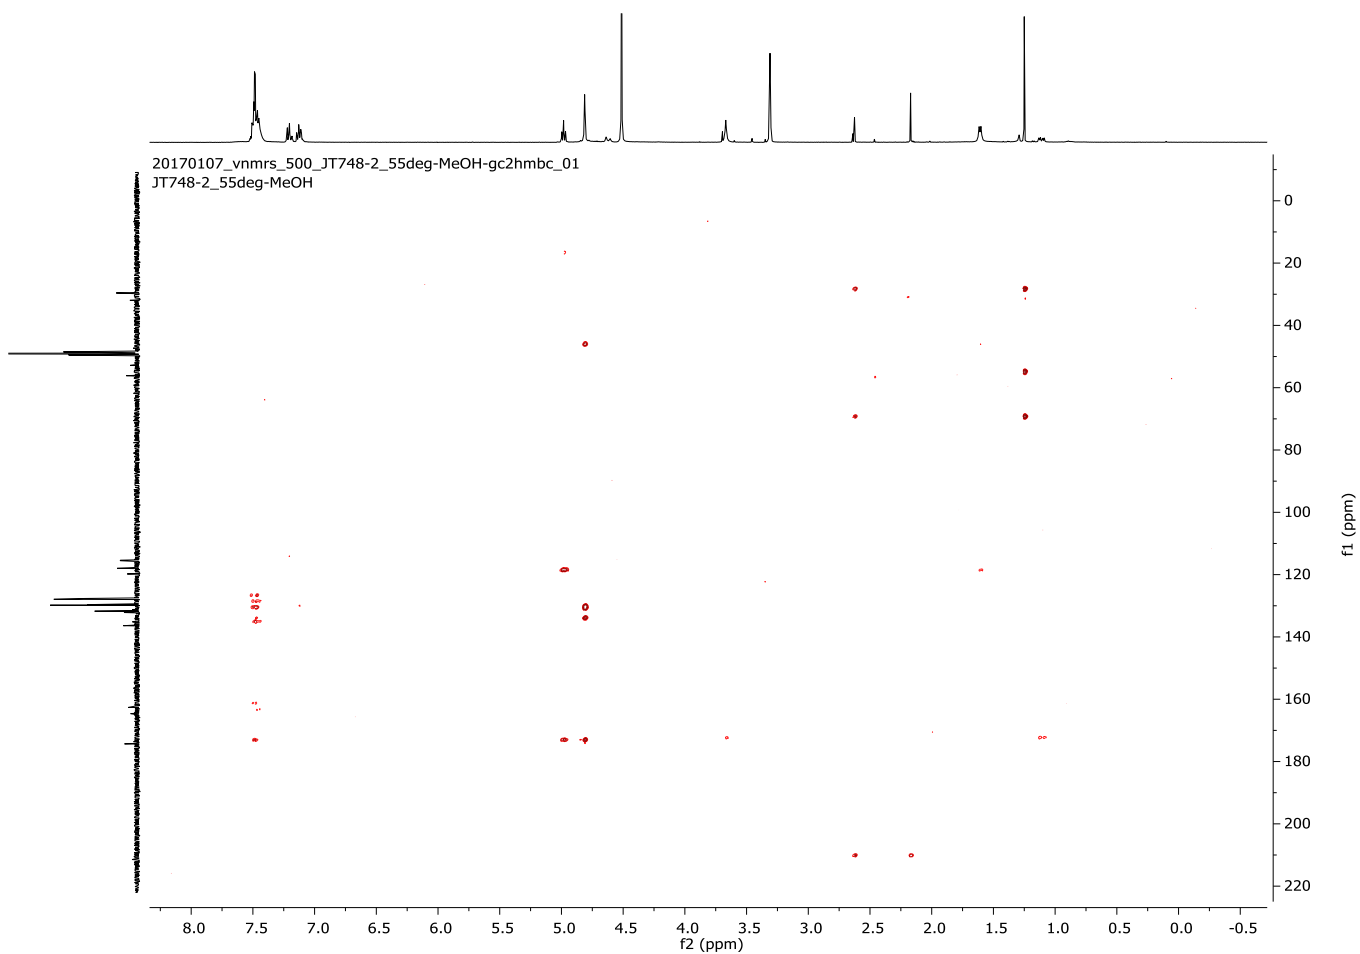

754

755

756

757

**Supplementary Figure 104:**  $^1\text{H}$ - $^{13}\text{C}$  HMBC NMR of **11c** in methanol- $d_4$  at 55 °C.



## Supplementary References

- 758  
759
- 760 1. St. Denis, J. D. *et al.* Boron-containing enamine and enamide linchpins in the synthesis of  
761 nitrogen heterocycles. *J. Am. Chem. Soc.* **136**, 17669–17673 (2014).
- 762 2. He, Z. & Yudin, A. K. Amphoteric  $\alpha$ -boryl aldehydes. *J. Am. Chem. Soc.* **133**, 13770–13773  
763 (2011).
- 764 3. He, Z., Trinchera, P., Adachi, S., St. Denis, J. D. & Yudin, A. K. Oxidative geminal  
765 functionalization of organoboron compounds. *Angew. Chem. Int. Ed.* **51**, 11092–11096 (2012).
- 766 4. Diaz, D. B. *et al.* Synthesis of aminoboronic acid derivatives from amines and amphoteric boryl  
767 carbonyl compounds. *Angew. Chemie Int. Ed.* **55**, 12659–12663 (2016).
- 768 5. Adachi, S. *et al.* Facile synthesis of borofragments and their evaluation in activity-based protein  
769 profiling. *Chem. Commun.* **51**, 3608–3611 (2015).
- 770 6. Weerapana, E. *et al.* Quantitative reactivity profiling predicts functional cysteines in proteomes.  
771 *Nature* **468**, 790–795 (2010).
- 772
